# Supplementary material for: Hepatocyte-specific METTL3 ablation by Alb-iCre mice (GPT), but not by Alb-Cre mice (JAX), resulted in acute liver failure (ALF) and postnatal lethality
Source: publisher site journal article supplement (doi:10.18632/aging.205753), 2024-04-22
Supplement: Supplementary file [file aging-v16i8-205753-supplementary-material-SD1.pdf]

**SUPPLEMENTARY FIGURES**

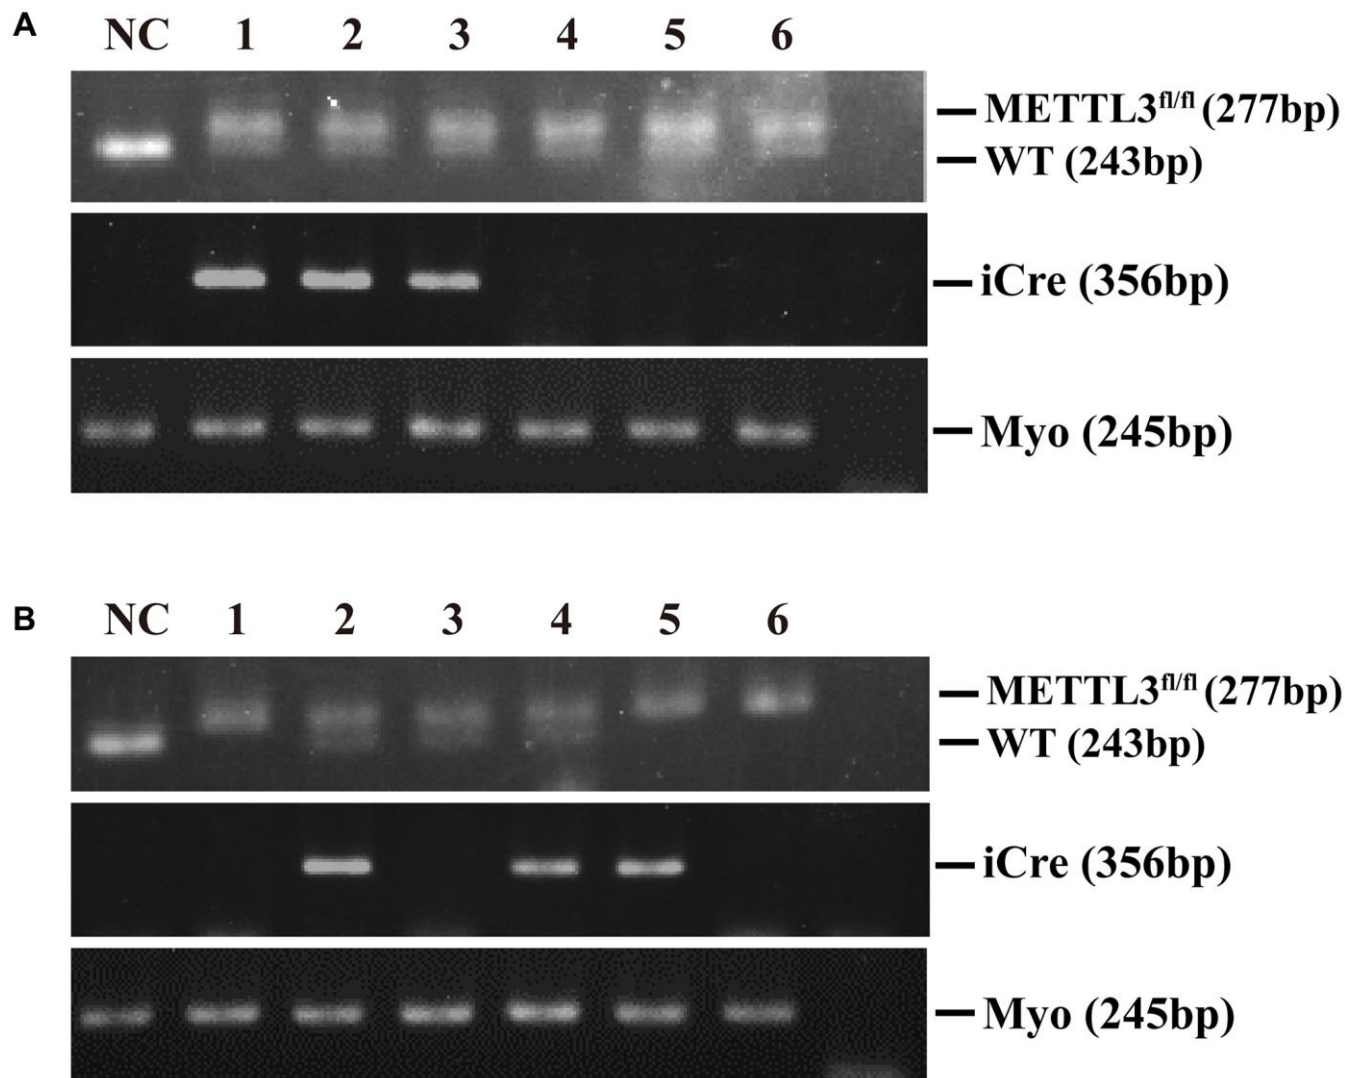

**Supplementary Figure 1. PCR-based genotyping of hepatocyte-specific METTL3 homozygous knockout (METTL3<sup>Δhep</sup>) mice by Alb-iCre mice (GPT).** (A) PCR-based genotyping displays the offspring with indicated genotypes from intercrossing METTL3<sup>fl/fl</sup> mice and Alb-iCre (GPT) mice. (B) PCR-based genotyping exhibits the offspring with indicated genotypes from intercrossing METTL3<sup>fl/fl</sup> mice and METTL3<sup>fl/wt</sup>; Alb-iCre (GPT) mice.

**A**

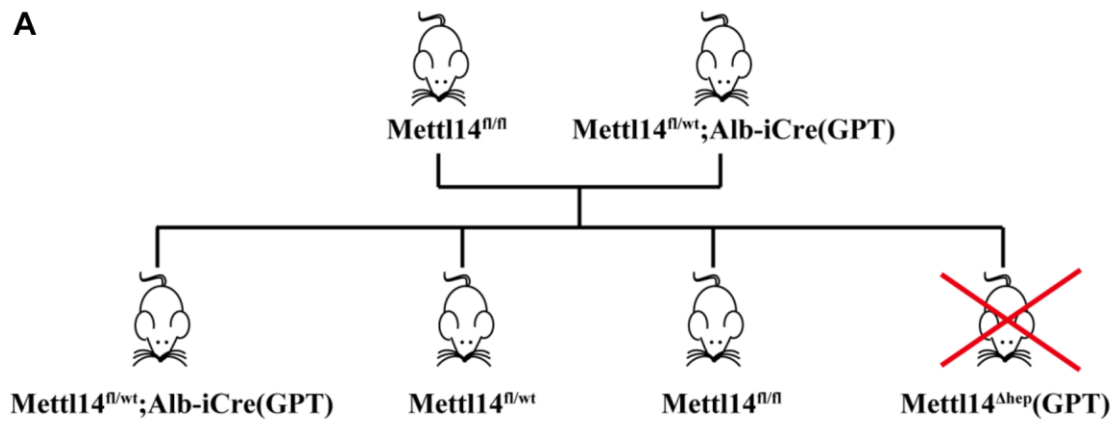

**B**

| Genotype                         | Number    | Ratio (%) |
|----------------------------------|-----------|-----------|
| $Mettl14^{fl/wt}$                | 15        | 38.46     |
| $Mettl14^{fl/wt}; Alb-iCre(GPT)$ | 12        | 20.77     |
| $Mettl14^{fl/fl}$                | 12        | 30.77     |
| $Mettl14^{\Delta hep}(GPT)$      | 0         | 0         |
| <b>Total</b>                     | <b>39</b> |           |

**C**

| Genotype                         | Number    | Ratio (%) |
|----------------------------------|-----------|-----------|
| $Mettl14^{fl/wt}$                | 6         | 28.57     |
| $Mettl14^{fl/wt}; Alb-iCre(GPT)$ | 6         | 28.57     |
| $Mettl14^{fl/fl}$                | 5         | 23.81     |
| $Mettl14^{\Delta hep}(GPT)$      | 4         | 19.05     |
| <b>Total</b>                     | <b>21</b> |           |

**Supplementary Figure 2. Hepatocyte-specific METTL14 homozygous ablation in mice by Alb-iCre mice (GPT) results in postnatal lethality.** (A) A schematic representation of the offspring with indicated genotypes from intercrossing  $METTLL14^{fl/fl}$  and  $METTLL14^{fl/wt}; Alb-iCre (GPT)$  mice. (B) PCR-based genotyping during the late postnatal period displays the number of offspring with indicated genotypes from intercrossing  $METTLL14^{fl/fl}$  mice and  $METTLL14^{fl/wt}; Alb-iCre (GPT)$  mice. (C) PCR-based genotyping during the early postnatal period exhibits the number of offspring with indicated genotypes from intercrossing  $METTLL14^{fl/fl}$  mice and  $METTLL14^{fl/wt}; Alb-iCre (GPT)$  mice.

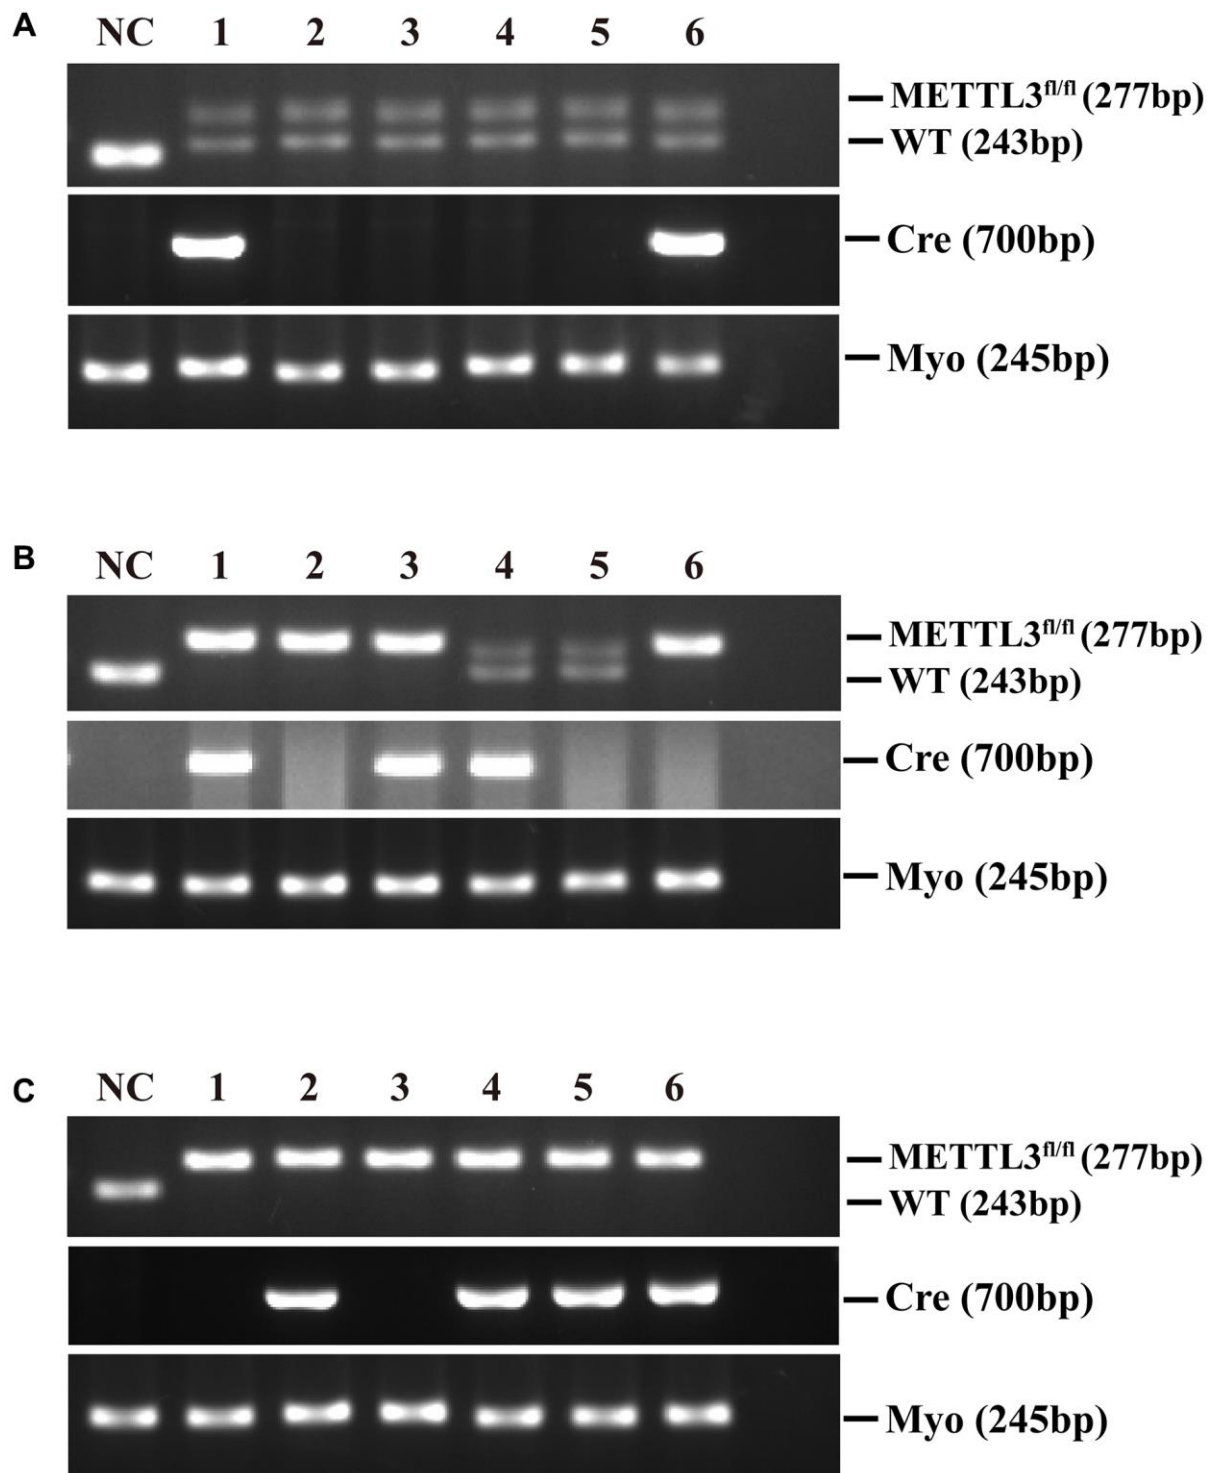

**Supplementary Figure 3. PCR-based genotyping of hepatocyte-specific METTL3 homozygous knockout (METTL3<sup>Δhep</sup>) mice by Alb-Cre mice (JAX).** (A) PCR-based genotyping displays the offspring with indicated genotypes from intercrossing METTL3<sup>fl/fl</sup> mice and Alb-Cre (JAX) mice. (B) PCR-based genotyping exhibits the offspring with indicated genotypes from intercrossing METTL3<sup>fl/fl</sup> mice and METTL3<sup>fl/wt</sup>; Alb-Cre (JAX) mice. (C) PCR-based genotyping exhibits the offspring with indicated genotypes from intercrossing METTL3<sup>fl/fl</sup> mice and METTL3<sup>fl/fl</sup>; Alb-Cre (JAX) mice.

**A**

| Genotype                      | Number | Ratio (%) |
|-------------------------------|--------|-----------|
| Control                       | 80     | 44.69     |
| Mettl14 <sup>Δhep</sup> (JAX) | 99     | 55.31     |
| Total                         | 179    |           |

**B**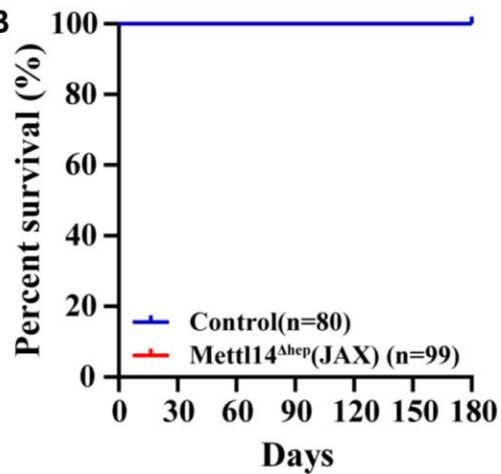

**Supplementary Figure 4. Hepatocyte-specific ablation of METTL14 in mice by Alb-Cre mice (JAX) didn't lead to postnatal lethality.** (A) PCR-based genotyping during the late postnatal period shows the presence of offspring with the genotype (i.e., METTL14<sup>fl/fl</sup>; Alb-Cre (JAX): referred to as METTL14<sup>Δhep</sup> (JAX)) from intercrossing METTL14<sup>fl/fl</sup> mice and METTL14<sup>fl/fl</sup>; Alb-Cre (JAX) mice. (B) Survival curves of control and METTL14<sup>Δhep</sup> (JAX) mice ( $n = 80-99$  for each group).

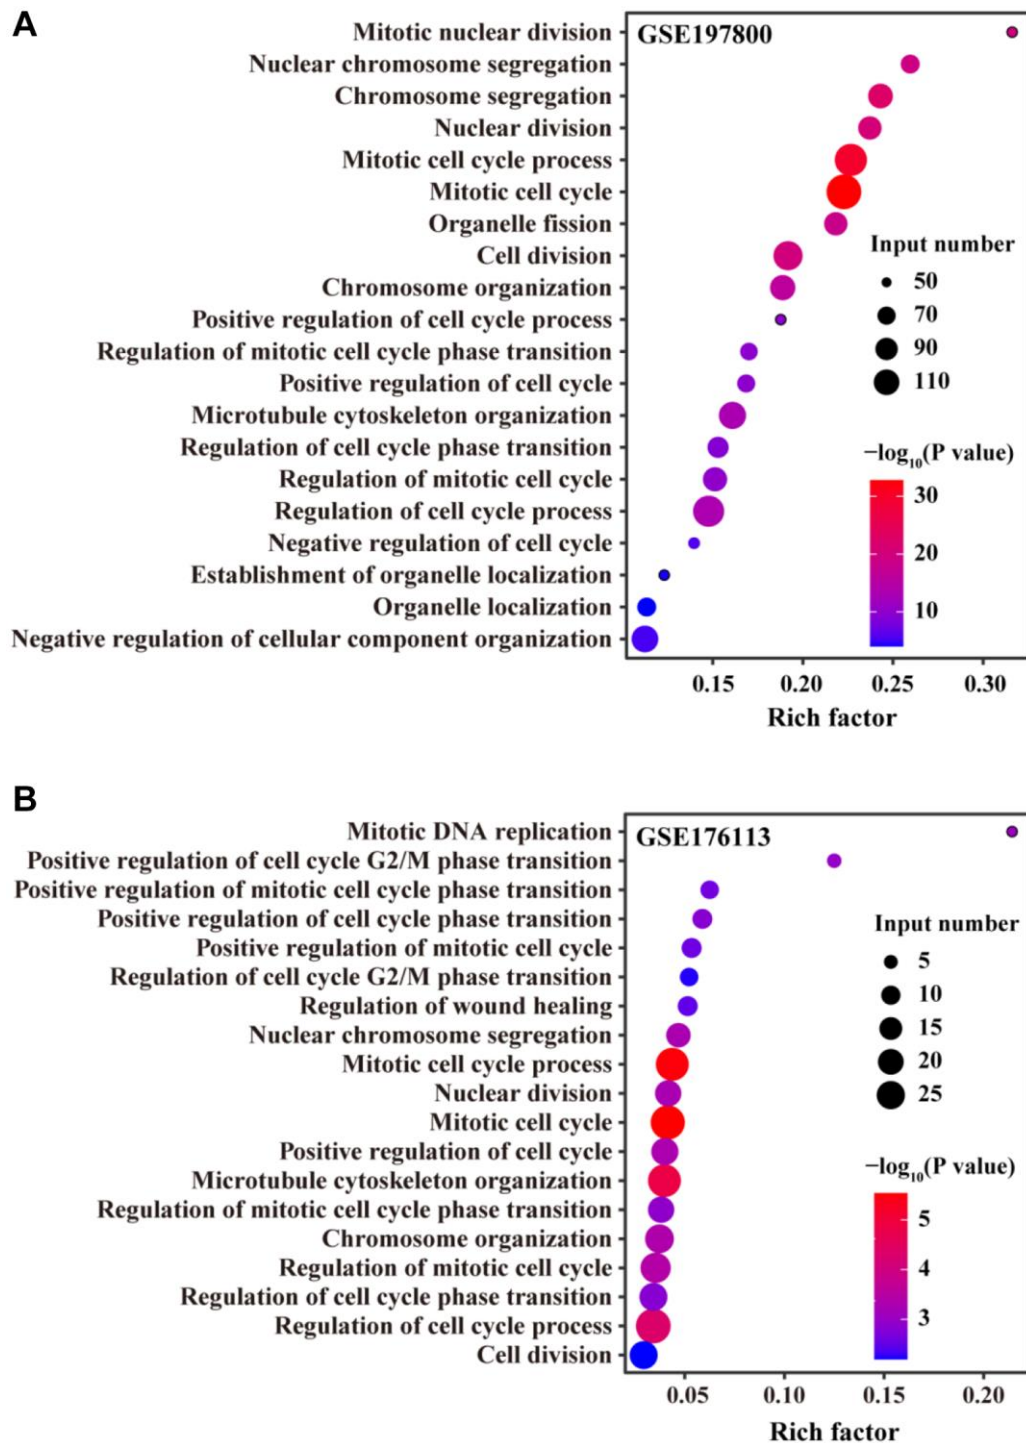

**Supplementary Figure 5.** GO term enrichment analyses of up-regulated DEGs (from RNA-seq data deposited in GEO under accession number GSE197800 (A) and GSE176113 (B)) in the liver of control and METTL3<sup>Δhep</sup> (JAX) mice.
