# Supplementary material for: Hepatocyte-specific METTL3 ablation by Alb-iCre mice (GPT), but not by Alb-Cre mice (JAX), resulted in acute liver failure (ALF) and postnatal lethality
Source: publisher site journal article supplement (doi:10.18632/aging.205753), 2024-04-22
Supplement: Supplementary file [file aging-v16i8-205753-supplementary-material-SD2.pdf]

## SUPPLEMENTARY TABLES

**Supplementary Table 1. Hierarchical clustering of differentially expressed genes (DEG) related to apoptosis in the liver of control mice and METTL3<sup>Δhep</sup> mice (GPT) at 1 week after birth from RNA-seq data deposited in GEO under accession number GSE198512.**

| Gene      | WT1     | WT2     | KO1     | KO2     | log2FC<br>(1 week) | P-value<br>(1 week) | FDR<br>(1 week) |
|-----------|---------|---------|---------|---------|--------------------|---------------------|-----------------|
| Scn2a     | 0       | 0.01553 | 0.28925 | 0.09587 | 4.52098            | 0.0012              | 0.02168         |
| Eda2r     | 0.04427 | 0.0146  | 0.42149 | 0.61588 | 4.06888            | 8.6E-05             | 0.00268         |
| Mmp12     | 0.04702 | 0       | 0.30327 | 0.19146 | 3.31959            | 0.01667             | 0.14327         |
| Ifi2712b  | 1.21898 | 1.07919 | 7.74376 | 13.976  | 3.16893            | 1.2E-11             | 2.1E-09         |
| Phlda3    | 1.9058  | 1.64398 | 16.614  | 16.4651 | 3.13858            | 1.1E-22             | 6.9E-20         |
| Fa2h      | 0.11256 | 0.16706 | 0.51854 | 1.0312  | 2.39486            | 0.00879             | 0.09171         |
| Degs11    | 0.44335 | 0.29246 | 2.34884 | 1.42915 | 2.27339            | 0.00069             | 0.01429         |
| Aen       | 1.23099 | 1.61004 | 6.70089 | 7.38882 | 2.22698            | 1.5E-16             | 5.9E-14         |
| Tnfrsf10b | 0.5294  | 0.34922 | 1.78852 | 2.17806 | 2.09844            | 3.1E-05             | 0.00116         |
| Rnf186    | 0.39301 | 1.11106 | 2.01745 | 4.57211 | 2.05332            | 0.00267             | 0.03867         |
| Zpr1      | 11.9614 | 10.0916 | 53.5242 | 43.1306 | 2.04683            | 5.3E-26             | 4.1E-23         |
| Bmp7      | 0.28661 | 0.49156 | 1.19714 | 2.06172 | 1.98764            | 0.00024             | 0.00622         |
| Isg15     | 11.2235 | 11.7478 | 44.5263 | 49.0988 | 1.94582            | 1.4E-14             | 3.9E-12         |
| Ifi206    | 0.23014 | 0.36435 | 0.91179 | 1.42905 | 1.89755            | 0.00339             | 0.04612         |
| Ifi2712a  | 9.0873  | 8.99165 | 35.1658 | 34.6889 | 1.86729            | 6.5E-09             | 6.6E-07         |
| Ifi213    | 1.67934 | 0.8982  | 4.16098 | 4.96671 | 1.75028            | 2.7E-06             | 0.00015         |
| Ifi211    | 0.94284 | 0.5442  | 2.53373 | 2.63934 | 1.72115            | 0.00187             | 0.02988         |
| Ifit1     | 1.95375 | 2.0638  | 5.05983 | 8.14336 | 1.64154            | 2E-06               | 0.00011         |
| Tgtp2     | 0.32442 | 0.41977 | 1.12665 | 1.24474 | 1.5885             | 0.01058             | 0.10415         |
| Ifi208    | 0.51596 | 0.37129 | 1.46939 | 1.31305 | 1.56742            | 0.00511             | 0.06246         |
| Ifit3     | 5.62597 | 5.7258  | 18.9572 | 16.1581 | 1.54371            | 9.1E-10             | 1.1E-07         |
| Bax       | 19.3159 | 20.1218 | 63.5529 | 57.6248 | 1.53475            | 6.9E-14             | 1.7E-11         |
| Ifit2     | 1.2673  | 1.2903  | 3.43527 | 4.37491 | 1.53168            | 4.4E-06             | 0.00022         |
| Dhx58     | 2.09324 | 1.63971 | 5.78598 | 5.29742 | 1.48817            | 1E-05               | 0.00044         |
| Oas1g     | 1.38332 | 0.63174 | 2.41839 | 3.43009 | 1.46695            | 0.00484             | 0.05975         |
| Elov17    | 0.33201 | 0.32851 | 0.94991 | 0.96054 | 1.44975            | 0.01063             | 0.1046          |
| St8sia3   | 0.16744 | 0.19881 | 0.55539 | 0.47724 | 1.40904            | 0.02147             | 0.17002         |
| Stk11     | 36.2009 | 31.8799 | 95.4247 | 92.1361 | 1.38026            | 1.7E-16             | 6.3E-14         |
| Tnfrsf12a | 14.5636 | 14.1941 | 40.1213 | 38.026  | 1.35899            | 4.2E-09             | 4.4E-07         |
| Bst2      | 44.4471 | 40.2121 | 115.107 | 113.833 | 1.35354            | 1.7E-12             | 3.3E-10         |
| Irf7      | 6.125   | 7.81658 | 19.403  | 17.9777 | 1.33654            | 1.5E-09             | 1.7E-07         |
| Oas1a     | 1.59964 | 1.50918 | 4.97001 | 3.25669 | 1.31544            | 0.00189             | 0.03003         |
| Trim6     | 0.5497  | 0.43513 | 1.35062 | 1.21239 | 1.29768            | 0.00952             | 0.09716         |
| Ifi204    | 4.42854 | 2.8407  | 9.79282 | 8.33205 | 1.23695            | 3.7E-05             | 0.00134         |
| Ythdf2    | 3.48156 | 4.10029 | 8.60634 | 9.97516 | 1.21173            | 6.5E-07             | 4.2E-05         |
| Gal3st1   | 4.62764 | 4.20966 | 13.0664 | 8.16772 | 1.17516            | 0.00012             | 0.00358         |
| Xaf1      | 3.42923 | 2.91222 | 8.18511 | 6.81662 | 1.1582             | 4.8E-05             | 0.00167         |
| Xkr6      | 1.86888 | 1.07737 | 3.14441 | 3.54015 | 1.10647            | 0.00132             | 0.02314         |
| Oas3      | 0.62398 | 0.92612 | 1.88902 | 1.64844 | 1.10198            | 0.00614             | 0.07132         |
| Smpd1     | 7.23914 | 6.55884 | 17.4383 | 13.8503 | 1.09555            | 2.9E-06             | 0.00016         |
| Cdc34     | 37.6652 | 40.1187 | 79.7164 | 93.3154 | 1.07348            | 5.7E-08             | 4.9E-06         |

|      |         |         |         |         |         |         |         |
|------|---------|---------|---------|---------|---------|---------|---------|
| Gbp3 | 4.3141  | 4.65675 | 11.0574 | 8.54349 | 1.03993 | 6.4E-05 | 0.00213 |
| Cln6 | 3.83029 | 4.50261 | 11.5828 | 6.49837 | 1.02362 | 0.00148 | 0.02537 |

**Supplementary Table 3. Heatmap (RNA-seq results deposited in NCBI GEO under the accession number GSE198512) depicts the differential expression of hepatic lipid metabolism-related genes in the liver of control mice and METTL3<sup>Δhep</sup> mice (GPT) at 2 week after birth.**

| Gene     | WT1      | WT2      | KO1      | KO2      | log2FC<br>(2 weeks) | P-value<br>(2 weeks) | FDR<br>(2 weeks) |
|----------|----------|----------|----------|----------|---------------------|----------------------|------------------|
| Ucp3     | 0.238358 | 0.208127 | 8.833701 | 7.629526 | 4.87111             | 1.12E-19             | 5.16E-17         |
| Fa2h     | 0.03345  | 0.068151 | 2.081482 | 1.476251 | 4.792228            | 6.1E-06              | 0.000154         |
| Acot1    | 0.223307 | 0.227482 | 7.465077 | 5.631563 | 4.520973            | 5.61E-17             | 1.66E-14         |
| Plin4    | 0.854425 | 0.590103 | 9.125791 | 8.554477 | 3.282266            | 1.42E-24             | 9.14E-22         |
| Cyp4a14  | 46.62122 | 66.61264 | 424.1761 | 402.966  | 2.545859            | 7.78E-27             | 6.06E-24         |
| Cox6a1   | 125.0357 | 124.3606 | 827.6662 | 787.7966 | 2.368635            | 1.03E-27             | 1.02E-24         |
| Ephx1    | 27.53036 | 26.92334 | 172.3829 | 167.3779 | 2.315567            | 7.05E-25             | 4.74E-22         |
| Elov17   | 0.124631 | 0.169281 | 0.873845 | 0.79332  | 2.177054            | 0.004941             | 0.033264         |
| Aldh1b1  | 8.63316  | 10.82695 | 55.12664 | 53.41392 | 2.156227            | 5.05E-18             | 1.87E-15         |
| Gstp1    | 31.93338 | 38.1392  | 169.6623 | 165.6048 | 1.934893            | 2.37E-15             | 5.39E-13         |
| St3gal2  | 0.758482 | 0.772664 | 3.772512 | 3.122116 | 1.83633             | 2.95E-06             | 8.25E-05         |
| Lpin1    | 4.764546 | 2.38878  | 16.06183 | 15.6806  | 1.817315            | 1.72E-08             | 9.35E-07         |
| Cox8a    | 85.80433 | 103.6129 | 463.9461 | 342.1794 | 1.750053            | 5.72E-14             | 1.11E-11         |
| Uqcr10   | 92.51009 | 91.57587 | 413.1307 | 315.5849 | 1.645475            | 4.94E-13             | 8.13E-11         |
| Cyp4a32  | 9.915687 | 13.81963 | 51.04447 | 38.97994 | 1.587408            | 5.8E-09              | 3.67E-07         |
| Ndufs4   | 8.885538 | 10.15189 | 39.75545 | 29.99852 | 1.534864            | 8.05E-09             | 4.84E-07         |
| Pla2g12a | 2.117361 | 2.10019  | 7.422914 | 6.715244 | 1.415196            | 2.67E-05             | 0.000524         |
| Aig1     | 1.297387 | 0.952363 | 4.130259 | 3.303339 | 1.384628            | 0.00025              | 0.003247         |
| Cpt2     | 14.5137  | 15.39368 | 55.28562 | 43.27706 | 1.383201            | 4.08E-09             | 2.8E-07          |
| Ndufa1   | 43.96642 | 53.09771 | 175.7555 | 139.6357 | 1.365025            | 1.39E-07             | 5.96E-06         |
| Abhd5    | 2.191525 | 2.60907  | 8.122598 | 6.991736 | 1.323826            | 4.42E-05             | 0.000791         |
| Uqcrfs1  | 43.54386 | 55.26069 | 171.0383 | 137.133  | 1.307011            | 1.68E-08             | 9.16E-07         |
| Cln6     | 2.257103 | 2.378594 | 7.230674 | 6.572622 | 1.24507             | 0.000847             | 0.008632         |
| Uqcr11   | 93.96624 | 81.68761 | 265.6622 | 238.901  | 1.190735            | 3.23E-07             | 1.2E-05          |
| Ndufb6   | 17.96163 | 20.8746  | 60.86244 | 50.7786  | 1.190636            | 3.04E-05             | 0.000585         |
| Pigh     | 0.755678 | 0.532944 | 2.012382 | 1.652725 | 1.169531            | 0.038167             | 0.144255         |
| Slc27a4  | 1.295387 | 1.319609 | 3.910555 | 3.315697 | 1.133227            | 0.002177             | 0.018207         |
| Glul     | 103.8083 | 103.6204 | 293.8769 | 272.5464 | 1.121003            | 9.75E-08             | 4.34E-06         |
| Por      | 47.90822 | 40.49286 | 121.7526 | 116.4795 | 1.101938            | 1.33E-06             | 4.11E-05         |
| Ndufa6   | 111.639  | 120.3985 | 332.1489 | 266.3101 | 1.031083            | 4.19E-06             | 0.000111         |
| Plbd1    | 11.2196  | 11.42939 | 29.46423 | 27.81046 | 1.011264            | 7.8E-05              | 0.001259         |
| Mif      | 80.02286 | 80.52849 | 220.6324 | 185.5917 | 1.005428            | 1.16E-05             | 0.000263         |
| Abca8b   | 23.3126  | 22.53592 | 15.18619 | 13.53362 | -1.00581            | 4.68E-06             | 0.000122         |
| Pik3cd   | 3.591082 | 3.813533 | 1.915132 | 2.487126 | -1.06062            | 0.001792             | 0.015637         |
| Gpat2    | 3.013291 | 3.489691 | 1.66797  | 2.126703 | -1.08843            | 0.010319             | 0.056554         |
| Mapk12   | 12.31162 | 11.91249 | 5.878602 | 7.715077 | -1.14421            | 0.000438             | 0.005186         |
| Cycs     | 5.525113 | 6.743234 | 2.503077 | 4.281489 | -1.1492             | 0.002193             | 0.018273         |
| Myo5a    | 0.377536 | 0.290261 | 0.181051 | 0.157188 | -1.31634            | 0.022796             | 0.100931         |

|          |          |          |          |          |          |          |          |
|----------|----------|----------|----------|----------|----------|----------|----------|
| Cyp3a44  | 21.96516 | 21.38043 | 10.79845 | 7.067439 | -1.62595 | 4.67E-09 | 3.14E-07 |
| Insig1   | 15.39186 | 12.68857 | 5.36348  | 5.613553 | -1.67947 | 5.83E-09 | 3.67E-07 |
| Sult2a8  | 37.30261 | 38.43599 | 14.42051 | 10.10193 | -1.97023 | 2.1E-15  | 4.85E-13 |
| Cyp2a22  | 210.8488 | 240.1306 | 54.05589 | 54.44093 | -2.37754 | 1.64E-27 | 1.51E-24 |
| Gramd1c  | 25.38095 | 26.94701 | 4.507379 | 4.304201 | -2.89678 | 9.74E-32 | 1.31E-28 |
| Sult2a6  | 4.337    | 3.534477 | 0.76022  | 0.515323 | -2.96958 | 2.23E-05 | 0.000451 |
| Cyp2b13  | 28.05246 | 25.31623 | 6.818662 | 1.622453 | -3.05736 | 0.00027  | 0.003446 |
| Sult2a5  | 20.95882 | 17.9411  | 0.838131 | 4.125752 | -3.22379 | 0.002984 | 0.023034 |
| Cyp3a41b | 0.888497 | 0.493697 | 0.035396 | 0.137106 | -3.29321 | 0.005464 | 0.035603 |
| Cyp3a16  | 40.57036 | 39.70919 | 3.67397  | 2.944363 | -3.93658 | 5.26E-47 | 2.6E-43  |
| Rdh16f2  | 39.80057 | 38.73235 | 3.811675 | 2.628526 | -3.95037 | 1.28E-39 | 4.73E-36 |

**Supplementary Table 11. Primers for qRT-PCR analysis of mouse gene expression.**

| Gene    | Forward Primer (5'-3')   | Reverse Primer (5'-3')  |
|---------|--------------------------|-------------------------|
| Abcd3   | GGCCTGCACGGTAAGAAAAGT    | CCGCAATAAGTAACAAGTAGCCT |
| Abcg8   | CTGTGGAATGGGACTGTACTTC   | GTTGGACTGACCACTGTAGGT   |
| Acaa1a  | TCTCCAGGACGTGAGGCTAAA    | CGCTCAGAAATTGGGCGATG    |
| Acaa2   | CTGCTACGAGGTGTGTTCATC    | AGCTCTGCATGACATTGCC     |
| Acad11  | TGACACCGTGGAAGTGCTAC     | CCCGGCAAGTGCTGATTCA     |
| Adh7    | ATGGGCACCGCTGGAAAAG      | TAACACGGACTTCCTTAGCCT   |
| Ang     | CCAGGCCCGTTGTTCTTGAT     | GGAAGGGAGACTTGCTCATTC   |
| Apoa2   | TGGTCGCACTGCTGGTAAC      | TTTGCCATATTCAGTCATGCTCT |
| Apoa5   | TCCTCGCAGTGTTCGCAAG      | CGAAGCTGCCTTTCAGGTTCT   |
| Apof    | ATAGCCTCCGACTCATCCTGA    | TCTGCATCTGGTATCCCAACTT  |
| Avpr1a  | TGAGTTTTCGTTCTGAGCATAACC | CCCAGCAATCTTGGGCTTTG    |
| Bax     | GTGAGCGGCTGCTTGTCTGG     | CTTCCAGATGGTGAGCGAGG    |
| Bcl2    | GAGGATTGTGGCCTTCTTTG     | CGTTATCCTGGATCCAGGTG    |
| Bcl2a1  | GGCTGAGCACTACCTTCAGTA    | TGGCGGTATCTATGGATTCCAC  |
| Bdh2    | CGACTGGACGGCAAAGTTATT    | CCTGGAGTTTGGACTCGTTGA   |
| Bik     | CCTGCATCGGCGATGAGATG     | CTCTGACACCTGTCCGGCTG    |
| Ccna2   | TGAATCACCACATGCTAT       | TAACCTCCATTTCCCTAAG     |
| Ccnb1   | CTCTGTAGTGAATATGTG       | CATCTGAACCTGTATTAG      |
| Ccnb2   | CTCCATGTAGCCTGTGTAA      | TCTTGCCGTGTCTCAGAAG     |
| Ccnd1   | TGCCATCCATGCGGAAA        | AGCGGGAAGAACTCCTCTTC    |
| Cdk1    | GACAATCAGATTAAGAAGA      | AACTATAACAAGACAGGAA     |
| Ces1b   | TACCTCCCCTGTTTTCCGAAG    | GATGCTCCGCCTGTCAATCAAT  |
| Ces1d   | ATGCGCCTCTACCCTCTGATA    | AGCAAATCTCAAGGAGCCAAG   |
| Ces1e   | CAACTTCTGGAATTGATTGGGGA  | GGGCTCCGGCATCTCTATG     |
| Cpt1a   | CTCCGCCTGAGCCATGAAG      | CACCAGTGATGATGCCATTCT   |
| Cyp7a1  | GGGATTGCTGTGGTAGTGAGC    | GGTATGGAATCAACCCGTTGTC  |
| Dolk    | CAGTGTGGGACCGATACTCCT    | CCAAGCAAAGGCATGACCA     |
| Gapdh   | CCTGCTTACCACCTTCTTG      | CATGGCCTTCCGTGTTCTTA    |
| Hmgcr   | AGCTTGCCCGAATTGTATGTG    | TCTGTTGTGAACCATGTGACTTC |
| Ki67    | AGAAGTCCAGGTCTACAG       | TCGTTGCTATTGCTAAGG      |
| Mettl3  | ATCCAGGCCATAAGAAACAG     | CTATCACTACGGAAGGTTGGG   |
| Rdh16f2 | TCTTGGGCAGAGTGTCACTTG    | TGCCAGGTATTTCTCTCCATAGA |
| Slc10a5 | CAGCTACCTGCTCGTGAAGTT    | AGGTTGACGGTAAAGTCTGTGA  |

|            |                       |                         |
|------------|-----------------------|-------------------------|
| Smpd1      | TGGGACTCCTTTGGATGGG   | CGGCGCTATGGCACTGAAT     |
| Smpd2      | TGGGACATCCCCCTACCTGAG | TAGGTGAGCGATAGCCTTTGC   |
| Smpd3      | TTCTTCGCCAGCCGCTA     | CCACCTGCACCTTGAGAAA     |
| Sptlc1     | ACGAGGCTCCAGCATAACCAT | TCAGAACGCTCCTGCAACTTG   |
| Sptlc2     | AACGGGGAAGTGAGGAACG   | CAGCATGGGTGTTTCTTCAAAG  |
| Srebf1     | TGACCCGGCTATTCCGTGA   | CTGGGCTGAGCAATACAGTTC   |
| Survivin40 | GAGGCTGGCTTCATCCACTG  | CTTTTTGCTTGTTGTTGGTCTCC |
| Triap1     | GAGTACGACCAGTGCTTCAAC | CTTGATTGCTTTCTGCACGCA   |
| Xbp1       | AGCAGCAAGTGGTGGATTG   | GAGTTTTCTCCCGTAAAAGCTGA |

**Supplementary Table 12. List of antibodies and suppliers Used for immunoblotting and immunohistochemistry.**

| <b>Antibody</b> | <b>Cat. No.</b> | <b>Isotype</b> | <b>Suppliers</b> |
|-----------------|-----------------|----------------|------------------|
| Mettl3          | ab195352        | Rabbit         | Abcam            |
| Ki67            | ab16667         | Rabbit         | Abcam            |
| Gapdh           | 10494-1-AP      | Rabbit         | Proteintech      |
