# Supplementary material for: Hepatocyte-specific METTL3 ablation by Alb-iCre mice (GPT), but not by Alb-Cre mice (JAX), resulted in acute liver failure (ALF) and postnatal lethality
Source: Aging (Albany NY). 2024 Apr 22;16(8):7217–48. doi: 10.18632/aging.205753 (PMC11087113; doi:10.18632/aging.205753)
Supplement: Supplementary Tables 2 and 4-10 [file aging-16-205753-s003.xlsx]

## Sheet: notes
Table	Figure	Mapping data table
Supplementary Table 1	Figure 4D	Hierarchical clustering of differentially expressed genes (DEG) related to apoptosis in the liver of control mice and METTL3△hep mice (GPT) at 1 week after birth from RNA-seq data deposited in GEO under accession number GSE198512.
Supplementary Table 2	Figure 4E	GO analysis of up- and downregulated genes related to apoptosis in the liver of control mice and METTL3△hep mice (GPT) at 1 week after birth from RNA-seq data deposited in GEO under accession number GSE198512.
Supplementary Table 3	Figure 3D	Heatmap (RNA-seq results deposited in NCBI GEO under the accession number GSE198512) depicts the differential expression of hepatic lipid metabolism-related genes in the liver of control mice and METTL3△hep mice (GPT) at 2 week after birth.
Supplementary Table 4	Figure 3E	GO analysis of up- and downregulated genes related with hepatic lipid metabolism in the liver of control mice and METTL3△hep mice (GPT) at 2 week after birth from RNA-seq data deposited in GEO under accession number GSE198512.
Supplementary Table 5	Figure 7C	Heatmap (RNA-seq data deposited in NCBI GEO under the accession number GSE176113 ) depicts the differential expression of genes involved in cell cycle, hepatic lipid metabolism and cytochrome P450.
Supplementary Table 6	Figure 7D	GO analysis of up- and downregulated genes derived from RNA-seq data deposited in NCBI GEO under the accession number GSE176113 related with hepatic lipid metabolism in the liver of control mice and METTL3△hep mice (JAX).
Supplementary Table 7	Figure 8A and Supplementary Figure 5A	GO analysis of up-regulated genes in the liver of control mice and METTL3△hep mice (JAX) from RNA-seq data deposited in NCBI GEO under the accession number GSE197800.
Supplementary Table 8	Figure 8B and Supplementary Figure 5B	GO analysis of up-regulated genes in the liver of control mice and METTL3△hep mice (JAX) from RNA-seq data deposited in NCBI GEO under the accession number GSE176113.
Supplementary Table 9	Figure 8C	GO analysis of up-regulated genes in the liver of control mice and METTL3△hep mice (GPT) at 1 week after birth from RNA-seq data deposited in NCBI GEO under the accession number GSE198512.
Supplementary Table 10	Figure 8D	GO analysis of up-regulated genes in the liver of control mice and METTL3△hep mice (GPT) at 2 week after birth from RNA-seq data deposited in NCBI GEO under the accession number GSE198512.
Table S7	Fig. S5A	GO term enrichment analyses based on the GO term of top20 enriched biological process for up-regulated DEGs from RNA-seq data deposited in GEO under accession number GSE197800.
Table S8	Fig. S5B	GO term enrichment analyses based on the GO term of top20 enriched biological process for up-regulated DEGs from RNA-seq data deposited in GEO under accession number GSE176113.

## Sheet: Supplementary Table 2
Supplementary Table 2. GO analysis of up- and downregulated genes related to apoptosis in the liver of control mice and METTL3Δhep mice (GPT) at 1 week after birth from RNA-seq data deposited in GEO under accession number GSE198512.
Category	Term	Description	lgPV	Log(q-value)	Symbols	InTerm_InList	Rich_factor
GO Biological Processes	GO:0035457	Cellular response to interferon-alpha	-4.45769	-1.59081	Ifi204,Ifit1,Ifit2,Oas1g,Oas1a	5/19	0.263158
GO Biological Processes	GO:0060339	Negative regulation of type I interferon-mediated signaling pathway	-5.11432	-2.18049	Mmp12,Oas1g,Ythdf2,Oas3,Oas1a,Isg15	6/24	0.25
GO Biological Processes	GO:0035456	Response to interferon-beta	-10.8303	-6.94222	Ifi204,Ifit1,Ifit3,Oas1g,Gbp3,Bst2,Trim6,Cdc34,Oas1a,Xaf1,Ifi211,Ifi213,Ifi208,Tgtp2,Ifi206	15/71	0.211268
GO Biological Processes	GO:0035458	Cellular response to interferon-beta	-9.42193	-6.01099	Ifi204,Ifit1,Ifit3,Oas1g,Gbp3,Trim6,Cdc34,Oas1a,Ifi211,Ifi213,Ifi208,Tgtp2,Ifi206	13/62	0.209677
GO Biological Processes	GO:0035455	Response to interferon-alpha	-4.42989	-1.58321	Ifi204,Ifit1,Ifit2,Oas1g,Bst2,Oas1a	6/31	0.193548
GO Biological Processes	GO:0060338	Regulation of type I interferon-mediated signaling pathway	-5.51824	-2.47527	Mmp12,Oas1g,Irf7,Trim6,Ythdf2,Oas3,Oas1a,Isg15	8/44	0.181818
GO Biological Processes	GO:0072332	Intrinsic apoptotic signaling pathway by p53 class mediator	-5.86634	-2.67724	Bax,Ifi204,Stk11,Phlda3,Aen,Eda2r,Ifi211,Ifi213,Ifi208,Ifi206	10/68	0.147059
GO Biological Processes	GO:0060340	Positive regulation of type I interferon-mediated signaling pathway	-2.04529	0	Mmp12,Irf7,Trim6	3/21	0.142857
GO Biological Processes	GO:0034340	Response to type I interferon	-2.96368	-0.446678	Smpd1,Oas1g,Irf7,Oas1a,Isg15	5/38	0.131579
GO Biological Processes	GO:1902742	Apoptotic process involved in development	-2.06748	0	Bax,Bmp7,Zpr1,Xkr6	4/39	0.102564
GO Biological Processes	GO:0032728	Positive regulation of interferon-beta production	-2.38919	-0.0189136	Oas1g,Irf7,Oas3,Oas1a,Isg15	5/51	0.0980392
GO Biological Processes	GO:0032481	Positive regulation of type I interferon production	-2.85831	-0.368186	Mmp12,Oas1g,Irf7,Dhx58,Oas3,Oas1a,Isg15	7/80	0.0875
GO Biological Processes	GO:0097193	Intrinsic apoptotic signaling pathway	-3.80717	-0.998282	Bax,Ifi204,Stk11,Phlda3,Rnf186,Aen,Scn2a,Ifi27l2b,Eda2r,Ifi211,Ifi213,Ifi208,Ifi206	13/187	0.0695187
GO Biological Processes	GO:0032479	Regulation of type I interferon production	-2.33028	0	Mmp12,Oas1g,Irf7,Dhx58,Oas3,Oas1a,Xaf1,Isg15	8/125	0.064
GO Biological Processes	GO:0006665	Sphingolipid metabolic process	-2.04155	0	Bax,St8sia3,Smpd1,Gal3st1,Elovl7,Cln6,Fa2h,Degs1l	8/140	0.0571429
GO Biological Processes	GO:0097190	Apoptotic signaling pathway	-2.65021	-0.193509	Bax,Ifi204,Stk11,Tnfrsf10b,Tnfrsf12a,Phlda3,Rnf186,Aen,Ifi27l2a,Scn2a,Ifi27l2b,Eda2r,Ifi211,Ifi213,Ifi208,Ifi206	16/341	0.0469208

## Sheet: Supplementary Table 4
Supplementary Table 4. GO analysis of up- and downregulated genes related with hepatic lipid metabolism in the liver of control mice and METTL3Δhep mice (GPT) at 2 week after birth from RNA-seq data deposited in GEO under accession number GSE198512.
Category	Term	Termname	lgPV	Log(q-value)	Symbols	InTerm_InList	Rich_factor
GO Biological Processes	GO:0001676	Long-chain fatty acid metabolic process	-9.80754	-7.13696	Cpt2,Cyp2a12,Cyp2a4,Cyp2a5,Cyp2b13,Cyp2b9,Cyp2c29,Cyp2c37,Cyp2d9,Cyp2e1,Cyp2g1,Cyp4a10,Cyp4a14,Ephx1,Gpx1,Gstm1,Gstm4,Gstp2,Gstp1,Myo5a,Pam,Slc27a4,Acot1,Hacl1,Cyp4f14,Aig1,Cyp2j9,Cyp2c50,Acot2,Cyp2a22,Cyp4a12a,Cyp2c54,Cyp2d11,Gpx4,Cyp4a32,Cyp2c69	36/130	0.276923
GO Biological Processes	GO:0033559	Unsaturated fatty acid metabolic process	-8.78028	-6.22466	Cyp2a12,Cyp2a4,Cyp2a5,Cyp2b13,Cyp2b9,Cyp2c29,Cyp2c37,Cyp2d9,Cyp2e1,Cyp2g1,Cyp4a10,Cyp4a14,Ephx1,Gpx1,Gstm1,Gstp2,Gstp1,Mif,Ptgds,Decr2,Ptges,Cyp4f14,Ptgr1,Cyp2j9,Akr1c18,Cyp2c50,Cyp2a22,Ces2e,Cyp4a12a,Cyp2c54,Cyp2d11,Gpx4,Cyp4a32,Cyp2c69	34/128	0.265625
GO Biological Processes	GO:0009062	Fatty acid catabolic process	-4.35413	-2.15181	Acads,Adipoq,Cpt2,Crat,Eci1,Lpin1,Decr2,Slc27a4,Acaa2,Hao2,Hacl1,Cyp4f14,Aig1,Mtln,Pex13,Ehhadh,Acox2,Etfa,Acot2,Ces1f	20/88	0.227273
GO Biological Processes	GO:0006631	Fatty acid metabolic process	-15.1315	-11.7205	Acads,Adipoq,Adh7,Adh5,Cpt2,Crat,Cyp2a12,Cyp2a4,Cyp2a5,Cyp2b13,Cyp2b9,Cyp2c29,Cyp2c37,Cyp2d9,Cyp2e1,Cyp2g1,Cyp4a10,Cyp4a14,Dbi,Eci1,Ephx1,Ces1c,Ces1e,Fabp2,Lpin1,Gpx1,Gstm1,Gstm4,Gstp2,Gstp1,Mif,Myo5a,Pam,Enpp1,Lypla1,Por,Ptgds,Ucp3,Decr2,Slc27a4,Acot1,Ech1,Acaa2,Hao2,Hacl1,Fads3,Ptges,Cyp4f14,Aig1,Ptgr1,Abhd5,Mtln,Ndufab1,Pex13,Ehhadh,Cyp2j9,Elovl7,Aacs,Acox2,Acacb,Cyp4v3,Akr1c18,Cyp2c50,Etfa,Ac…	83/377	0.220159
GO Biological Processes	GO:1905954	Positive regulation of lipid localization	-5.56509	-3.20206	Adipoq,Plin2,Apoe,Cyp4a10,Cyp4a14,Dbi,Ces1c,Ces1e,Il1a,Il1b,Lipg,Mif,Myb,Map2k6,Abca8b,Atp8a2,Ptges,Plin3,Plin5,Fitm1,Acacb,Xrcc4,Abca8a,Fitm2,Ces1f,Apob,Cyp4a12a,Ces1b,Cyp4a32	29/134	0.216418
GO Biological Processes	GO:0042632	Cholesterol homeostasis	-3.94171	-1.79401	Apoa4,Apoe,Tspo,Ces1c,Ces1e,Fgfr4,G6pc,Lipg,Nr1h4,Soat1,Apoa5,Lamtor1,Npc2,Tmem97,Gpr39,Insig1,Ces1f,Npc1l1,Apob,Tsku,Ces1b	21/101	0.207921
GO Biological Processes	GO:0019395	Fatty acid oxidation	-3.28932	-1.30705	Acads,Adipoq,Adh7,Adh5,Cpt2,Crat,Eci1,Por,Acaa2,Hao2,Hacl1,Mtln,Pex13,Ehhadh,Acox2,Cyp4v3,Etfa	17/82	0.207317
GO Biological Processes	GO:0008203	Cholesterol metabolic process	-4.66966	-2.40998	Apoa4,Apoe,Ces1c,Ces1e,Fdx1,Hmgcr,Hsd17b7,Lepr,Smpd1,Soat1,Srebf1,Sult2a1,Cln8,Apon,Npc2,Cln6,Sult2a8,Insig1,Ces1f,Npc1l1,Apob,Tsku,Ces1b,Sult2a5,Sult2a6,Sult2a2	26/126	0.206349
GO Biological Processes	GO:0055092	Sterol homeostasis	-3.87769	-1.7455	Apoa4,Apoe,Tspo,Ces1c,Ces1e,Fgfr4,G6pc,Lipg,Nr1h4,Soat1,Apoa5,Lamtor1,Npc2,Tmem97,Gpr39,Insig1,Ces1f,Npc1l1,Apob,Tsku,Ces1b	21/102	0.205882
GO Biological Processes	GO:0032370	Positive regulation of lipid transport	-3.77891	-1.66536	Adipoq,Apoe,Cyp4a10,Cyp4a14,Dbi,Ces1c,Ces1e,Il1a,Il1b,Lipg,Mif,Myb,Map2k6,Abca8b,Atp8a2,Ptges,Xrcc4,Abca8a,Ces1f,Cyp4a12a,Ces1b,Cyp4a32	22/111	0.198198
GO Biological Processes	GO:0016125	Sterol metabolic process	-4.33442	-2.13655	Apoa4,Apoe,Ces1c,Ces1e,Fdx1,Hmgcr,Hsd17b7,Lepr,Smpd1,Soat1,Srebf1,Sult2a1,Cln8,Apon,Npc2,Ebpl,Cln6,Sult2a8,Insig1,Ces1f,Npc1l1,Apob,Tsku,Ces1b,Sult2a5,Sult2a6,Sult2a2	27/139	0.194245
GO Biological Processes	GO:0034440	Lipid oxidation	-2.8128	-0.939674	Acads,Adipoq,Adh7,Adh5,Cpt2,Crat,Eci1,Por,Acaa2,Hao2,Hacl1,Mtln,Pex13,Ehhadh,Acox2,Cyp4v3,Etfa	17/90	0.188889
GO Biological Processes	GO:1905952	Regulation of lipid localization	-4.93651	-2.66123	Adipoq,Plin2,Apoa4,Apoe,Tspo,Crp,Cyp4a10,Cyp4a14,Dbi,Egf,Ces1c,Ces1e,Il1a,Il1b,Lipg,Mif,Myb,Map2k6,Abca8b,Atp8a2,Ptges,Lamtor1,Plin3,Plin5,Abhd5,Fitm1,Acacb,Xrcc4,Abca8a,Fitm2,Ces1f,Osbpl8,Apob,Cyp4a12a,Ces1b,Cyp4a32	36/197	0.182741
GO Biological Processes	GO:0016042	Lipid catabolic process	-5.99783	-3.60113	Acads,Adipoq,Gla,Apoa4,Apoe,Cpt2,Crat,Eci1,Ces1c,Ces1e,Lpin1,Bscl2,Lipg,Ppt1,Psap,Smpd1,Decr2,Slc27a4,Acaa2,Hao2,Hacl1,Cyp4f14,Apoa5,Aig1,Pla2g12a,Plbd1,Iah1,Mtln,Pex13,Plcd3,Ehhadh,Plpp6,Pnpla5,Sult2a8,Srd5a1,Acox2,Aspg,Akr1c18,Etfa,Hsd17b11,Bco2,Acot2,Acap1,Plaat3,Fitm2,Ces1f,Apob,Nceh1,Ces1b,Plb1	50/286	0.174825
GO Biological Processes	GO:0030258	Lipid modification	-3.56468	-1.51546	Acads,Adipoq,Adh7,Adh5,Cpt2,Crat,Cyp2e1,Cyp3a11,Cyp3a16,Dgka,Eci1,Por,St3gal2,Acaa2,Hao2,Hacl1,Mtln,Pex13,Ehhadh,Plpp6,Acox2,Cyp4v3,Etfa,Inpp5j,Slc35c1,Cyp3a44,Fa2h,Dgkh,Cyp3a41b	29/170	0.170588
GO Biological Processes	GO:0055088	Lipid homeostasis	-3.36094	-1.36774	Apoa4,Apoe,Tspo,Ces1c,Ces1e,Fgfr4,G6pc,Lipg,Nr1h4,Soat1,Cln8,Angptl4,Apoa5,Lamtor1,Abhd5,Mtln,Npc2,Tmem97,Gpr39,Pnpla5,Acox2,Fitm2,Insig1,Ces1f,Npc1l1,Apob,Tsku,Tlcd2,Ces1b,Angptl8	30/183	0.163934
GO Biological Processes	GO:0044242	Cellular lipid catabolic process	-3.3352	-1.3475	Acads,Adipoq,Gla,Cpt2,Crat,Eci1,Lpin1,Bscl2,Psap,Smpd1,Decr2,Slc27a4,Acaa2,Hao2,Hacl1,Cyp4f14,Apoa5,Aig1,Plbd1,Mtln,Pex13,Ehhadh,Plpp6,Pnpla5,Acox2,Etfa,Bco2,Acot2,Ces1f,Apob,Plb1	31/192	0.161458
GO Biological Processes	GO:0032368	Regulation of lipid transport	-2.70192	-0.86307	Adipoq,Apoa4,Apoe,Tspo,Cyp4a10,Cyp4a14,Dbi,Egf,Ces1c,Ces1e,Il1a,Il1b,Lipg,Mif,Myb,Map2k6,Abca8b,Atp8a2,Ptges,Lamtor1,Xrcc4,Abca8a,Ces1f,Cyp4a12a,Ces1b,Cyp4a32	26/166	0.156627

## Sheet: Supplementary Table 5
Supplementary Table 5. Heatmap (RNA-seq data deposited in NCBI GEO under the accession number GSE176113) depicts the differential expression of genes involved in cell cycle, hepatic lipid metabolism and cytochrome P450.
Gene	WT1	WT2	WT3	WT4	WT5	WT6	KO1	KO2	KO3	KO4	KO5	KO6	KO7	KO8	log2FC	pval	qval	Gene	Gene functional classification
Cdca5	8.98643	10.8601	3.75403	6.6144	7.55441	8.0926	15.2828	10.0959	28.5393	7.05095	17.2982	63.5034	49.6409	19.6465	1.00369	0.00189073	0.0154911	Cdca5	Cell cycle/division
Ercc6l	13.8503	30.7893	11.3745	19.9382	29.0209	15.3977	52.0128	35.3848	72.2471	30.4664	35.3519	125.956	113.428	28.6295	1.01513	0.000256647	0.00312838	Ercc6l	Cell cycle/division
Kif20a	13.7871	33.0408	35.2973	21.7155	14.7509	24.2668	51.2565	25.9782	97.4308	29.3697	26.159	346.384	177.537	46.4638	1.04011	0.0122291	0.0653933	Kif20a	Cell cycle/division
Knl1	43.3348	39.4287	21.1707	33.2887	20.4742	17.7175	44.2103	74.9991	86.293	80.7887	142.023	98.7916	86.2143	55.1895	1.04335	1.33e-06	3.96e-05	Knl1	Cell cycle/division
Brca2	177.023	180.537	94.6153	96.9927	168.455	203.247	576.554	870.594	526.556	351.426	199.024	540.278	199.068	475.377	1.04539	1.96e-05	0.00037535	Brca2	Cell cycle/division
Cldn1	707.047	904.974	1111.6	1257.75	862.991	601.759	3273.94	2399.62	2092.5	2229.24	2464.34	2351.86	2815.93	2607.37	1.0464	7.96e-21	3.7e-18	Cldn1	Cell cycle/division
Tspan8	25.5803	6.75178	46.4073	14.8442	21.1631	38.56	42.0812	48.5865	101.516	29.1835	35.6205	88.6983	199.949	59.2447	1.04746	0.00287513	0.021647	Tspan8	Cell cycle/division
Cdc20	3.03406	7.31907	12.6577	11.1265	2.23508	9.43815	23.1278	8.00221	31.9648	8.92008	10.0915	92.3142	40.6794	13.3885	1.0912	0.0086444	0.0504618	Cdc20	Cell cycle/division
Cdk1	24.6047	35.5012	31.837	34.6601	17.8353	26.2137	69.2731	38.869	96.2906	38.6981	70.2255	212.345	199.546	85.7682	1.10239	7.43e-05	0.00114387	Cdk1	Cell cycle/division
Chek1	12.3512	11.0759	9.80291	8.06874	15.6678	7.62079	21.8835	13.7879	32.5857	17.8344	41.6245	65.7503	82.6065	35.3786	1.12035	2.72e-05	0.000498822	Chek1	Cell cycle/division
Trip13	20.6378	21.0415	18.5286	9.56591	6.25665	14.583	29.1701	50.9867	68.453	19.5861	45.355	92.5142	47.0458	35.1205	1.12802	1.06e-05	0.000224775	Trip13	Cell cycle/division
Tuba8	91.3142	61.9751	79.9523	145.276	66.1878	50.5656	89.405	124.468	483.725	314.03	131.777	385.219	546.911	246.557	1.12984	0.000237388	0.0029282	Tuba8	Cell cycle/division
Klf11	30.9336	33.8794	20.3828	28.2216	34.091	39.2847	96.5693	140.344	139.349	84.5893	42.4629	138.988	88.83	84.3526	1.13253	4.46e-10	3.39e-08	Klf11	Cell cycle/division
F2rl1	20.5562	20.2666	23.6365	22.7938	31.0922	29.0882	27.4781	45.1388	206.134	31.2676	35.675	293.688	371.156	40.1227	1.14577	0.0115273	0.0625525	F2rl1	Cell cycle/division
Anxa2	209.869	169.223	201.712	255.86	253.688	254.885	328.403	465.234	1353.26	558.744	621.587	1605.52	1546.49	362.455	1.1629	2.46e-05	0.000457664	Anxa2	Cell cycle/division
Knstrn	9.96119	16.3036	12.1466	13.0038	13.1955	10.3112	42.2436	20.8064	36.3157	25.1156	33.9842	140.123	79.9898	36.6914	1.21805	3.06e-06	7.9e-05	Knstrn	Cell cycle/division
Map9	8.53305	15.9673	31.7658	9.65555	16.5731	6.25518	55.1828	38.0054	66.3439	33.0698	24.7125	76.0404	39.0512	54.2804	1.23872	6.7e-07	2.18e-05	Map9	Cell cycle/division
Ccnb1	5.981	13.5797	12.6258	19.139	8.53027	3.37124	23.6645	18.2134	60.965	16.0263	17.5678	164.902	67.841	21.7893	1.27611	0.00150118	0.0128828	Ccnb1	Cell cycle/division
Ckap2	5.15001	8.15269	6.57451	3.63835	6.1751	7.78517	19.8211	9.07075	29.9945	9.08223	20.1204	105.051	52.8362	16.013	1.2969	0.000243055	0.00298096	Ckap2	Cell cycle/division
Ccl2	9.62851	16.0894	8.59776	19.2737	10.7656	17.1812	21.4783	17.094	222.995	26.6384	39.9338	150.928	180.397	15.3319	1.31667	0.00527003	0.0346377	Ccl2	Cell cycle/division
Kifc1	10.6408	35.0439	19.3891	19.2874	28.8983	24.7691	54.9929	46.868	116.581	44.6035	51.4921	271.991	178.565	64.6338	1.32659	2.45e-05	0.000456447	Kifc1	Cell cycle/division
Ccnb2	8.65686	11.5389	13.0576	5.9912	15.8958	10.9466	38.3028	18.0285	39.8716	22.1408	17.1294	180.596	115.108	40.425	1.33832	0.000251455	0.00307451	Ccnb2	Cell cycle/division
Myc	138.961	77.2735	80.1918	119.688	57.8497	249.071	138.433	379.551	804.278	133.351	402.152	1255.96	1015.43	285.964	1.34587	0.000670089	0.0068022	Myc	Cell cycle/division
Bmyc	72.2931	39.2647	65.0992	22.5516	26.547	42.2972	149.204	249.708	132.859	129.793	147.958	111.223	207.705	196.572	1.3547	5.06e-12	6.21e-10	Bmyc	Cell cycle/division
Mcm2	50.7282	30.6471	48.8393	37.0923	45.3311	40.7784	128.69	117.377	176.651	103.027	149.002	240.813	390.334	170.757	1.3906	1.69e-13	2.7e-11	Mcm2	Cell cycle/division
Psrc1	6.64829	12.1707	14.9242	7.04844	5.14566	6.02976	17.6779	11.519	146.814	14.6478	8.6477	206.044	187.272	15.4761	1.43582	0.0122474	0.0654658	Psrc1	Cell cycle/division
Tubb2a	1013.04	629.433	621.204	991.338	1243.22	646.903	1667.06	3261.17	4893.42	9103.25	2010.54	3392.88	3549.61	4212.15	1.45595	1.4e-09	9.6e-08	Tubb2a	Cell cycle/division
Hells	29.6055	34.5277	35.3933	52.0677	52.0908	36.1418	103.531	73.0155	307.259	139.628	111.451	293.426	461.085	144.938	1.46336	9.59e-08	3.92e-06	Hells	Cell cycle/division
Dyrk3	38.1514	40.2211	24.2313	28.5892	44.8221	42.7382	112.098	96.3531	443.945	87.921	98.8303	397.243	276.721	80.3327	1.47296	1.65e-06	4.73e-05	Dyrk3	Cell cycle/division
Eppk1	2044.77	1702.26	2097.65	2306.19	1570.08	1693.2	6549.94	7934.37	11630.7	10777.4	5450.9	9291.64	12183.6	5460.97	1.47927	2.07e-24	1.8e-21	Eppk1	Cell cycle/division
Fam110a	48.1714	43.7216	71.5216	40.5045	52.2405	45.226	215.287	197.182	340.692	249.638	195.904	269.915	336.262	193.435	1.58897	5.94e-39	2.36e-35	Fam110a	Cell cycle/division
Mcm6	85.5721	48.3072	99.8022	77.8091	52.6208	54.2542	336.195	173.586	452.777	171.5	379.465	654.901	860.728	259.955	1.65905	2.05e-10	1.67e-08	Mcm6	Cell cycle/division
Spire2	7.0525	9.1837	6.28264	6.58893	9.13844	7.52418	12.574	27.758	214.527	30.3201	18.132	185.55	159.399	18.6724	1.77566	0.000228862	0.00284573	Spire2	Cell cycle/division
Esco2	8.3491	25.9945	18.1243	26.5922	9.09062	6.6947	150.1	120.527	141.507	32.533	43.5203	121.326	168.602	58.174	1.8542	1.84e-08	9.25e-07	Esco2	Cell cycle/division
Cldn4	6.38507	4.84917	9.64193	1.71177	6.81249	6.25891	11.5183	17.6503	110.711	6.90093	29.6904	149.339	247.914	21.021	1.86788	0.000826276	0.00802796	Cldn4	Cell cycle/division
Cdkn1a	18.3091	41.115	20.9746	21.1137	40.7643	30.3937	92.6468	109.861	480.913	161.874	49.9427	520.445	549.568	118.399	1.89558	1.61e-06	4.65e-05	Cdkn1a	Cell cycle/division
Smpd3	61.3542	27.3614	176.9	32.0485	49.0392	91.9249	477.866	368.168	1152.37	349.952	227.051	677.138	810.491	164.221	2.00186	2.75e-08	1.31e-06	Smpd3	Cell cycle/division
Rad51b	22.1235	53.8889	22.4327	29.6751	148.222	229.997	363.291	341.124	776.888	382.299	590.005	1011.9	727.475	658.429	2.32328	1.54e-09	1.04e-07	Rad51b	Cell cycle/division
Ces1d	4044.49	2356.79	2465.99	3299.47	3919.92	4033.98	1299.48	1175.15	581.148	948.067	1131.19	584.83	496.361	1589.56	-1.28772	8.99e-11	7.83e-09	Ces1d	Cholesterol transport/efflux
Cyp8b1	6054.65	4431.6	8461.32	6591.17	7111.11	7842.44	4294.24	2959.55	872.342	2237.92	2694.46	980.543	1055.16	2907.36	-1.22548	3.08e-06	7.94e-05	Cyp8b1	Cholesterol transport/efflux
Ces1f	3759.67	2788.64	2774.55	3707.07	3038.37	2759.08	2049.7	1712.86	543.535	1943.2	1494.39	407.525	381.296	1865.63	-1.07477	0.00054652	0.00573804	Ces1f	Cholesterol transport/efflux
Abca8a	462.226	348.925	614.112	602.646	451.66	545.796	339.452	235.285	92.7748	177.161	243.899	83.0467	101.325	261.635	-1.06519	5.65e-06	0.000132219	Abca8a	Cholesterol transport/efflux
Sult2a8	15748.3	17989.1	15832.2	16861.7	11910	9048.83	8358.24	5646.05	150.055	5157.65	3859.02	187.533	250.831	3408.92	-2.26149	0.00152053	0.0130328	Sult2a8	Cytochrome P450
Ugt1a5	978.938	443.827	720.993	758.52	2738.38	1734.68	476.955	214.818	112.634	277.107	473.537	177.135	200.173	429.537	-1.35327	1.74e-05	0.000340285	Ugt1a5	Cytochrome P450
Ugt2a3	5026.46	6058.87	5397.64	6161.19	4520.75	5316.79	2546.1	1569	1160.86	1831.31	2360.32	1032.86	1386.16	2519	-1.14803	3.05e-14	5.71e-12	Ugt2a3	Cytochrome P450
Sult2a7	17.6386	18.8566	21.6967	10.0277	204.175	100.113	4.52304	12.6356	9.26923	15.8525	30.7516	4.12672	6.43681	28.3805	-1.09918	0.0292027	0.124557	Sult2a7	Cytochrome P450
Cyp2f2	8825.19	9491.7	15099.3	11438.8	9221.54	6719.26	7560.53	6937.77	1832.64	5519.25	6946.34	1082.27	974.077	4648.2	-1.05904	0.00413686	0.0286039	Cyp2f2	Cytochrome P450
Mup1	16884.8	39700.5	58423	18557.5	2926.29	1511.2	1789.83	1352.75	33.4741	2691.19	416.548	20.911	4.57045	230.518	-4.11915	0.000135704	0.00186491	Mup1	Lipid/fatty acid metabolism
Cyp2c69	1820.28	1368.24	789	1709.62	12103	21982.5	266.161	44.3528	18.3064	28.0099	4171.56	90.4448	257.667	2110	-2.82455	0.00252547	0.0196023	Cyp2c69	Lipid/fatty acid metabolism
Cyp2c54	5824.09	4747.77	4065.06	5859.89	9003.81	8373.6	1633.28	898.693	78.3302	445.816	1378.5	66.0854	128.769	933.153	-2.73537	7.01e-07	2.26e-05	Cyp2c54	Lipid/fatty acid metabolism
Cyp2c40	1143.99	1175.48	700.706	1462.13	3786.43	4075.26	276.311	47.7303	17.7232	21.2041	1424.07	113.252	187.238	718.72	-2.50653	0.000315193	0.00369183	Cyp2c40	Lipid/fatty acid metabolism
Serpina12	875.27	923.109	1146.89	516.099	95.3749	65.6794	112.088	62.0179	33.2263	121.87	17.1294	8.10366	9.59233	22.638	-2.48445	4.12e-05	0.000698374	Serpina12	Lipid/fatty acid metabolism
Slco1a1	12694.8	16278.2	13439.7	14012.9	2756.88	3641.65	5212.31	1787.96	197.497	2189.02	558.937	308.322	207.72	795.28	-2.41563	1.7e-05	0.000334704	Slco1a1	Lipid/fatty acid metabolism
Cyp2c67	6110.56	8560.58	8629.39	10938.8	2718.78	4260.23	3250.45	2445.51	696.023	3979.88	1571.36	415.326	393.981	2025.66	-1.52031	0.000272561	0.00328358	Cyp2c67	Lipid/fatty acid metabolism
Srebf1	2235.55	1279.8	2224.59	2523.69	1856.96	1878.82	773.629	651.048	373.373	750.304	1133.68	175.132	433.815	488.16	-1.31107	1.45e-07	5.69e-06	Srebf1	Lipid/fatty acid metabolism
Fabp5	773.706	1211.22	1845.9	2943.97	1368.92	1263.83	391.48	136.951	398.301	223.627	447.395	868.111	754.211	376.437	-1.30516	7.65e-06	0.000170911	Fabp5	Lipid/fatty acid metabolism
Mfsd2a	868.329	1107.89	206.192	219.107	1181.64	1727.32	88.2036	256.514	113.305	155.012	715.374	168.257	101.587	366.888	-1.24887	0.00397566	0.027737	Mfsd2a	Lipid/fatty acid metabolism
Cyp2j5	12671	13313.7	12466.3	13867.7	16198.3	13834.2	7652.89	7139.36	1503.11	8081.91	7140.31	1156.04	1544.78	7976.49	-1.22532	0.000812666	0.00791781	Cyp2j5	Lipid/fatty acid metabolism
Cyp2c23	5524.98	6581.42	8061.26	8008.99	6930.67	6162.08	4608.65	3133.71	1319.21	2799.52	3541.3	709.289	807.764	2786.69	-1.2054	4.86e-05	0.000800506	Cyp2c23	Lipid/fatty acid metabolism
Cyp2c50	14854.2	16585.8	13078.8	16662.4	19639.9	20585.3	8896.91	8466.47	614.683	2242.28	14773.4	3398.58	5080.93	14874	-1.20487	0.00729771	0.0445749	Cyp2c50	Lipid/fatty acid metabolism
Slc10a1	10311.2	7868.33	11765.8	10441.1	12499.9	13330.8	5888.22	5698.61	1221.4	4942.12	6456.38	1371.83	1689.26	5116.27	-1.18088	0.000106428	0.0015263	Slc10a1	Lipid/fatty acid metabolism
Fasn	1628.43	812.523	1484.88	1863.13	2641.33	2247.58	510.053	487.655	327.106	989.267	956.794	188.042	526.991	656.284	-1.17441	1.08e-05	0.000229045	Fasn	Lipid/fatty acid metabolism
Bdkrb2	117.261	96.3835	105.912	49.6414	99.9166	172.018	51.6812	25.961	28.9975	15.3282	46.2494	30.4937	28.777	33.957	-1.16758	1.34e-08	7e-07	Bdkrb2	Lipid/fatty acid metabolism
Cyp4f14	6602.13	4526.73	6680.78	6280.55	7484.26	7312.33	3971.14	2784.71	1057.1	2532.93	3694.95	722.724	964.461	3313.06	-1.16434	5.18e-05	0.000844942	Cyp4f14	Lipid/fatty acid metabolism
Fabp1	83891.9	94077.7	102792	123032	128564	106299	44441.1	38743.9	19549.8	43111.5	47254.9	28889.6	18975.2	49281.3	-1.12595	3.79e-11	3.63e-09	Fabp1	Lipid/fatty acid metabolism
Acsm2	40.8824	43.3341	36.6789	22.4626	31.0721	11.5404	13.7206	13.1239	7.38283	14.351	9.25848	6.36398	10.1407	5.15594	-1.07418	1.94e-06	5.42e-05	Acsm2	Lipid/fatty acid metabolism
C2cd2l	421.308	474.922	469.237	525.026	416.761	406.306	184.232	174.1	196.503	211.735	189.455	98.6163	89.5091	168.211	-1.04954	3.81e-14	7.03e-12	C2cd2l	Lipid/fatty acid metabolism
Rgn	18902.1	20500.5	21457.2	22861.6	34048.8	28913	14756	11039.9	4007.7	8667.27	17621	2874.48	5133.5	16480.5	-1.04902	0.000382933	0.00432351	Rgn	Lipid/fatty acid metabolism
Cyp2g1	47.3937	37.6359	71.5501	77.7534	161.759	126.392	55.5771	41.825	17.242	24.2069	27.5772	18.9067	15.9293	32.3204	-1.04094	7.52e-05	0.00115362	Cyp2g1	Lipid/fatty acid metabolism
Cyp1a1	67.3796	51.1544	33.1481	35.416	46.7299	52.0057	79.0321	77.3297	135.99	91.5396	67.2573	268.377	606.348	89.1572	1.01455	0.00199081	0.0161308	Cyp1a1	Lipid/fatty acid metabolism
Acsm4	1.04697	0.678757	4.35253	5.9912	3.40625	3.12759	6.04066	7.93253	8.45761	10.2188	6.85177	11.5767	7.99361	6.468	1.02571	0.00631545	0.0398624	Acsm4	Lipid/fatty acid metabolism
Gstm2	968.615	823.208	1109.94	1078.05	1436.07	784.483	2414.17	2452.43	3575.69	2337.77	2213.71	3300.47	3424.31	3300.41	1.02708	9.71e-20	4.23e-17	Gstm2	Lipid/fatty acid metabolism
Cyp2c55	94.3251	92.9779	52.0102	166.095	28.386	26.5845	152.334	106.857	172.935	44.3156	250.142	482.795	441.309	292.739	1.12944	0.00594425	0.0379988	Cyp2c55	Lipid/fatty acid metabolism
Acot1	1140.86	843.145	596.75	1096.94	3001.96	2257.9	2992.36	4413.81	3464.35	5253.35	3322.67	6695.9	4663.31	6220.76	1.25182	2.98e-07	1.07e-05	Acot1	Lipid/fatty acid metabolism
Elovl7	6.85643	14.2585	7.58899	9.38856	12.6841	21.1166	17.2958	18.8672	78.2478	11.3836	21.5014	267.759	320.294	37.2314	1.39241	0.0101096	0.0569588	Elovl7	Lipid/fatty acid metabolism
Acot2	147.408	85.674	150.051	162.873	402.163	456.106	417.102	601.908	1765.71	700.043	591.108	4753.55	3180.16	863.023	1.73655	4.93e-05	0.000810669	Acot2	Lipid/fatty acid metabolism
Cyp2a22	80.8352	47.5766	30.6424	81.5924	3400.08	2991.74	504.71	835.063	663.976	518.321	3342.02	1563	2424.55	3567.38	1.76772	0.029447	0.125215	Cyp2a22	Lipid/fatty acid metabolism
Gstm3	1674.68	960.906	1185.8	1186.75	1543.44	740.027	5160.7	6463.2	21936.5	6117.68	2062.01	25429.4	18491.3	5538.33	1.96564	1.56e-07	6.01e-06	Gstm3	Lipid/fatty acid metabolism
Hao2	6.28184	6.78757	6.52879	5.9912	783.437	769.388	191.959	170.189	165.528	131.142	1029.48	399.395	567.546	1432.66	2.36104	0.0111033	0.060868	Hao2	Lipid/fatty acid metabolism
Cyp2b10	25.8015	14.7109	37.5529	25.9485	358.499	187.681	371.997	1221.64	438.719	414.519	733.979	1083.1	1433.71	816.601	2.58348	1.24e-07	4.92e-06	Cyp2b10	Lipid/fatty acid metabolism

## Sheet: Supplementary Table 6
Supplementary Table 6. GO analysis of up- and downregulated genes derived from RNA-seq data deposited in NCBI GEO under the accession number GSE176113 related with hepatic lipid metabolism in the liver of control mice and METTL3Δhep mice (JAX).
Category	Term	Description	lgPV	Log(q-value)	Symbols	InTerm_InList	Rich_factor
GO Biological Processes	GO:0019369	Arachidonic acid metabolic process	-7.96574	-4.5548	Cyp2b10,Cyp2c40,Cyp2f2,Cyp2g1,Cyp2j5,Cyp4f14,Cyp2c55,Cyp2c50,Cyp2c23,Cyp2a22,Cyp2c54,Cyp2c67,Cyp2c69	13/79	0.164557
GO Biological Processes	GO:0001676	Long-chain fatty acid metabolic process	-9.51462	-5.80264	Cyp1a1,Cyp2b10,Cyp2c40,Cyp2f2,Cyp2g1,Cyp2j5,Gstm2,Gstm3,Acot1,Cyp4f14,Cyp2c55,Cyp2c50,Acot2,Cyp2c23,Cyp2a22,Cyp2c54,Cyp2c67,Cyp2c69	18/130	0.138462
GO Biological Processes	GO:0033559	Unsaturated fatty acid metabolic process	-7.03776	-3.75175	Cyp2b10,Cyp2c40,Cyp2f2,Cyp2g1,Cyp2j5,Gstm2,Gstm3,Cyp4f14,Cyp2c55,Cyp2c50,Cyp2c23,Cyp2a22,Cyp2c54,Cyp2c67,Cyp2c69	15/128	0.117188
GO Biological Processes	GO:0042304	Regulation of fatty acid biosynthetic process	-2.31948	-0.0598052	Fabp5,Rgn,Srebf1,Pdk4,Trib3	5/52	0.0961538
GO Biological Processes	GO:0090207	Regulation of triglyceride metabolic process	-2.28391	-0.0442077	Rgn,Srebf1,Thrsp,Serpina12,Mfsd2a	5/53	0.0943396
GO Biological Processes	GO:0072330	Monocarboxylic acid biosynthetic process	-3.84351	-0.858538	Cyp1a1,Cyp7b1,Cyp8b1,Fasn,Gstm2,Gstm3,Rdh16,Chst14,Elovl7,Acsm2,Acsm4,Dhrs9	12/158	0.0759494
GO Biological Processes	GO:0019217	Regulation of fatty acid metabolic process	-2.5987	-0.16273	Fabp1,Fabp5,Rgn,Sox9,Srebf1,Pdk4,Mfsd2a,Trib3	8/111	0.0720721
GO Biological Processes	GO:0015718	Monocarboxylic acid transport	-3.06339	-0.39281	Bdkrb2,Fabp1,Fabp5,Myc,Slc10a1,Slco1a1,Mfsd2a,Slc16a11,Slc16a5,Abcc4	10/141	0.070922
GO Biological Processes	GO:0006631	Fatty acid metabolic process	-6.80866	-3.61956	Cyp1a1,Cyp2b10,Cyp2c40,Cyp2f2,Cyp2g1,Cyp2j5,Fasn,Gstm2,Gstm3,Acot1,Hao2,Cyp4f14,Cyp2c55,Elovl7,Ankrd23,Ces1d,Cyp2c50,Acot2,Cyp2c23,Cyp2a22,Acsm2,Acsm4,Ces1f,Cyp2c54,Cyp2c67,Cyp2c69	26/377	0.0689655
GO Biological Processes	GO:0046394	Carboxylic acid biosynthetic process	-4.57682	-1.53385	Cyp1a1,Cyp7b1,Cyp8b1,Fasn,Gstm2,Gstm3,Mthfr,Rdh16,Rgn,Chst14,Elovl7,Psat1,Cyp2c23,Acsm2,Acsm4,Phgdh,Dhrs9	17/250	0.068
GO Biological Processes	GO:0010565	Regulation of cellular ketone metabolic process	-3.13459	-0.446031	Fabp1,Fabp5,Rdh16,Rgn,Sox9,Srebf1,Pdk4,Mfsd2a,Ces1d,Trib3,Ces1f	11/163	0.0674847
GO Biological Processes	GO:0016053	Organic acid biosynthetic process	-4.51097	-1.49796	Cyp1a1,Cyp7b1,Cyp8b1,Fasn,Gstm2,Gstm3,Mthfr,Rdh16,Rgn,Chst14,Elovl7,Psat1,Cyp2c23,Acsm2,Acsm4,Phgdh,Dhrs9	17/253	0.0671937
GO Biological Processes	GO:0046890	Regulation of lipid biosynthetic process	-3.12998	-0.446031	Fabp5,Mup1,Rdh16,Rgn,Srebf1,Thrsp,Pdk4,Smpd3,Serpina12,Mfsd2a,Ces1d,Trib3,Ces1f	13/216	0.0601852
GO Biological Processes	GO:0044283	Small molecule biosynthetic process	-5.63174	-2.52182	Atf3,Cyp1a1,Cyp7b1,Cyp8b1,Fasn,G6pc2,Gstm2,Gstm3,Mthfr,Rdh16,Rgn,Srebf1,Nt5e,Pgp,Serpina12,Chst14,Elovl7,Ces1d,Psat1,Pgd,Cyp2c23,Acsm2,Acsm4,Ces1f,Phgdh,Dhrs9	26/435	0.0597701
GO Biological Processes	GO:0062013	Positive regulation of small molecule metabolic process	-2.67228	-0.163717	Fabp1,Mas1,Mup1,Myc,Rdh16,Rgn,Src,Srebf1,Ppp1r3g,Ces1d,Ces1f	11/186	0.0591398
GO Biological Processes	GO:0045834	Positive regulation of lipid metabolic process	-2.11018	0	Fabp1,Mup1,Rdh16,Rgn,Src,Srebf1,Smpd3,Mfsd2a,Ces1d,Ces1f	10/191	0.052356
GO Biological Processes	GO:0062012	Regulation of small molecule metabolic process	-2.88414	-0.274828	Fabp1,Fabp5,Mas1,Mup1,Myc,Rdh16,Rgn,Sox9,Src,Srebf1,Pdk4,Pgp,Serpina12,Ppp1r3g,Mfsd2a,Ces1d,Trib3,Ces1f	18/379	0.0474934
GO Biological Processes	GO:0015711	Organic anion transport	-2.41415	-0.092575	Bdkrb2,Fabp1,Fabp5,Myc,Slc10a1,Slco1a1,Slc1a4,Mfsd2a,Slc16a11,Slc16a5,Slc22a29,Slc13a5,Abcc4,Slc4a9,Slc22a30,Slc22a28	16/354	0.0451977
GO Biological Processes	GO:0008610	Lipid biosynthetic process	-3.31306	-0.568746	Ang,Cyp1a1,Cyp7b1,Cyp8b1,Fasn,Gstm2,Gstm3,Hsd3b3,Fabp5,Rdh16,Srebf1,Gal3st1,Socs6,Serpina12,Elovl7,Ces1d,Abca8a,Dolk,Gpat3,Mogat2,Acsm2,Acsm4,Ces1f,Dhrs9	24/534	0.0449438
GO Biological Processes	GO:0019216	Regulation of lipid metabolic process	-2.61652	-0.16273	Fabp1,Fabp5,Mup1,Rdh16,Rgn,Sox9,Src,Srebf1,Thrsp,Pdk4,Smpd3,Serpina12,Mfsd2a,Adgrf1,Ces1d,Golm1,Trib3,Ces1f	18/401	0.0448878

## Sheet: Supplementary Table 7
Supplementary Table 7. GO analysis of up-regulated genes in the liver of control mice and METTL3Δhep mice (JAX) from RNA-seq data deposited in NCBI GEO under the accession number GSE197800.
Category	Term	Description	LogP	Log(q-value)	Symbols	InTerm_InList
GO Biological Processes	GO:0000278	Mitotic cell cycle	-32.7991	-28.61	Birc5,App,Rhoc,Bard1,Bub1,Bub1b,Ccna2,Ccnb2,Ccnd2,Ccne1,Cdc25a,Cdc25b,Cdk1,Cdc45,Cdkn1a,Cenpa,Chek1,E2f1,E2f3,Smc2,Foxm1,Ier3,Incenp,Kif11,Kif3b,Kif4,Kifc5b,Stmn1,Arhgef2,Lig1,Mcm3,Mcm2,Mcm4,Mcm6,Muc1,Mybl1,Myc,Nek2,Nes,Plk1,Pole,Kif20a,Rad51,Ran,Rtkn,Exoc4,Stil,Aurka,Tacc3,Ttk,Tuba1b,Tubb2a,Tubb5,Unc119,Cenph,Iqgap1,Knstrn,Cdca8,Tuba8,Spag5,Ncapg,Mad2l1,Gpr132,Psrc1,Xrcc2,Ttyh1,Smpd3,Rrs1,Ska1,C…	129/579	0.222798
GO Biological Processes	GO:1903047	Mitotic cell cycle process	-29.6699	-25.7818	Birc5,App,Rhoc,Bard1,Bub1,Bub1b,Ccna2,Ccnb2,Ccnd2,Ccne1,Cdc25a,Cdc25b,Cdk1,Cdc45,Cdkn1a,Cenpa,Chek1,E2f1,E2f3,Smc2,Foxm1,Ier3,Incenp,Kif11,Kif3b,Kif4,Kifc5b,Stmn1,Arhgef2,Lig1,Mcm3,Mcm2,Mcm4,Mcm6,Muc1,Myc,Nek2,Nes,Plk1,Pole,Kif20a,Rad51,Ran,Rtkn,Exoc4,Stil,Aurka,Tacc3,Ttk,Unc119,Cenph,Iqgap1,Knstrn,Cdca8,Spag5,Ncapg,Mad2l1,Gpr132,Psrc1,Smpd3,Rrs1,Cul7,Mad2l1bp,Nuf2,Ndc80,Cdt1,Anp32b,Cdca5,Zwilch,…	114/503	0.22664
GO Biological Processes	GO:0007059	Chromosome segregation	-22.6751	-18.9631	Birc5,Bub1,Aspm,Ccnb2,Ccne1,Cpeb1,Smc2,Incenp,Kif11,Kif3b,Kif4,Kifc5b,Nek2,Plk1,Ran,Aurka,Top2a,Ttk,Tubb5,Cenph,Knstrn,Cdca8,Spag5,Ncapg,Mad2l1,Psrc1,Rrs1,Sac3d1,Ska1,Ntmt1,Nuf2,Ndc80,Cdt1,Cdca5,Sgo2a,Arl8a,Trip13,Cenps,Spdl1,Oip5,Kif23,Fam83d,Esco2,Tpx2,Cenpn,Sgo1,Ndc1,Kif2c,Ncapg2,Knl1,Haus8,Mnd1,Misp,Tex14,Champ1,Cenpi,Espl1,Cdc20,Nusap1,Cdca2,Kif22,Flna,Kntc1,Map9,Cdk5rap2,Ncaph,Dlgap5,Ska3,C…	79/325
GO Biological Processes	GO:0000280	Nuclear division	-20.5904	-17.0034	Birc5,Aspm,Ccnb2,Ccne1,Cdc25b,Cpeb1,Ddx4,Fanca,Smc2,Incenp,Kif11,Kif3b,Kifc5b,Lif,Tesmin,Mybl1,Nek2,Plk1,Rad51,Ran,Aurka,Top2a,Ttk,Knstrn,Cdca8,Spag5,Ncapg,Mad2l1,Psrc1,Smpd3,Rrs1,Fignl1,Nuf2,Ndc80,Cdt1,Cdca5,Spire1,Sgo2a,Ube2c,Trip13,Cenps,Spdl1,Kif23,Tdrd12,Tpx2,Sgo1,Reep4,Ndc1,Kif2c,Hsf2bp,Ncapg2,Mnd1,Misp,Tex14,Champ1,Cenpi,Espl1,Cdc20,Nusap1,Kif22,Flna,Kntc1,Map9,Ncaph,Cenpe,Prc1,Spire2,Eme1…	74/312
GO Biological Processes	GO:0000819	Sister chromatid segregation	-20.0859	-16.5958	Birc5,Smc2,Incenp,Kif11,Kif3b,Kifc5b,Nek2,Plk1,Ran,Top2a,Knstrn,Cdca8,Spag5,Ncapg,Mad2l1,Psrc1,Rrs1,Nuf2,Ndc80,Cdt1,Cdca5,Spdl1,Kif23,Tpx2,Sgo1,Kif2c,Ncapg2,Misp,Tex14,Champ1,Cenpi,Espl1,Cdc20,Nusap1,Kif22,Flna,Kntc1,Map9,Ncaph,Cenpe,Prc1,Ccnb1,Kif14,Nsl1,Snhg15,Kifc1	46/133
GO Biological Processes	GO:0051301	Cell division	-19.8547	-16.4908	Birc5,Arf6,Rhoc,Bub1,Bub1b,Aspm,Ccna2,Ccnb2,Ccnd2,Ccne1,Cdc25a,Cdc25b,Cdk1,Cdc7,Cenpa,Smc2,Cdca3,Hells,Incenp,Cuzd1,Kif11,Stmn1,Arhgef2,Lig1,Nedd9,Nek2,Plk1,Kif20a,Ran,Rtkn,Exoc4,Aurka,Tacc3,Tgfb2,Top2a,Unc119,Iqgap1,Knstrn,Cdca8,Septin11,Ppp2r2d,Spag5,Mad2l1,Psrc1,Sac3d1,Ska1,Cul7,Nuf2,Ndc80,Cdca5,Kmt5a,Zwilch,Spire1,Sgo2a,Ube2c,Arl8a,Anln,Cenps,Spdl1,Oip5,Kif23,Fam83d,Tdrd12,Sapcd2,Tpx2,Sgo1,Re…	98/511
GO Biological Processes	GO:0000070	Mitotic sister chromatid segregation	-19.8348	-16.4908	Birc5,Smc2,Incenp,Kif11,Kif3b,Kifc5b,Nek2,Plk1,Ran,Knstrn,Cdca8,Spag5,Ncapg,Mad2l1,Psrc1,Rrs1,Nuf2,Ndc80,Cdt1,Cdca5,Spdl1,Kif23,Tpx2,Sgo1,Kif2c,Ncapg2,Misp,Tex14,Champ1,Cenpi,Espl1,Cdc20,Nusap1,Kif22,Flna,Kntc1,Map9,Ncaph,Cenpe,Prc1,Ccnb1,Kif14,Nsl1,Snhg15,Kifc1	45/129
GO Biological Processes	GO:0140014	Mitotic nuclear division	-19.4358	-16.1498	Birc5,Smc2,Incenp,Kif11,Kif3b,Kifc5b,Nek2,Plk1,Ran,Aurka,Knstrn,Cdca8,Spag5,Ncapg,Mad2l1,Psrc1,Smpd3,Rrs1,Nuf2,Ndc80,Cdt1,Cdca5,Ube2c,Spdl1,Kif23,Tpx2,Sgo1,Reep4,Kif2c,Ncapg2,Misp,Tex14,Champ1,Cenpi,Espl1,Cdc20,Nusap1,Kif22,Flna,Kntc1,Map9,Ncaph,Cenpe,Prc1,Ccnb1,Kif14,Nsl1,Snhg15,Kifc1	49/155
GO Biological Processes	GO:0098813	Nuclear chromosome segregation	-19.1538	-15.919	Birc5,Aspm,Ccnb2,Ccne1,Cpeb1,Smc2,Incenp,Kif11,Kif3b,Kif4,Kifc5b,Nek2,Plk1,Ran,Aurka,Top2a,Ttk,Knstrn,Cdca8,Spag5,Ncapg,Mad2l1,Psrc1,Rrs1,Nuf2,Ndc80,Cdt1,Cdca5,Trip13,Cenps,Spdl1,Kif23,Fam83d,Tpx2,Sgo1,Ndc1,Kif2c,Ncapg2,Knl1,Mnd1,Misp,Tex14,Champ1,Cenpi,Espl1,Cdc20,Nusap1,Kif22,Flna,Kntc1,Map9,Ncaph,Cenpe,Prc1,Eme1,Ccnb1,Map1s,Kif14,Nsl1,Snhg15,Kifc1	61/235
GO Biological Processes	GO:0048285	Organelle fission	-18.3651	-15.176	Birc5,Aspm,Ccnb2,Ccne1,Cdc25b,Cpeb1,Ddx4,Fanca,Smc2,Incenp,Kif11,Kif3b,Kifc5b,Lif,Tesmin,Mybl1,Nek2,Plk1,Rad51,Ran,Aurka,Top2a,Ttk,Knstrn,Cdca8,Spag5,Ncapg,Mad2l1,Psrc1,Smpd3,Rrs1,Fignl1,Nuf2,Ndc80,Cdt1,Cdca5,Spire1,Sgo2a,Ube2c,Trip13,Cenps,Spdl1,Kif23,Tdrd12,Tpx2,Sgo1,Reep4,Ndc1,Kif2c,Hsf2bp,Ncapg2,Mnd1,Misp,Tex14,Champ1,Cenpi,Espl1,Cdc20,Nusap1,Kif22,Flna,Kntc1,Map9,Ncaph,Cenpe,Prc1,Spire2,Eme1…	74/339
GO Biological Processes	GO:0051276	Chromosome organization	-16.0671	-12.9194	Apex1,Birc5,Bub1,Bub1b,Ccne1,Cdk1,Cdc45,Cenpa,Cpeb1,Smc2,H1f3,Incenp,Kif11,Kif3b,Kifc5b,Mcm3,Mcm2,Mcm4,Mcm5,Mcm6,Myc,Nek2,Plk1,Rad51,Ran,Tert,Top2a,Cenph,Knstrn,Cdca8,Nhp2,Spag5,Ncapg,Mad2l1,Psrc1,Rrs1,Nuf2,Ndc80,Cdt1,Cdca5,Gar1,Sgo2a,Ctc1,Trip13,Spdl1,Oip5,Kif23,Esco2,Tpx2,Cenpn,Sgo1,Ndc1,Kif2c,Ncapg2,Mnd1,Gins3,Misp,Tex14,Champ1,Cenpi,Pelo,Espl1,Cdc20,Nusap1,Kif22,Flna,Pif1,Kntc1,Map9,Ncaph,Dlg…	81/429
GO Biological Processes	GO:1902850	Microtubule cytoskeleton organization involved in mitosis	-13.857	-10.7471	Birc5,Cdk1,Cenpa,Incenp,Kif11,Kif3b,Kif4,Kifc5b,Stmn1,Arhgef2,Nek2,Plk1,Stil,Aurka,Tacc3,Cenph,Cdca8,Mad2l1,Nuf2,Ndc80,Spdl1,Kif23,Sapcd2,Tpx2,Fam110a,Misp,Cdc20,Nusap1,Flna,Map9,Cdk5rap2,Dlgap5,Cenpe,Prc1,Ccnb1,Map1s,Snhg15,Kifc1	38/131
GO Biological Processes	GO:0010564	Regulation of cell cycle process	-13.383	-10.3079	Actb,Apex1,Birc5,App,Bard1,Btc,Bub1,Bub1b,Ccnd2,Cdc25a,Cdc25b,Cdk1,Cdc7,Cdkn1a,Cdkn2b,Chek1,Cyp1a1,E2f1,Fem1b,Fen1,Smc2,Prmt2,Ier3,Incenp,Kif11,Kif3b,Lif,Mki67,Muc1,Myc,Nek2,Mybbp1a,Plk1,Kif20a,Rad51,Rad51ap1,Rad51b,Rbl1,Rrm1,Ccl2,Stil,Slfn1,Sox9,Plk4,Aurka,Tacc3,Tert,Tnf,Ttk,Ywhah,Ubd,Dbf4,Plpp2,Knstrn,Cdca8,Spag5,Ncapg,Mad2l1,Gpr132,Psrc1,Smpd3,Cul7,Mad2l1bp,Nuf2,Ndc80,Cdt1,Anp32b,Cdca5,Zwilch,…	108/731
GO Biological Processes	GO:0000226	Microtubule cytoskeleton organization	-13.2366	-10.1936	Birc5,Aspm,Ccnb2,Cdk1,Cenpa,Dag1,Incenp,Kif11,Kif3a,Kif3b,Kif4,Kifc5b,Stmn1,Arhgef2,Limk2,Map1b,Nek2,Neurl1a,Nin,Plk1,Kif20a,Sgk1,Stil,Slc16a1,Plk4,Aurka,Tacc3,Tuba1b,Tubb2a,Tubb5,Cenph,Knstrn,Cdca8,Tuba8,Spag5,Ccdc120,Mad2l1,Psrc1,Xrcc2,Sac3d1,Cul7,Ntmt1,Nuf2,Ndc80,Tubb6,Pclaf,Spire1,Mtcl1,Pierce1,Aunip,Spdl1,Spef1,Kif23,Wdr73,Sapcd2,Tpx2,Sgo1,Pard3b,Kif2c,Fam110a,Haus8,Ninl,Misp,Gas8,Spata7,Dna…	89/553
GO Biological Processes	GO:0007051	Spindle organization	-12.9802	-9.96723	Birc5,Aspm,Ccnb2,Incenp,Kif11,Kif3b,Kif4,Kifc5b,Stmn1,Limk2,Nek2,Plk1,Stil,Aurka,Tacc3,Tubb5,Cenph,Knstrn,Cdca8,Spag5,Sac3d1,Ntmt1,Nuf2,Ndc80,Aunip,Kif23,Tpx2,Fam110a,Haus8,Misp,Espl1,Cdc20,Flna,Map9,Dlgap5,Cenpe,Prc1,Ccnb1,Map1s,Snhg15,Kifc1	41/159
GO Biological Processes	GO:0007052	Mitotic spindle organization	-12.0126	-9.02761	Birc5,Incenp,Kif11,Kif3b,Kif4,Kifc5b,Stmn1,Nek2,Plk1,Stil,Aurka,Tacc3,Cenph,Cdca8,Nuf2,Ndc80,Kif23,Tpx2,Fam110a,Misp,Cdc20,Flna,Map9,Dlgap5,Cenpe,Prc1,Ccnb1,Map1s,Snhg15,Kifc1	30/96
GO Biological Processes	GO:1905818	Regulation of chromosome separation	-11.4213	-8.46262	Birc5,Bub1,Bub1b,Smc2,Incenp,Plk1,Ttk,Cdca8,Ncapg,Mad2l1,Mad2l1bp,Nuf2,Ndc80,Zwilch,Ube2c,Trip13,Spdl1,Ncapg2,Tex14,Cdc20,Kntc1,Cdk5rap2,Ncaph,Cenpe,Ccnb1	25/71
GO Biological Processes	GO:0071174	Mitotic spindle checkpoint signaling	-10.6121	-7.67829	Birc5,Bub1,Bub1b,Plk1,Stil,Ttk,Mad2l1,Mad2l1bp,Nuf2,Ndc80,Zwilch,Trip13,Spdl1,Tex14,Cdc20,Kntc1,Cenpe	17/35
GO Biological Processes	GO:0031577	Spindle checkpoint signaling	-10.3635	-7.45319	Birc5,Bub1,Bub1b,Plk1,Stil,Ttk,Mad2l1,Mad2l1bp,Nuf2,Ndc80,Zwilch,Trip13,Spdl1,Tex14,Cdc20,Kntc1,Cenpe	17/36
GO Biological Processes	GO:0033047	Regulation of mitotic sister chromatid segregation	-10.2991	-7.41102	Birc5,Bub1,Bub1b,Cdk1,Incenp,Plk1,Ttk,Cdca8,Mad2l1,Mad2l1bp,Nuf2,Ndc80,Zwilch,Trip13,Spdl1,Tex14,Cdc20,Kntc1,Cdk5rap2,Cenpe,Ccnb1	21/56
GO Biological Processes	GO:0007346	Regulation of mitotic cell cycle	-10.1765	-7.30959	Actb,Apex1,Birc5,App,Bard1,Btc,Btg2,Btg3,Bub1,Bub1b,Ccnd2,Cdc25a,Cdc25b,Cdk1,Cdc7,Cdkn1a,Cdkn2b,Chek1,Cyp1a1,E2f1,Prmt2,Ier3,Incenp,Mki67,Sik1,Muc1,Myc,Prkca,Plk1,Rad51b,Rbl1,Rrm1,Ccl2,Stil,Slfn1,Tert,Tnf,Ttk,Ywhah,Ubd,Asns,Dbf4,Iqgap1,Cdca8,Mad2l1,Gpr132,Smpd3,Cul7,Mad2l1bp,Nuf2,Ndc80,Anp32b,Cdca5,Zwilch,Ube2c,Ctc1,Trip13,Spdl1,Dtl,Ticrr,Tex14,Gpnmb,Cdc20,Nusap1,Cdca2,Lsm10,Kntc1,Cdk5rap2,Dlgap5…	77/509
GO Biological Processes	GO:0007094	Mitotic spindle assembly checkpoint signaling	-10.0076	-7.18025	Birc5,Bub1,Bub1b,Plk1,Ttk,Mad2l1,Mad2l1bp,Nuf2,Ndc80,Zwilch,Trip13,Spdl1,Tex14,Cdc20,Kntc1,Cenpe	16/33
GO Biological Processes	GO:0071173	Spindle assembly checkpoint signaling	-10.0076	-7.18025	Birc5,Bub1,Bub1b,Plk1,Ttk,Mad2l1,Mad2l1bp,Nuf2,Ndc80,Zwilch,Trip13,Spdl1,Tex14,Cdc20,Kntc1,Cenpe	16/33
GO Biological Processes	GO:0010965	Regulation of mitotic sister chromatid separation	-9.96265	-7.15377	Birc5,Bub1,Bub1b,Incenp,Plk1,Ttk,Cdca8,Mad2l1,Mad2l1bp,Nuf2,Ndc80,Zwilch,Ube2c,Trip13,Spdl1,Tex14,Cdc20,Kntc1,Cdk5rap2,Cenpe,Ccnb1	21/58
GO Biological Processes	GO:0090068	Positive regulation of cell cycle process	-9.86922	-7.07806	Apex1,Birc5,App,Btc,Ccnd2,Cdc25a,Cdc25b,Cdk1,Cdc7,Cyp1a1,Fen1,Smc2,Incenp,Kif3b,Rad51ap1,Rad51b,Rrm1,Stil,Plk4,Aurka,Tert,Tnf,Dbf4,Cdca8,Spag5,Ncapg,Mad2l1,Smpd3,Mad2l1bp,Ndc80,Anp32b,Cdca5,Sgo2a,Ube2c,Kif23,Fam83d,Ncapg2,Dtl,Cdc20,Nusap1,E2f8,Lsm10,Ncaph,Dyrk3,Cenpe,Plcg2,Kif20b,Ccnb1,Kif14	49/261
GO Biological Processes	GO:0051983	Regulation of chromosome segregation	-9.80801	-7.03389	Actb,Birc5,Bub1,Bub1b,Cdk1,Smc2,Incenp,Mki67,Plk1,Tacc3,Ttk,Cdca8,Ncapg,Mad2l1,Mad2l1bp,Nuf2,Ndc80,Zwilch,Ube2c,Trip13,Spdl1,Kif2c,Ncapg2,Tex14,Cdc20,Cdca2,Kntc1,Cdk5rap2,Ncaph,Rmi2,Cenpe,Ccnb1	32/129
GO Biological Processes	GO:1901990	Regulation of mitotic cell cycle phase transition	-9.77533	-7.03223	Actb,Apex1,Birc5,App,Bard1,Bub1,Bub1b,Ccnd2,Cdc25a,Cdc25b,Cdk1,Cdc7,Cdkn1a,Cdkn2b,Chek1,Cyp1a1,E2f1,Prmt2,Ier3,Incenp,Muc1,Plk1,Rad51b,Rbl1,Rrm1,Ccl2,Stil,Slfn1,Tert,Ttk,Ubd,Dbf4,Cdca8,Mad2l1,Gpr132,Mad2l1bp,Nuf2,Ndc80,Anp32b,Cdca5,Zwilch,Ube2c,Ctc1,Trip13,Spdl1,Dtl,Ticrr,Tex14,Gpnmb,Cdc20,Lsm10,Kntc1,Cdk5rap2,Cenpe,Zc3h12d,Ccnb1,Clspn,Kif14	58/341
GO Biological Processes	GO:0045787	Positive regulation of cell cycle	-9.77417	-7.03223	Apex1,Birc5,App,Bard1,Btc,Ccnd2,Cdc25a,Cdc25b,Cdk1,Cdc7,Chek1,Cyp1a1,Fen1,Smc2,Incenp,Kif3b,Myc,Prkca,Rad51ap1,Rad51b,Rrm1,Stil,Src,Plk4,Aurka,Tert,Tgfb2,Tnf,Asns,Dbf4,Cdca8,Spag5,Ncapg,Mad2l1,Nupr1,Psrc1,Smpd3,Mad2l1bp,Ndc80,Anp32b,Cdca5,Sgo2a,Ube2c,Kif23,Fam83d,Ncapg2,Dtl,Cdc20,Nusap1,E2f8,Lsm10,Ncaph,Dyrk3,Cenpe,Gdpd5,Plcg2,Kif20b,Ccnb1,Kif14	59/350
GO Biological Processes	GO:0007088	Regulation of mitotic nuclear division	-9.61653	-6.88983	Birc5,Btc,Bub1,Bub1b,Chek1,Incenp,Mki67,Plk1,Tnf,Ttk,Ywhah,Cdca8,Mad2l1,Smpd3,Cul7,Mad2l1bp,Nuf2,Ndc80,Zwilch,Ube2c,Trip13,Spdl1,Tex14,Cdc20,Nusap1,Cdca2,Kntc1,Cdk5rap2,Cenpe,Ccnb1	30/117
GO Biological Processes	GO:0033046	Negative regulation of sister chromatid segregation	-9.29742	-6.62684	Birc5,Bub1,Bub1b,Plk1,Ttk,Mad2l1,Mad2l1bp,Nuf2,Ndc80,Zwilch,Trip13,Spdl1,Tex14,Cdc20,Kntc1,Cenpe	16/36
GO Biological Processes	GO:0033048	Negative regulation of mitotic sister chromatid segregation	-9.29742	-6.62684	Birc5,Bub1,Bub1b,Plk1,Ttk,Mad2l1,Mad2l1bp,Nuf2,Ndc80,Zwilch,Trip13,Spdl1,Tex14,Cdc20,Kntc1,Cenpe	16/36
GO Biological Processes	GO:0045841	Negative regulation of mitotic metaphase/anaphase transition	-9.29742	-6.62684	Birc5,Bub1,Bub1b,Plk1,Ttk,Mad2l1,Mad2l1bp,Nuf2,Ndc80,Zwilch,Trip13,Spdl1,Tex14,Cdc20,Kntc1,Cenpe	16/36
GO Biological Processes	GO:2000816	Negative regulation of mitotic sister chromatid separation	-9.29742	-6.62684	Birc5,Bub1,Bub1b,Plk1,Ttk,Mad2l1,Mad2l1bp,Nuf2,Ndc80,Zwilch,Trip13,Spdl1,Tex14,Cdc20,Kntc1,Cenpe	16/36
GO Biological Processes	GO:1901987	Regulation of cell cycle phase transition	-9.13775	-6.48013	Actb,Apex1,Birc5,App,Bard1,Bub1,Bub1b,Ccnd2,Cdc25a,Cdc25b,Cdk1,Cdc7,Cdkn1a,Cdkn2b,Chek1,Cyp1a1,E2f1,Fem1b,Prmt2,Ier3,Incenp,Muc1,Plk1,Rad51,Rad51b,Rbl1,Rrm1,Ccl2,Stil,Slfn1,Aurka,Tert,Ttk,Ubd,Dbf4,Plpp2,Cdca8,Mad2l1,Gpr132,Mad2l1bp,Nuf2,Ndc80,Cdt1,Anp32b,Cdca5,Zwilch,Ube2c,Ctc1,Trip13,Spdl1,Fam83d,Dtl,Ticrr,Tex14,Gpnmb,Cdc20,Lsm10,Kntc1,Cdk5rap2,Dyrk3,Cenpe,Plcg2,Zc3h12d,Eme1,Ccnb1,Clspn,Kif14	67/438
GO Biological Processes	GO:0140013	Meiotic nuclear division	-8.87289	-6.25087	Birc5,Aspm,Ccnb2,Ccne1,Cdc25b,Cpeb1,Ddx4,Fanca,Smc2,Incenp,Lif,Tesmin,Mybl1,Plk1,Rad51,Aurka,Top2a,Ttk,Fignl1,Nuf2,Ndc80,Spire1,Sgo2a,Trip13,Cenps,Tdrd12,Sgo1,Ndc1,Hsf2bp,Mnd1,Tex14,Espl1,Ncaph,Cenpe,Spire2,Eme1,Rad54b	37/178
GO Biological Processes	GO:1902100	Negative regulation of metaphase/anaphase transition of cell cycle	-8.87177	-6.25087	Birc5,Bub1,Bub1b,Plk1,Ttk,Mad2l1,Mad2l1bp,Nuf2,Ndc80,Zwilch,Trip13,Spdl1,Tex14,Cdc20,Kntc1,Cenpe	16/38
GO Biological Processes	GO:1905819	Negative regulation of chromosome separation	-8.87177	-6.25087	Birc5,Bub1,Bub1b,Plk1,Ttk,Mad2l1,Mad2l1bp,Nuf2,Ndc80,Zwilch,Trip13,Spdl1,Tex14,Cdc20,Kntc1,Cenpe	16/38
GO Biological Processes	GO:0051310	Metaphase plate congression	-8.64114	-6.03183	Incenp,Kifc5b,Cdca8,Psrc1,Rrs1,Nuf2,Ndc80,Cdt1,Cdca5,Spdl1,Fam83d,Kif2c,Champ1,Kif22,Cenpe,Ccnb1,Map1s,Kif14,Snhg15,Kifc1	20/61
GO Biological Processes	GO:0051985	Negative regulation of chromosome segregation	-8.47825	-5.88022	Birc5,Bub1,Bub1b,Plk1,Ttk,Mad2l1,Mad2l1bp,Nuf2,Ndc80,Zwilch,Trip13,Spdl1,Tex14,Cdc20,Kntc1,Cenpe	16/40
GO Biological Processes	GO:0045839	Negative regulation of mitotic nuclear division	-8.34424	-5.7572	Birc5,Bub1,Bub1b,Chek1,Plk1,Ttk,Mad2l1,Mad2l1bp,Nuf2,Ndc80,Zwilch,Trip13,Spdl1,Tex14,Cdc20,Kntc1,Cenpe	17/46
GO Biological Processes	GO:0007080	Mitotic metaphase plate congression	-8.01716	-5.44085	Kifc5b,Cdca8,Psrc1,Rrs1,Nuf2,Ndc80,Cdt1,Cdca5,Spdl1,Kif2c,Champ1,Kif22,Cenpe,Ccnb1,Kif14,Snhg15,Kifc1	17/48
GO Biological Processes	GO:0051225	Spindle assembly	-7.9884	-5.43414	Birc5,Aspm,Ccnb2,Incenp,Kif11,Kif3b,Kifc5b,Nek2,Aurka,Tubb5,Cdca8,Sac3d1,Ndc80,Kif23,Tpx2,Haus8,Misp,Cdc20,Flna,Map9,Cenpe,Prc1,Snhg15,Kifc1	24/92
GO Biological Processes	GO:0006260	DNA replication	-7.98144	-5.43414	Bard1,Ccne1,Cdc45,Fen1,Lig1,Mcm3,Mcm2,Mcm4,Mcm5,Mcm6,Pold1,Pole,Pole2,Prim1,Rad51,Rrm1,Polk,Dbf4,Chaf1a,Cdt1,Pclaf,Cenps,Tonsl,Dtl,Ticrr,Polq,Gins3,Grwd1,Rfc4,Fam111a,Cdk9,Mms22l,Wdhd1,Rmi2,Eme1,Gins2	36/183
GO Biological Processes	GO:0051783	Regulation of nuclear division	-7.97978	-5.43414	Birc5,Btc,Bub1,Bub1b,Chek1,Incenp,Lif,Mki67,Plk1,Rad51ap1,Tnf,Ttk,Ywhah,Cdca8,Mad2l1,Smpd3,Cul7,Mad2l1bp,Nuf2,Ndc80,Zwilch,Ube2c,Trip13,Spdl1,Tex14,Cdc20,Nusap1,Cdca2,Kntc1,Cdk5rap2,Cenpe,Ccnb1	32/151
GO Biological Processes	GO:0051784	Negative regulation of nuclear division	-7.68739	-5.15151	Birc5,Bub1,Bub1b,Chek1,Lif,Plk1,Ttk,Mad2l1,Mad2l1bp,Nuf2,Ndc80,Zwilch,Trip13,Spdl1,Tex14,Cdc20,Kntc1,Cenpe	18/56
GO Biological Processes	GO:1903046	Meiotic cell cycle process	-7.56265	-5.03631	Birc5,Aspm,Ccnb2,Ccne1,Cdc25b,Cpeb1,Ddx4,Fanca,Smc2,Incenp,Lif,Tesmin,Mybl1,Plk1,Rad51,Aurka,Top2a,Ttk,Fignl1,Nuf2,Ndc80,Spire1,Sgo2a,Trip13,Cenps,Tdrd12,Sgo1,Ndc1,Hsf2bp,Mnd1,Tex14,Espl1,Ncaph,Cenpe,Spire2,Eme1,Rad54b	37/198
GO Biological Processes	GO:1901989	Positive regulation of cell cycle phase transition	-7.49175	-4.97475	Apex1,Birc5,App,Ccnd2,Cdc25a,Cdc25b,Cdk1,Cdc7,Cyp1a1,Rad51b,Rrm1,Stil,Aurka,Tert,Dbf4,Mad2l1bp,Anp32b,Cdca5,Ube2c,Fam83d,Dtl,Cdc20,Lsm10,Dyrk3,Cenpe,Plcg2,Ccnb1	27/119
GO Biological Processes	GO:0051303	Establishment of chromosome localization	-7.43863	-4.93213	Birc5,Incenp,Kifc5b,Cdca8,Psrc1,Rrs1,Nuf2,Ndc80,Cdt1,Cdca5,Spdl1,Fam83d,Kif2c,Champ1,Kif22,Cenpe,Ccnb1,Map1s,Kif14,Snhg15,Kifc1	21/77
GO Biological Processes	GO:0033045	Regulation of sister chromatid segregation	-7.42731	-4.93213	Actb,Birc5,Bub1,Bub1b,Cdk1,Incenp,Plk1,Tacc3,Ttk,Cdca8,Mad2l1,Mad2l1bp,Nuf2,Ndc80,Zwilch,Ube2c,Trip13,Spdl1,Tex14,Cdc20,Kntc1,Cdk5rap2,Rmi2,Cenpe,Ccnb1	25/105
GO Biological Processes	GO:1901991	Negative regulation of mitotic cell cycle phase transition	-7.42225	-4.93213	Birc5,Bard1,Bub1,Bub1b,Cdk1,Cdkn1a,Cdkn2b,Chek1,Prmt2,Ier3,Muc1,Plk1,Rbl1,Ccl2,Slfn1,Ttk,Mad2l1,Gpr132,Mad2l1bp,Nuf2,Ndc80,Zwilch,Trip13,Spdl1,Dtl,Ticrr,Tex14,Gpnmb,Cdc20,Kntc1,Cenpe,Zc3h12d,Clspn	33/167
GO Biological Processes	GO:0006261	DNA-templated DNA replication	-7.09497	-4.61344	Bard1,Ccne1,Cdc45,Lig1,Mcm3,Mcm2,Mcm4,Mcm5,Mcm6,Pold1,Pole,Pole2,Prim1,Rad51,Rrm1,Cdt1,Cenps,Tonsl,Polq,Gins3,Rfc4,Fam111a,Cdk9,Mms22l,Wdhd1,Eme1,Gins2	27/124
GO Biological Processes	GO:1901992	Positive regulation of mitotic cell cycle phase transition	-6.93947	-4.46638	Apex1,Birc5,App,Ccnd2,Cdc25a,Cdc25b,Cdk1,Cdc7,Cyp1a1,Rad51b,Rrm1,Stil,Tert,Dbf4,Mad2l1bp,Anp32b,Cdca5,Ube2c,Dtl,Cdc20,Lsm10,Cenpe,Ccnb1	23/96
GO Biological Processes	GO:0030071	Regulation of mitotic metaphase/anaphase transition	-6.92417	-4.45934	Actb,Birc5,Bub1,Bub1b,Incenp,Plk1,Ttk,Cdca8,Mad2l1,Mad2l1bp,Nuf2,Ndc80,Zwilch,Ube2c,Trip13,Spdl1,Tex14,Cdc20,Kntc1,Cdk5rap2,Cenpe,Ccnb1	22/89
GO Biological Processes	GO:0006974	DNA damage response	-6.90864	-4.45194	Apex1,Bard1,Bax,Bcl2a1b,Btg2,Cdk1,Cdc45,Cdc7,Cdkn1a,Chek1,E2f1,Fanca,Fen1,Smc2,Foxm1,H2ax,Ier3,Lig1,Mcm3,Mcm2,Mcm4,Mcm5,Mcm6,Muc1,Myc,Nfatc2,Uhrf1,Pak1,Plk1,Pold1,Pole,Pole2,Rad51,Rad51ap1,Rad51b,Rrm1,Sgk1,Tnf,Top2a,Ung,Zmat3,Mapk3,Exo1,Polk,Chaf1a,Phlda3,Fbxo6,Nupr1,Xrcc2,Pmaip1,Chchd6,Nsmce3,Cdca5,Pclaf,Aen,Ctc1,Pierce1,Trip13,Aunip,Cenps,Faap100,Esco2,Chchd4,Cdkn3,Tonsl,Ddias,Hsf2bp,Parpbp,Dtl…	89/730
GO Biological Processes	GO:0000281	Mitotic cytokinesis	-6.83447	-4.39173	Birc5,Rhoc,Cenpa,Incenp,Stmn1,Plk1,Kif20a,Rtkn,Exoc4,Unc119,Iqgap1,Cdca8,Cul7,Anln,Kif23,Cep55,Ckap2,Nusap1,Map9,Iqgap3	20/76
GO Biological Processes	GO:0050000	Chromosome localization	-6.82495	-4.39173	Birc5,Incenp,Kifc5b,Cdca8,Psrc1,Rrs1,Nuf2,Ndc80,Cdt1,Cdca5,Spdl1,Fam83d,Kif2c,Champ1,Kif22,Cenpe,Ccnb1,Map1s,Kif14,Snhg15,Kifc1	21/83
GO Biological Processes	GO:2001251	Negative regulation of chromosome organization	-6.82495	-4.39173	Birc5,Bub1,Bub1b,Mcm2,Plk1,Src,Top2a,Ttk,Mad2l1,Mad2l1bp,Nuf2,Ndc80,Zwilch,Ctc1,Trip13,Spdl1,Tex14,Cdc20,Pif1,Kntc1,Cenpe	21/83
GO Biological Processes	GO:0030036	Actin cytoskeleton organization	-6.77652	-4.35085	Actb,Actg1,Arf6,Capg,Casq1,Cdh1,Coro1a,Cldn3,Enah,Epb41l1,Fat1,Fgd1,Fhl3,Gas7,S1pr2,Krt8,Arhgef2,Limk1,Limk2,Myo1f,Myo7b,Nck1,Nck2,Nedd9,Pak1,Pdgfa,Tmsb10,Sirpa,Ran,Rtkn,S100a9,Src,Tagln2,Tnf,Tpm1,Tpm2,Dpysl3,Vill,Twf2,Ldb3,Plek2,Iqgap1,Arhgef5,Plek,Rhog,Diaph3,Sh3d21,Spire1,Anln,Rhou,Ptk7,Myh14,Rflna,Rflnb,Ophn1,Pls1,Rhoq,Abr,Pawr,Elmo1,Flna,Baiap2l2,Myo5c,Coro6,Pgm5,Ssh1,Spire2,Auts2,Iqgap3	69/522
GO Biological Processes	GO:0090307	Mitotic spindle assembly	-6.73742	-4.31917	Birc5,Incenp,Kif11,Kif3b,Kifc5b,Nek2,Cdca8,Kif23,Tpx2,Misp,Cdc20,Flna,Map9,Prc1,Snhg15,Kifc1	16/51
GO Biological Processes	GO:0000727	Double-strand break repair via break-induced replication	-6.69759	-4.28664	Cdc45,Cdc7,Mcm3,Mcm2,Mcm4,Mcm5,Mcm6,Gins2	8/12
GO Biological Processes	GO:1902099	Regulation of metaphase/anaphase transition of cell cycle	-6.65087	-4.24711	Actb,Birc5,Bub1,Bub1b,Incenp,Plk1,Ttk,Cdca8,Mad2l1,Mad2l1bp,Nuf2,Ndc80,Zwilch,Ube2c,Trip13,Spdl1,Tex14,Cdc20,Kntc1,Cdk5rap2,Cenpe,Ccnb1	22/92
GO Biological Processes	GO:0007093	Mitotic cell cycle checkpoint signaling	-6.57948	-4.18278	Birc5,Bard1,Bub1,Bub1b,Cdk1,Cdkn1a,Chek1,Ier3,Muc1,Plk1,Stil,Ttk,Mad2l1,Mad2l1bp,Nuf2,Ndc80,Zwilch,Trip13,Spdl1,Dtl,Ticrr,Tex14,Cdc20,Kntc1,Cenpe,Eme1,Clspn	27/131
GO Biological Processes	GO:0045930	Negative regulation of mitotic cell cycle	-6.55347	-4.16372	Birc5,Bard1,Btg2,Btg3,Bub1,Bub1b,Cdk1,Cdkn1a,Cdkn2b,Chek1,Prmt2,Ier3,Muc1,Plk1,Rbl1,Ccl2,Stil,Slfn1,Tnf,Ttk,Mad2l1,Gpr132,Mad2l1bp,Nuf2,Ndc80,Zwilch,Trip13,Spdl1,Dtl,Ticrr,Tex14,Gpnmb,Cdc20,Kntc1,Cenpe,Zc3h12d,Eme1,Clspn	38/225
GO Biological Processes	GO:0007143	Female meiotic nuclear division	-6.48276	-4.09985	Ccnb2,Cdc25b,Plk1,Aurka,Top2a,Ttk,Ndc80,Spire1,Sgo2a,Trip13,Hsf2bp,Ncaph,Cenpe,Spire2	14/41
GO Biological Processes	GO:0010948	Negative regulation of cell cycle process	-6.4512	-4.07501	Birc5,Bard1,Bub1,Bub1b,Cdk1,Cdkn1a,Cdkn2b,Chek1,E2f1,Prmt2,Ier3,Lif,Muc1,Nek2,Plk1,Rbl1,Ccl2,Stil,Slfn1,Ttk,Mad2l1,Gpr132,Mad2l1bp,Nuf2,Ndc80,Cdt1,Zwilch,Dab2ip,Trip13,Spdl1,Dtl,Ticrr,Tex14,Gpnmb,Cdc20,E2f8,Kntc1,Cdk5rap2,Cenpe,Zc3h12d,Eme1,Clspn,Kifc1	43/273
GO Biological Processes	GO:0000910	Cytokinesis	-6.39771	-4.02816	Birc5,Rhoc,Cenpa,Incenp,Stmn1,Plk1,Kif20a,Rtkn,Exoc4,Unc119,Iqgap1,Cdca8,Septin11,Cul7,Spire1,Anln,Kif23,Cep55,Ckap2,Nusap1,Map9,Prc1,Spire2,Iqgap3	24/110
GO Biological Processes	GO:0061640	Cytoskeleton-dependent cytokinesis	-6.34848	-3.98545	Birc5,Rhoc,Cenpa,Incenp,Stmn1,Plk1,Kif20a,Rtkn,Exoc4,Unc119,Iqgap1,Cdca8,Septin11,Cul7,Spire1,Anln,Kif23,Cep55,Ckap2,Nusap1,Map9,Spire2,Iqgap3	23/103
GO Biological Processes	GO:0051383	Kinetochore organization	-6.28013	-3.92354	Cenpa,Smc2,Cenph,Nuf2,Ndc80,Kntc1,Dlgap5,Cenpe,Cenpt	9/17
GO Biological Processes	GO:0071459	Protein localization to chromosome, centromeric region	-6.13103	-3.78078	Bub1b,Cdk1,Cenpa,Ttk,Zwilch,Spdl1,Knl1,Champ1,Kntc1,Snhg15	10/22
GO Biological Processes	GO:0033044	Regulation of chromosome organization	-6.03087	-3.68687	Actb,Birc5,Bub1,Bub1b,Cdk1,Fen1,Smc2,Incenp,Mcm2,Myc,Nek2,Plk1,Src,Tacc3,Top2a,Ttk,Mapk3,Cdca8,Ncapg,Mad2l1,Mad2l1bp,Nuf2,Ndc80,Zwilch,Sgo2a,Ube2c,Ctc1,Trip13,Spdl1,Tex14,Cdc20,Pif1,Kntc1,Cdk5rap2,Ncaph,Wdhd1,Rmi2,Cenpe,Ccnb1	39/245
GO Biological Processes	GO:2000147	Positive regulation of cell motility	-6.0215	-3.68366	Actg1,Adam8,Anxa3,App,Arf6,Rhoc,C3ar1,Coro1a,Cldn3,Cldn4,Cxcr4,Ccr2,Cpeb1,Cx3cr1,Defb1,Twist2,F2rl1,Hbegf,Ccn1,Itga3,Itga6,Itgax,Jun,Lamc2,Arhgef2,Lgals3,Epcam,Myc,Myo1f,Nedd9,Nfe2l2,Ntrk3,Pak1,Pdgfa,Prkca,Serpine1,S100a11,Ccl2,Ccl7,Cx3cl1,Sema3b,Sema4b,Sema4d,Sox9,Spn,Src,Tert,Tgfb2,Tgfbr2,Thbs1,Vegfc,Ccn4,Tlr2,Mapk3,Map4k4,Iqgap1,Stk39,Cldn7,Pdgfc,Clec7a,Dab2ip,Plet1,Trem2,Gpnmb,Fam110c,Mgat5,P…	76/622
GO Biological Processes	GO:1902969	Mitotic DNA replication	-5.96936	-3.64949	Cdc45,Lig1,Mcm3,Mcm2,Mcm4,Mcm6,Rad51,Gins3	8/14
GO Biological Processes	GO:0034501	Protein localization to kinetochore	-5.96936	-3.64949	Cdk1,Ttk,Zwilch,Spdl1,Knl1,Champ1,Kntc1,Snhg15	8/14
GO Biological Processes	GO:1903083	Protein localization to condensed chromosome	-5.96936	-3.64949	Cdk1,Ttk,Zwilch,Spdl1,Knl1,Champ1,Kntc1,Snhg15	8/14
GO Biological Processes	GO:1901988	Negative regulation of cell cycle phase transition	-5.96189	-3.64786	Birc5,Bard1,Bub1,Bub1b,Cdk1,Cdkn1a,Cdkn2b,Chek1,E2f1,Prmt2,Ier3,Muc1,Plk1,Rbl1,Ccl2,Stil,Slfn1,Ttk,Mad2l1,Gpr132,Mad2l1bp,Nuf2,Ndc80,Cdt1,Zwilch,Trip13,Spdl1,Dtl,Ticrr,Tex14,Gpnmb,Cdc20,Kntc1,Cenpe,Zc3h12d,Eme1,Clspn	37/228
GO Biological Processes	GO:0098609	Cell-cell adhesion	-5.93999	-3.6317	Adam8,Cd24a,Cd44,Cdh1,Cdh17,Cldn3,Ccr2,Cx3cr1,Dab1,Fat1,Ccn1,Itga3,Itga6,Itgal,Itgam,Itgax,Itgb2,Ajuba,Kifc3,Lama5,Lgals1,Epcam,Mmp24,Robo1,S100a9,Cx3cl1,Sema4d,Sox9,Serpinb8,Spn,Stk10,Tgfb2,Tgfbr2,Thbs1,Tjp2,Tnf,Vnn1,Tenm4,Slc7a11,Pvr,Plek,Pkp3,Clec7a,Igdcc4,Ttyh1,Tnip1,Myot,Tln2,Pcdh18,Rap2b,Fblim1,Igsf9,Rap1gap,Npnt,Bloc1s4,Igsf11,Nrg1,Dsg1c,Lrfn3,Cdsn	60/455
GO Biological Processes	GO:0006281	DNA repair	-5.934	-3.63139	Apex1,Bard1,Cdc45,Cdc7,Chek1,Fanca,Fen1,Smc2,Foxm1,H2ax,Lig1,Mcm3,Mcm2,Mcm4,Mcm5,Mcm6,Uhrf1,Pold1,Pole,Pole2,Rad51,Rad51ap1,Rad51b,Rrm1,Ung,Exo1,Polk,Chaf1a,Fbxo6,Xrcc2,Nsmce3,Cdca5,Pclaf,Trip13,Aunip,Cenps,Faap100,Esco2,Chchd4,Tonsl,Hsf2bp,Parpbp,Dtl,Ticrr,Polq,Rfc4,Fam111a,Cdk9,Kif22,Pif1,Mms22l,Hrob,Wdhd1,Rmi2,Alkbh2,Hmces,Palb2,Kdm4d,Eme1,Clspn,Gins2,Rad54b	62/476
GO Biological Processes	GO:1905820	Positive regulation of chromosome separation	-5.91527	-3.61827	Birc5,Smc2,Incenp,Cdca8,Ncapg,Mad2l1bp,Ube2c,Ncapg2,Cdc20,Ncaph,Cenpe	11/28
GO Biological Processes	GO:0030335	Positive regulation of cell migration	-5.87391	-3.58244	Actg1,Adam8,Anxa3,App,Arf6,Rhoc,C3ar1,Coro1a,Cldn3,Cldn4,Cxcr4,Ccr2,Cpeb1,Cx3cr1,Twist2,F2rl1,Hbegf,Ccn1,Itga3,Itga6,Itgax,Jun,Lamc2,Arhgef2,Lgals3,Myc,Myo1f,Nedd9,Nfe2l2,Ntrk3,Pak1,Pdgfa,Prkca,Serpine1,S100a11,Ccl2,Ccl7,Cx3cl1,Sema3b,Sema4b,Sema4d,Sox9,Spn,Src,Tert,Tgfb2,Tgfbr2,Thbs1,Vegfc,Ccn4,Tlr2,Mapk3,Map4k4,Iqgap1,Stk39,Pdgfc,Clec7a,Dab2ip,Plet1,Trem2,Gpnmb,Fam110c,Mgat5,Pawr,Flna,Ripor2,Ar…	73/595
GO Biological Processes	GO:0040017	Positive regulation of locomotion	-5.85905	-3.57304	Actg1,Adam8,Anxa3,App,Arf6,Rhoc,C3ar1,Coro1a,Cldn3,Cldn4,Cxcr4,Ccr2,Cpeb1,Cx3cr1,Defb1,Twist2,F2rl1,Hbegf,Ccn1,Itga3,Itga6,Itgax,Jun,Lamc2,Arhgef2,Lgals3,Epcam,Myc,Myo1f,Nedd9,Nfe2l2,Ntrk3,Pak1,Pdgfa,Prkca,Serpine1,S100a11,Ccl2,Ccl7,Cx3cl1,Sema3b,Sema4b,Sema4d,Sox9,Spn,Src,Stx3,Tert,Tgfb2,Tgfbr2,Thbs1,Vegfc,Ccn4,Tlr2,Mapk3,Map4k4,Iqgap1,Stk39,Cldn7,Pdgfc,Clec7a,Dab2ip,Plet1,Trem2,Gpnmb,Fam110c,Mg…	77/639
GO Biological Processes	GO:0000075	Cell cycle checkpoint signaling	-5.84813	-3.56751	Birc5,Bard1,Bub1,Bub1b,Cdk1,Cdkn1a,Chek1,E2f1,Ier3,Muc1,Plk1,Stil,Ttk,Mad2l1,Mad2l1bp,Nuf2,Ndc80,Cdt1,Zwilch,Trip13,Spdl1,Dtl,Ticrr,Tex14,Cdc20,Kntc1,Cenpe,Eme1,Clspn	29/159
GO Biological Processes	GO:0030029	Actin filament-based process	-5.83098	-3.55569	Actb,Actg1,Arf6,Capg,Casq1,Cdh1,Coro1a,Cldn3,Enah,Epb41l1,Fat1,Fgd1,Fhl3,Gas7,S1pr2,Krt8,Arhgef2,Limk1,Limk2,Myo1f,Myo7b,Nck1,Nck2,Nedd9,Pak1,Pdgfa,Tmsb10,Sirpa,Ran,Rtkn,S100a9,Src,Tagln2,Tnf,Tpm1,Tpm2,Dpysl3,Vill,Twf2,Ldb3,Plek2,Iqgap1,Arhgef5,Plek,Rhog,Diaph3,Kcne3,Sh3d21,Spire1,Anln,Rhou,Ptk7,Myh14,Rflna,Rflnb,Ophn1,Pls1,Rhoq,Epdr1,Abr,Pawr,Elmo1,Flna,Baiap2l2,Myo5c,Coro6,Pgm5,Ssh1,Spire2,Auts…	71/575
GO Biological Processes	GO:0045786	Negative regulation of cell cycle	-5.77034	-3.50032	Birc5,Bard1,Btg2,Btg3,Bub1,Bub1b,Cdk1,Cdkn1a,Cdkn2b,Chek1,E2f1,Nr4a1,Prmt2,Ier3,Lif,Muc1,Nek2,Plk1,Rbl1,Ccl2,Stil,Slfn1,Tnf,Ttk,Mad2l1,Nupr1,Gpr132,Mad2l1bp,Nuf2,Ndc80,Cdt1,Zwilch,Dab2ip,Trip13,Spdl1,Hexim2,Dtl,Ticrr,Tex14,Gpnmb,Tent5b,Cdc20,E2f8,Kntc1,Cdk5rap2,Cenpe,Zc3h12d,Eme1,Clspn,Kifc1	50/358
GO Biological Processes	GO:0051984	Positive regulation of chromosome segregation	-5.73621	-3.47139	Birc5,Cdk1,Smc2,Incenp,Cdca8,Ncapg,Mad2l1bp,Ncapg2,Ncaph,Cenpe,Ccnb1	11/29
GO Biological Processes	GO:0051231	Spindle elongation	-5.71066	-3.45098	Birc5,Incenp,Kif11,Kif4,Cdca8,Kif23,Prc1	7/11
GO Biological Processes	GO:1903036	Positive regulation of response to wounding	-5.69647	-3.44187	Actg1,Cd24a,Cd36,Cldn3,Cldn4,Cxcr4,Hbegf,Nfe2l2,Ntrk3,Serpine1,Plat,S100a9,Ccl2,Thbs1,Ccn4,Clec7a,Flna,Nrg1,Fermt1	19/81
GO Biological Processes	GO:0043408	Regulation of MAPK cascade	-5.67361	-3.42403	Adam8,App,Atf3,Cd24a,Cd36,Cd44,Cxcr4,Ccr2,Dag1,F2rl1,Foxm1,Lilrb4b,Lilrb4a,Ccn1,Il1rn,Ajuba,Jun,Mdfic,Lif,Ntrk3,Dusp8,Pak1,Pdgfa,Prkca,Pparg,Sirpa,Rasgrp1,Rgs2,Robo1,Ccl2,Ccl25,Ccl6,Ccl7,Cx3cl1,Smpd1,Sorl1,Src,Tgfb2,Thbs1,Tnf,Tnfrsf11a,Gdf15,Tlr2,Mapk3,Map4k4,Iqgap1,Stk39,Lpar2,Arhgef5,Pdgfc,Fgf21,Clcf1,Tnip1,Dusp10,Inava,Avpi1,Dab2ip,Gpr39,Map3k13,Fam83d,Psca,Marveld3,Irak3,Tnfrsf23,Cblc,Trem2,G…	86/746
GO Biological Processes	GO:1903555	Regulation of tumor necrosis factor superfamily cytokine production	-5.6482	-3.40359	Adam8,App,Cd14,Cd24a,Cd36,Ccr2,Cx3cr1,Twist2,Lilrb4b,Lilrb4a,Ifngr1,Ccn1,Arhgef2,Lpl,Ncl,Sirpa,Rasgrp1,Ccl2,Cx3cl1,Spn,Thbs1,Tlr2,Zbtb20,Clec7a,Irak3,Sash3,Trem2,Gpnmb,Spon2,Tmem106a,Plcg2,Oas3	32/189
GO Biological Processes	GO:0045785	Positive regulation of cell adhesion	-5.62658	-3.38687	Actb,Adam8,Zfhx3,Slc7a1,Cd24a,Cd36,Cd44,Cd63,Cd80,Cd83,Cdh1,Coro1a,Ccr2,Dag1,Lilrb4b,Lilrb4a,Adgrg1,Ccn1,Itga3,Itga6,Itgal,Itgb2,Lamb2,Lgals1,Lif,Nck1,Nck2,Nedd9,Prkca,Plaur,Sirpa,Rasgrp1,Ccl2,Ccl25,Cx3cl1,Sox4,Spn,Src,Stx3,Tgfb2,Tgfbr2,Tgm2,Thbs1,Tnf,Tpm1,Vnn1,Map4k4,Iqgap1,Apbb1ip,Dusp10,Sash3,Gimap3,Cd276,Rap1gap,Npnt,Pawr,Flna,Nrg1,Rell2,Pde4d,Fermt1,Vtcn1,Nfkbid,Kif26b,Mfsd2b	65/518
GO Biological Processes	GO:0044770	Cell cycle phase transition	-5.62139	-3.38653	Birc5,App,Bub1b,Ccna2,Ccnb2,Ccnd2,Ccne1,Cdc25a,Cdc25b,Cdk1,Cdc7,Chek1,E2f1,E2f3,Foxm1,Myc,Nes,Plk1,Pole,Tacc3,Gpr132,Ndc80,Anp32b,Ube2c,Rhou,Klf11,Ccnb1,Ccnjl,Iqgap3	29/163
GO Biological Processes	GO:0045087	Innate immune response	-5.59851	-3.36845	Actg1,App,Rab27a,Capg,Cd14,Cd24a,Coro1a,Cx3cr1,Defb1,Ear2,Wfdc18,F2rl1,Frk,Ifit2,Ifngr1,Ifngr2,Jchain,Il17ra,Arhgef2,Lgals3,Cd180,Ly86,Nck1,Nfkb2,Nqo1,Ppp1r14b,Sirpa,Rab20,Relb,S100a9,Ccl2,Ccl25,Ccl6,Ccl7,Cx3cl1,Sftpd,Slpi,Smpd1,Src,Tnf,Vnn1,Oasl2,Tlr2,Ubd,Rab11fip5,Tlr5,Mefv,Slc22a21,Raet1d,Rsad2,Zbp1,Slc15a3,Dus2,Trim13,Trim59,Polr3d,Inava,Chid1,Mcoln2,Dab2ip,Wfdc3,Endod1,Sting1,Tmem43,Stx11,N4…	85/738
GO Biological Processes	GO:0140694	Non-membrane-bounded organelle assembly	-5.59243	-3.36712	Actg1,Birc5,Aspm,Casq1,Ccnb2,Cenpa,Incenp,Kif11,Kif3b,Kifc5b,Krt8,Nek2,Plk4,Aurka,Tpm1,Tubb5,Ldb3,Cenph,Cdca8,Rrs1,Sac3d1,Ndc80,Kif23,Ddx28,Tpx2,Liat1,Haus8,Misp,Pls1,Cdc20,Nop2,Mrps2,Flna,Dhx37,Kntc1,Ythdf2,Map9,Cdk5rap2,Dlgap5,Pgm5,Cenpe,Prc1,Sh3pxd2b,Cenpt,Snhg15,Kifc1	46/323
GO Biological Processes	GO:0006268	DNA unwinding involved in DNA replication	-5.52359	-3.30298	Cdc45,Mcm3,Mcm2,Mcm4,Mcm5,Mcm6,Rad51,Gins3,Gins2	9/20
GO Biological Processes	GO:0008608	Attachment of spindle microtubules to kinetochore	-5.51091	-3.29494	Nuf2,Ndc80,Cdt1,Sgo1,Kif2c,Knl1,Tex14,Champ1,Cenpe,Snhg15	10/25
GO Biological Processes	GO:0045931	Positive regulation of mitotic cell cycle	-5.49705	-3.28567	Apex1,Birc5,App,Ccnd2,Cdc25a,Cdc25b,Cdk1,Cdc7,Cyp1a1,Prkca,Rad51b,Rrm1,Stil,Tert,Asns,Dbf4,Mad2l1bp,Anp32b,Cdca5,Ube2c,Dtl,Cdc20,Lsm10,Cenpe,Ccnb1	25/131
GO Biological Processes	GO:0045859	Regulation of protein kinase activity	-5.45176	-3.24493	Actb,Adam8,App,Areg,Btc,Ccna2,Ccnb2,Ccnd2,Ccne1,Cd24a,Cdc25b,Cdkn1a,Cdkn2b,Dab1,Dag1,Lilrb4b,Lilrb4a,Hbegf,Ccn1,Il1rn,Ajuba,Mas1,Nedd9,Neurl1a,Ntrk3,Pak1,Pdgfa,Prkca,Plk1,Pparg,Ptpro,Rasgrp1,Rgs2,Robo1,Stil,Smpd1,Sorl1,Src,Tgfb2,Thbs1,Tnf,Tnfrsf11a,Unc119,Vegfc,Vldlr,Iqgap1,Camk1,Dbndd2,Arhgef5,Pdgfc,Psrc1,Dusp10,Dab2ip,Hexim2,Gpr39,Map3k13,Tpx2,Camk2n2,Irak3,Rap2b,Mvp,Cblc,Nrg1,Cdk5rap2,Rassf2,T…	73/611
GO Biological Processes	GO:0051315	Attachment of mitotic spindle microtubules to kinetochore	-5.35738	-3.15505	Nuf2,Ndc80,Cdt1,Kif2c,Champ1,Cenpe,Snhg15	7/12
GO Biological Processes	GO:0032680	Regulation of tumor necrosis factor production	-5.3461	-3.14823	App,Cd14,Cd24a,Cd36,Ccr2,Cx3cr1,Twist2,Lilrb4b,Lilrb4a,Ifngr1,Ccn1,Arhgef2,Lpl,Ncl,Sirpa,Rasgrp1,Ccl2,Cx3cl1,Spn,Thbs1,Tlr2,Zbtb20,Clec7a,Irak3,Sash3,Trem2,Gpnmb,Spon2,Tmem106a,Plcg2,Oas3	31/186
GO Biological Processes	GO:0044772	Mitotic cell cycle phase transition	-5.32134	-3.13224	Birc5,App,Bub1b,Ccna2,Ccnb2,Ccnd2,Ccne1,Cdc25a,Cdc25b,Cdk1,Chek1,E2f1,E2f3,Foxm1,Myc,Nes,Plk1,Pole,Tacc3,Gpr132,Anp32b,Ube2c,Rhou,Klf11,Ccnb1,Ccnjl,Iqgap3	27/151
GO Biological Processes	GO:0051129	Negative regulation of cellular component organization	-5.29163	-3.11114	Slc25a4,Birc5,App,Arf6,Bub1,Bub1b,Capg,Cdh1,Chek1,Coro1a,Dab1,Ier3,Itga3,Stmn1,Arhgef2,Lgals1,Lgals3,Lif,Limk2,Mbp,Mcm2,Map1b,Plk1,Plxna3,Pparg,Tmsb10,Sirpa,Sema3b,Sema4b,Sema4d,Sftpd,Sgk1,Sorl1,Sox9,Src,Tnf,Top2a,Tpm1,Ttk,Dpysl3,Unc119,Vill,Ywhah,Twf2,Tlr2,Map4k4,Rhpn2,Cldn7,Mefv,Ubqln2,Mad2l1,Nupr1,Scamp5,Mad2l1bp,Nuf2,Ndc80,Zwilch,Ctc1,Trip13,Bag5,Spdl1,Spef1,Tpx2,Irak3,Ckap2,Trem2,Tex14,Cdc20…	87/774
GO Biological Processes	GO:0001934	Positive regulation of protein phosphorylation	-5.29163	-3.11114	Adam8,Birc5,App,Areg,Btc,Anxa2,Ccnd2,Cd24a,Cd36,Cd44,Cd80,Cdc25b,Cdkn1a,Cldn3,Cxcr4,Cx3cr1,Dab1,Dag1,S1pr2,Hbegf,Ccn1,Il1rn,Incenp,Inhbb,Ajuba,Arhgef2,Lif,Limk2,Mas1,Nedd9,Neurl1a,Ntrk3,Pak1,Pdgfa,Prkca,Plaur,Plk1,Pparg,Rasgrp1,Robo1,Cx3cl1,Sema4d,Stil,Sox9,Spn,Src,Tgfb2,Tgfbr2,Thbs1,Tnf,Tnfrsf11a,Unc119,Vegfc,Vldlr,Gdf15,Mapk3,Iqgap1,Camk1,Cdca8,Arhgef5,Pdgfc,Fgf21,Clcf1,Psrc1,Niban1,Dab2ip,Gpr3…	87/774
GO Biological Processes	GO:0090231	Regulation of spindle checkpoint	-5.10723	-2.93097	Birc5,Incenp,Aurka,Cdca8,Mad2l1,Mad2l1bp,Ndc80,Cdk5rap2,Ccnb1	9/22
GO Biological Processes	GO:0006259	DNA metabolic process	-5.05469	-2.88678	Apex1,Bard1,Ccne1,Cdc45,Cdc7,Chek1,Ddx4,Fanca,Fen1,Smc2,Foxm1,Hells,H2ax,Lig1,Lox,Mcm3,Mcm2,Mcm4,Mcm5,Mcm6,Uhrf1,Pold1,Pole,Pole2,Prim1,Rad51,Rad51ap1,Rad51b,Rrm1,Src,Tert,Top2a,Ung,Exo1,Polk,Dbf4,Chaf1a,Fbxo6,Nhp2,Xrcc2,Smpd3,Nsmce3,Cdt1,Cdca5,Pclaf,Gar1,Ctc1,Trip13,Aunip,Cenps,Faap100,Tdrd12,Esco2,Chchd4,Tonsl,Hsf2bp,Parpbp,Dtl,Mnd1,Ticrr,Polq,Gins3,Hmgb2,Grwd1,Rfc4,Fam111a,Cdk9,Kif22,Pif1,Mms2…	82/728
GO Biological Processes	GO:0030174	Regulation of DNA-templated DNA replication initiation	-5.04848	-2.88469	Mcm3,Mcm2,Mcm4,Mcm5,Mcm6,Cdt1,Ticrr	7/13
GO Biological Processes	GO:0007162	Negative regulation of cell adhesion	-5.01636	-2.85821	Adam8,Angpt2,Cd24a,Cd44,Cd80,Cd9,Cdh1,Dab1,Lilrb4b,Lilrb4a,Il1rn,Lgals1,Lgals3,Epcam,Mbp,Mmp12,Muc1,Myo1f,Serpine1,Plxna3,Ccl25,Sema4d,Sftpd,Slfn1,Spn,Src,Thbs1,Mapk7,Meltf,Cldn7,Socs6,Dlg5,Plet1,Gimap3,Gpnmb,Cd276,Pawr,Muc4,Ripor2,Il20rb,Zc3h12d,Vtcn1,Nfkbid,Cdsn	44/319
GO Biological Processes	GO:0051321	Meiotic cell cycle	-5.01388	-2.85821	Birc5,Aspm,Ccnb2,Ccne1,Cdc25b,Cpeb1,Ddx4,Fanca,Smc2,H2ax,Incenp,Lif,Mki67,Tesmin,Mybl1,Nek2,Plk1,Rad51,Rad51ap1,Aurka,Top2a,Ttk,Exo1,Xlr4b,Fignl1,Nuf2,Ndc80,Spire1,Sgo2a,Trip13,Cenps,Tdrd12,Sgo1,Ndc1,Hsf2bp,Mnd1,Tex14,Espl1,Ncaph,Cenpe,Spire2,Eme1,Rad54b	43/309
GO Biological Processes	GO:0034508	Centromere complex assembly	-4.91918	-2.77148	Cenpa,Cenph,Oip5,Cenpn,Cenpi,Kntc1,Dlgap5,Cenpe,Cenpt	9/23
GO Biological Processes	GO:0010639	Negative regulation of organelle organization	-4.8804	-2.73663	Slc25a4,Birc5,Bub1,Bub1b,Capg,Chek1,Coro1a,Ier3,Stmn1,Arhgef2,Lif,Limk2,Mcm2,Map1b,Plk1,Pparg,Tmsb10,Sgk1,Src,Top2a,Tpm1,Ttk,Vill,Twf2,Tlr2,Rhpn2,Mad2l1,Nupr1,Mad2l1bp,Nuf2,Ndc80,Zwilch,Ctc1,Trip13,Spdl1,Spef1,Tpx2,Ckap2,Tex14,Cdc20,Inpp5j,Pif1,Kntc1,Cdk5rap2,Cenpe,Ssh1,Tigar,Kifc1	48/364
GO Biological Processes	GO:0002831	Regulation of response to biotic stimulus	-4.82782	-2.68794	Adam8,App,Arf6,Cd14,Cd24a,Cd36,Evpl,F2rl1,Ivl,Cd180,Ly86,Mmp12,Myo1f,Nfe2l2,Prkca,Pparg,Rasgrp1,Cxcl5,Cx3cl1,Spn,Tnf,Plscr1,Tlr2,Mapk3,Pvr,Tlr5,Mefv,Clec7a,Tnip1,Rsad2,Zbp1,Dusp10,Slc15a3,Serpinb1a,Polr3d,Inava,Wdfy1,Dab2ip,Sting1,Irak3,Rftn1,N4bp1,Gimap3,Trem2,Trim6,Hmgb2,Smpdl3b,Muc4,Lacc1,Ythdf2,Ttll12,Rab7b,Oasl1,Plcg2,Gpatch3,Ifnlr1,Oas3,Nlrx1,Tigar,Ifi211,Isg15	61/504
GO Biological Processes	GO:0001819	Positive regulation of cytokine production	-4.82284	-2.68682	Adam8,App,C3ar1,Cd14,Cd36,Cd83,Chil3,Ccr2,F2rl1,Ifngr1,Ccn1,Il17ra,Arhgef2,Lpl,Ltb,Mbp,Mmp12,Ncl,Serpine1,Rasgrp1,Ccl2,Cx3cl1,Slc7a5,Sorl1,Spn,Src,Thbs1,Tnf,Tlr2,Tlr5,Mefv,Panx1,Zbtb20,Clec7a,Scamp5,Rsad2,Polr3d,Inava,Mcoln2,Sulf2,Sting1,Ankrd42,Irak3,Sash3,Rftn1,Gimap3,Trem2,Trim6,Hmgb2,Spon2,Cd276,Lacc1,Il20rb,Tmem106a,Afap1l2,Rab7b,Plcg2,Pde4d,Fermt1,Vtcn1,Oas3,Ifi211,Isg15	63/526
GO Biological Processes	GO:1903557	Positive regulation of tumor necrosis factor superfamily cytokine production	-4.80851	-2.67632	Adam8,App,Cd14,Cd36,Ccr2,Ifngr1,Ccn1,Arhgef2,Lpl,Ncl,Rasgrp1,Ccl2,Spn,Thbs1,Tlr2,Zbtb20,Clec7a,Sash3,Spon2,Tmem106a,Plcg2,Oas3	22/117
GO Biological Processes	GO:0007144	Female meiosis I	-4.77432	-2.64592	Ccnb2,Cdc25b,Aurka,Ndc80,Trip13,Hsf2bp,Cenpe	7/14
GO Biological Processes	GO:0006310	DNA recombination	-4.74844	-2.62538	Apex1,Bard1,Cdc45,Cdc7,H2ax,Lig1,Mcm3,Mcm2,Mcm4,Mcm5,Mcm6,Rad51,Rad51ap1,Rad51b,Top2a,Ung,Exo1,Xrcc2,Nsmce3,Trip13,Aunip,Cenps,Tonsl,Hsf2bp,Mnd1,Hmgb2,Pif1,Mms22l,Hrob,Rmi2,Palb2,Kdm4d,Eme1,Gins2,Rad54b	35/237
GO Biological Processes	GO:0043549	Regulation of kinase activity	-4.74553	-2.62538	Actb,Adam8,App,Areg,Btc,Ddr1,Ccna2,Ccnb2,Ccnd2,Ccne1,Cd24a,Cdc25b,Cdkn1a,Cdkn2b,Dab1,Dag1,Lilrb4b,Lilrb4a,Hbegf,Ccn1,Il1rn,Ajuba,Large1,Mas1,Nedd9,Neurl1a,Ntrk3,Pak1,Pdgfa,Prkca,Plk1,Pparg,Ptpro,Rasgrp1,Rbl1,Rgs2,Robo1,Stil,Smpd1,Sorl1,Src,Tgfb2,Thbs1,Tnf,Tnfrsf11a,Unc119,Vegfc,Vldlr,Iqgap1,Camk1,Dbndd2,Arhgef5,Pdgfc,Psrc1,Dusp10,Dab2ip,Hexim2,Gpr39,Map3k13,Tpx2,Camk2n2,Irak3,Rap2b,Mvp,Cblc,Trem2…	79/708
GO Biological Processes	GO:0033260	Nuclear DNA replication	-4.74259	-2.62538	Cdc45,Lig1,Mcm3,Mcm2,Mcm4,Mcm6,Rad51,Cdt1,Gins3	9/24
GO Biological Processes	GO:0032651	Regulation of interleukin-1 beta production	-4.70457	-2.59333	App,Cd36,Cx3cr1,S1pr3,F2rl1,Lilrb4b,Lilrb4a,Ccn1,Lpl,Sirpa,Tnf,Tlr2,Mefv,Panx1,Serpinb1a,Inava,Trem2,Ffar4,Tmem106a,Ifi211	20/102
GO Biological Processes	GO:0061041	Regulation of wound healing	-4.70324	-2.59333	Actg1,Anxa5,Anxa2,Cd36,Cd9,Cldn3,Cldn4,Cxcr4,F2rl1,Hbegf,Nfe2l2,Pdgfa,Serpine1,Plat,Plaur,S100a9,Ccl2,Thbs1,Tnf,Ccn4,Tnfrsf12a,Clec7a,Tspan8,Fermt1	24/136
GO Biological Processes	GO:0090329	Regulation of DNA-templated DNA replication	-4.69827	-2.59196	Cdc7,Mcm3,Mcm2,Mcm4,Mcm5,Mcm6,Dbf4,Cdt1,Ticrr,Gins3,Rfc4,E2f8,Gins2	13/49
GO Biological Processes	GO:0090303	Positive regulation of wound healing	-4.62247	-2.52328	Actg1,Cd36,Cldn3,Cldn4,Cxcr4,Hbegf,Nfe2l2,Serpine1,Plat,S100a9,Ccl2,Thbs1,Ccn4,Clec7a,Fermt1	15/64
GO Biological Processes	GO:0006270	DNA replication initiation	-4.57628	-2.48409	Ccne1,Cdc45,Mcm3,Mcm2,Mcm4,Mcm5,Mcm6,Prim1,Gins3	9/25
GO Biological Processes	GO:0044786	Cell cycle DNA replication	-4.57628	-2.48409	Cdc45,Lig1,Mcm3,Mcm2,Mcm4,Mcm6,Rad51,Cdt1,Gins3	9/25
GO Biological Processes	GO:0045132	Meiotic chromosome segregation	-4.51283	-2.43509	Aspm,Ccnb2,Ccne1,Cpeb1,Smc2,Plk1,Aurka,Top2a,Ttk,Nuf2,Ndc80,Trip13,Cenps,Sgo1,Ndc1,Mnd1,Espl1,Ncaph,Cenpe,Eme1	20/105
GO Biological Processes	GO:0051988	Regulation of attachment of spindle microtubules to kinetochore	-4.51025	-2.43509	Birc5,Incenp,Nek2,Knstrn,Cdca8,Spag5,Cenpe,Ccnb1	8/20
GO Biological Processes	GO:0090266	Regulation of mitotic cell cycle spindle assembly checkpoint	-4.51025	-2.43509	Birc5,Incenp,Cdca8,Mad2l1,Mad2l1bp,Ndc80,Cdk5rap2,Ccnb1	8/20
GO Biological Processes	GO:1903504	Regulation of mitotic spindle checkpoint	-4.51025	-2.43509	Birc5,Incenp,Cdca8,Mad2l1,Mad2l1bp,Ndc80,Cdk5rap2,Ccnb1	8/20
GO Biological Processes	GO:0000725	Recombinational repair	-4.47937	-2.40754	Cdc45,Cdc7,H2ax,Mcm3,Mcm2,Mcm4,Mcm5,Mcm6,Rad51,Rad51ap1,Rad51b,Xrcc2,Aunip,Tonsl,Mms22l,Hrob,Rmi2,Palb2,Kdm4d,Gins2,Rad54b	21/114
GO Biological Processes	GO:0032760	Positive regulation of tumor necrosis factor production	-4.42068	-2.35544	App,Cd14,Cd36,Ccr2,Ifngr1,Ccn1,Arhgef2,Lpl,Ncl,Rasgrp1,Ccl2,Spn,Thbs1,Tlr2,Zbtb20,Clec7a,Sash3,Spon2,Tmem106a,Plcg2,Oas3	21/115
GO Biological Processes	GO:0007015	Actin filament organization	-4.36366	-2.3049	Capg,Coro1a,Enah,Fat1,Gas7,Arhgef2,Limk1,Myo1f,Myo7b,Nck1,Nck2,Nedd9,Sirpa,Src,Tagln2,Tpm1,Tpm2,Dpysl3,Vill,Twf2,Iqgap1,Rhog,Diaph3,Sh3d21,Spire1,Rflna,Rflnb,Pls1,Pawr,Elmo1,Flna,Baiap2l2,Myo5c,Coro6,Spire2,Iqgap3	36/257
GO Biological Processes	GO:1903034	Regulation of response to wounding	-4.28625	-2.24016	Actg1,Anxa5,Anxa2,Cd24a,Cd36,Cd9,Cldn3,Cldn4,Cxcr4,F2rl1,Hbegf,Nfe2l2,Ntrk3,Pdgfa,Serpine1,Plat,Plaur,S100a9,Ccl2,Thbs1,Tnf,Ccn4,Tnfrsf12a,Clec7a,Flna,Nrg1,Tspan8,Fermt1	28/181
GO Biological Processes	GO:0051347	Positive regulation of transferase activity	-4.25091	-2.21103	Adam8,App,Areg,Btc,Ddr1,Ccnd2,Cd24a,Cdc25b,Cdkn1a,Dab1,Dag1,Hbegf,Ccn1,Il1rn,Ajuba,Mas1,Myc,Nedd9,Nek2,Neurl1a,Ntrk3,Pak1,Pdgfa,Plk1,Rasgrp1,Robo1,Stil,Sorl1,Src,Tgfb2,Thbs1,Tnf,Tnfrsf11a,Unc119,Vegfc,Vldlr,Mapk3,Iqgap1,Camk1,Arhgef5,Pdgfc,Psrc1,Dab2ip,Gpr39,Map3k13,Tpx2,Gins3,Trem2,Rfc4,Cdc20,Nrg1,Rassf2,Trib3,Cenpe,Serinc2,Parm1,Ccnb1,Clspn,Gins2,Tigar,Kif14	61/527
GO Biological Processes	GO:0022407	Regulation of cell-cell adhesion	-4.24557	-2.20876	Actb,Adam8,Slc7a1,Cd24a,Cd44,Cd80,Cd83,Cd9,Cdh1,Coro1a,Ccr2,Lilrb4b,Lilrb4a,Il1rn,Itga6,Itgal,Itgb2,Lgals1,Lgals3,Epcam,Mbp,Nck1,Nck2,Prkca,Plaur,Sirpa,Rasgrp1,Ccl2,Ccl25,Cx3cl1,Sftpd,Slfn1,Sox4,Spn,Src,Tgfbr2,Tnf,Vnn1,Mapk7,Socs6,Dusp10,Dlg5,Sash3,Gimap3,Gpnmb,Cd276,Rap1gap,Pawr,Muc4,Ripor2,Il20rb,Lrfn3,Zc3h12d,Pde4d,Vtcn1,Nfkbid,Kif26b,Cdsn,Mfsd2b	59/505
GO Biological Processes	GO:0000724	Double-strand break repair via homologous recombination	-4.21214	-2.17838	Cdc45,Cdc7,H2ax,Mcm3,Mcm2,Mcm4,Mcm5,Mcm6,Rad51,Rad51ap1,Rad51b,Xrcc2,Aunip,Tonsl,Mms22l,Rmi2,Palb2,Kdm4d,Gins2,Rad54b	20/110
GO Biological Processes	GO:0051656	Establishment of organelle localization	-4.18664	-2.15891	Birc5,Rab27a,Cenpa,F8a,Incenp,Kif5c,Kifc5b,Arhgef2,Limk2,Map1b,Myo1f,Myo7b,Plk1,Ran,Rasgrp1,Exoc4,Tacc3,Cdca8,Spag5,Mad2l1,Dynll1,Psrc1,Rrs1,Nuf2,Ndc80,Cdt1,Cdca5,Spire1,Spdl1,Fam83d,Sapcd2,Pard3b,Kif2c,Tanc2,Misp,Champ1,Nusap1,Kif22,Bloc1s4,Myo5c,Cdk5rap2,Cenpe,Spire2,Ccnb1,Map1s,Trim46,Kif14,Snhg15,Kifc1	49/398
GO Biological Processes	GO:0000022	Mitotic spindle elongation	-4.12837	-2.11536	Birc5,Incenp,Cdca8,Kif23,Prc1	5/8
GO Biological Processes	GO:0051256	Mitotic spindle midzone assembly	-4.12837	-2.11536	Birc5,Incenp,Cdca8,Kif23,Prc1	5/8
GO Biological Processes	GO:1901976	Regulation of cell cycle checkpoint	-4.10511	-2.10635	Birc5,Bard1,Fem1b,Incenp,Rad51,Aurka,Cdca8,Mad2l1,Mad2l1bp,Ndc80,Cdk5rap2,Ccnb1	12/48
GO Biological Processes	GO:0045860	Positive regulation of protein kinase activity	-4.09821	-2.10224	Adam8,App,Areg,Btc,Ccnd2,Cd24a,Cdc25b,Cdkn1a,Dab1,Dag1,Hbegf,Ccn1,Il1rn,Ajuba,Mas1,Nedd9,Neurl1a,Ntrk3,Pak1,Pdgfa,Rasgrp1,Robo1,Stil,Src,Tgfb2,Thbs1,Tnf,Tnfrsf11a,Unc119,Vegfc,Vldlr,Iqgap1,Camk1,Arhgef5,Pdgfc,Psrc1,Dab2ip,Gpr39,Map3k13,Tpx2,Nrg1,Rassf2,Cenpe,Ccnb1,Clspn,Kif14	46/369
GO Biological Processes	GO:0051302	Regulation of cell division	-4.04958	-2.05914	Birc5,Btc,Aspm,Cdc25b,Incenp,Kif3b,Myc,Pdgfa,Plk1,Kif20a,Aurka,Tgfb2,Vegfc,Zbtb18,Cdca8,Pdgfc,Kdf1,Mllt3,Kif23,Tex14,E2f8,Map9,Evi2b,Smyd5,Prc1,Kif20b,Kif14	27/177
GO Biological Processes	GO:0001775	Cell activation	-4.04633	-2.05863	Chrnb2,Anxa3,App,Rab27a,Bax,Cd24a,Entpd2,Cd44,Cd80,Cd83,Cdh17,Coro1a,Cxcr4,Ctsl,Cx3cr1,F2rl1,Fzd6,Fzd9,Gna13,Lilrb4b,Lilrb4a,Hells,Ifngr1,Ifngr2,Igkc,Il17ra,Itgal,Itgam,Itgb2,Jun,Lgals1,Blnk,Ly6d,Cd180,Myc,Myo1f,Nck1,Nck2,Ndrg1,Nfkb2,Plat,Rasgrp1,Relb,Cx3cl1,Slfn1,Sox4,Spn,Tgfbr2,Timp1,Tnf,Tpst2,Ung,Impdh1,Tlr2,Ubd,Slc7a11,Exo1,Ctps,Stk39,Apbb1ip,Plek,Clcf1,Rsad2,Hs1bp3,Rap2b,Sash3,Stx11,Gimap3,T…	83/789
GO Biological Processes	GO:0032652	Regulation of interleukin-1 production	-4.03225	-2.05251	App,Cd36,Cx3cr1,S1pr3,F2rl1,Lilrb4b,Lilrb4a,Ccn1,Lpl,Sirpa,Cx3cl1,Tnf,Tlr2,Mefv,Panx1,Serpinb1a,Inava,Trem2,Ffar4,Tmem106a,Ifi211	21/122
GO Biological Processes	GO:0051640	Organelle localization	-3.99532	-2.02106	Birc5,Rab27a,Aspm,Cenpa,Dab1,F8a,Incenp,Kif5c,Kifc5b,Arhgef2,Limk2,Bhlha15,Map1b,Myo1f,Myo7b,Plk1,Ran,Rasgrp1,Exoc4,Stx3,Syn1,Tacc3,Cdca8,Spag5,Mad2l1,Plek,Dynll1,Psrc1,Rrs1,Nuf2,Ndc80,Cdt1,Cdca5,Spire1,Rab3b,Spdl1,Fam83d,Sapcd2,Pard3b,Kif2c,Stx11,Tanc2,Misp,Champ1,Cdk9,Nusap1,Kif22,Bloc1s4,Mlph,Myo5c,Cdk5rap2,Vps18,Msto1,Cenpe,Spire2,Ccnb1,Map1s,Trim46,Kif14,Snhg15,Kifc1	61/538
GO Biological Processes	GO:0007057	Spindle assembly involved in female meiosis I	-3.96474	-2.00609	Ccnb2,Aurka,Ndc80,Cenpe	4/5
GO Biological Processes	GO:1902292	Cell cycle DNA replication initiation	-3.96474	-2.00609	Mcm3,Mcm2,Mcm4,Gins3	4/5
GO Biological Processes	GO:1902315	Nuclear cell cycle DNA replication initiation	-3.96474	-2.00609	Mcm3,Mcm2,Mcm4,Gins3	4/5
GO Biological Processes	GO:1902975	Mitotic DNA replication initiation	-3.96474	-2.00609	Mcm3,Mcm2,Mcm4,Gins3	4/5
GO Biological Processes	GO:0042130	Negative regulation of T cell proliferation	-3.9254	-1.97685	Cd24a,Cd44,Cd80,Lilrb4b,Lilrb4a,Sftpd,Slfn1,Spn,Dlg5,Gpnmb,Cd276,Pawr,Ripor2,Il20rb,Zc3h12d,Vtcn1	16/81
GO Biological Processes	GO:0032103	Positive regulation of response to external stimulus	-3.92018	-1.97412	Adam8,App,C3ar1,Cd14,Cd24a,Cxcr4,Ccr2,Ctss,Cx3cr1,F2rl1,Il17ra,Lgals1,Lpl,Cd180,Ly86,Mmp12,Nedd9,Ntrk3,Prkca,Serpine1,Plat,Rasgrp1,S100a9,Ccl2,Ccl7,Cx3cl1,Stx3,Tgm2,Thbs1,Tnf,Tnfrsf11a,Plscr1,Vegfc,Ccn4,Tlr2,Mapk3,Pvr,Stk39,Tlr5,Mefv,Nupr1,Clec7a,Tnip1,Rsad2,Zbp1,Slc15a3,Polr3d,Inava,Wdfy1,Sting1,Rftn1,Gimap3,Trem2,Trim6,Hmgb2,Flna,Ripor2,Lacc1,Nrg1,Oasl1,Plcg2,Oas3,Ifi211	63/564
GO Biological Processes	GO:1901970	Positive regulation of mitotic sister chromatid separation	-3.91429	-1.97317	Birc5,Incenp,Cdca8,Mad2l1bp,Ube2c,Cdc20,Cenpe	7/18
GO Biological Processes	GO:0051382	Kinetochore assembly	-3.91032	-1.97165	Cenpa,Cenph,Kntc1,Dlgap5,Cenpe,Cenpt	6/13
GO Biological Processes	GO:0070372	Regulation of ERK1 and ERK2 cascade	-3.87995	-1.94613	App,Atf3,Cd36,Cd44,Cxcr4,F2rl1,Ccn1,Jun,Lif,Pdgfa,Prkca,Sirpa,Rasgrp1,Ccl2,Ccl25,Ccl6,Ccl7,Cx3cl1,Src,Tnfrsf11a,Tlr2,Mapk3,Pdgfc,Fgf21,Clcf1,Tnip1,Dusp10,Dab2ip,Fam83d,Psca,Trem2,Gpnmb,Ffar4,Npnt,Nrg1,Dnajc27,Gpr55,Chrna9,Dusp4,Gpr183,E130311K13Rik,Glipr2	42/334
GO Biological Processes	GO:0022408	Negative regulation of cell-cell adhesion	-3.82121	-1.89316	Adam8,Cd24a,Cd44,Cd80,Cd9,Cdh1,Lilrb4b,Lilrb4a,Il1rn,Lgals3,Epcam,Mbp,Ccl25,Sftpd,Slfn1,Spn,Mapk7,Socs6,Dlg5,Gimap3,Gpnmb,Cd276,Pawr,Muc4,Ripor2,Il20rb,Zc3h12d,Vtcn1,Nfkbid,Cdsn	30/212
GO Biological Processes	GO:1902412	Regulation of mitotic cytokinesis	-3.80179	-1.87751	Birc5,Incenp,Cdca8,Map9,Kif20b	5/9
GO Biological Processes	GO:0050818	Regulation of coagulation	-3.77993	-1.858	Anxa5,Anxa2,Cd36,Cd9,F2rl1,Nfe2l2,Pdgfa,Serpine1,Plat,Plaur,Procr,S100a9,Thbd,Thbs1,Tspan8	15/75
GO Biological Processes	GO:0071900	Regulation of protein serine/threonine kinase activity	-3.75827	-1.84101	Actb,Adam8,App,Ccna2,Ccnb2,Ccnd2,Ccne1,Cd24a,Cdkn1a,Cdkn2b,Il1rn,Ajuba,Ntrk3,Pak1,Pdgfa,Plk1,Pparg,Rasgrp1,Rgs2,Robo1,Stil,Smpd1,Sorl1,Src,Thbs1,Tnf,Tnfrsf11a,Iqgap1,Camk1,Arhgef5,Pdgfc,Psrc1,Dusp10,Dab2ip,Hexim2,Gpr39,Map3k13,Irak3,Cblc,Cdk5rap2,Trib3,Ccnb1,Ccnjl	43/349
GO Biological Processes	GO:0030865	Cortical cytoskeleton organization	-3.7455	-1.83056	Arf6,Epb41l1,Rtkn,Tnf,Iqgap1,Plek,Rhog,Anln,Pls1,Synpo,Rhoq,Iqgap3	12/52
GO Biological Processes	GO:0045088	Regulation of innate immune response	-3.74048	-1.83013	Adam8,App,Arf6,Cd14,Cd36,F2rl1,Mmp12,Myo1f,Nfe2l2,Pparg,Rasgrp1,Tnf,Plscr1,Tlr2,Pvr,Tlr5,Mefv,Clec7a,Tnip1,Rsad2,Zbp1,Dusp10,Slc15a3,Serpinb1a,Polr3d,Inava,Wdfy1,Dab2ip,Sting1,Irak3,Rftn1,N4bp1,Gimap3,Trem2,Trim6,Hmgb2,Smpdl3b,Lacc1,Ythdf2,Ttll12,Rab7b,Oasl1,Plcg2,Gpatch3,Oas3,Nlrx1,Ifi211,Isg15	48/404
GO Biological Processes	GO:0007127	Meiosis I	-3.72787	-1.82208	Birc5,Ccnb2,Ccne1,Cdc25b,Cpeb1,Ddx4,Mybl1,Plk1,Rad51,Aurka,Top2a,Ndc80,Trip13,Cenps,Ndc1,Hsf2bp,Mnd1,Espl1,Cenpe,Eme1,Rad54b	21/128
GO Biological Processes	GO:0061982	Meiosis I cell cycle process	-3.72787	-1.82208	Birc5,Ccnb2,Ccne1,Cdc25b,Cpeb1,Ddx4,Mybl1,Plk1,Rad51,Aurka,Top2a,Ndc80,Trip13,Cenps,Ndc1,Hsf2bp,Mnd1,Espl1,Cenpe,Eme1,Rad54b	21/128
GO Biological Processes	GO:0006954	Inflammatory response	-3.68781	-1.78875	Adam8,App,C3ar1,Cd14,Cd24a,Cd44,Cd68,Chil3,Ccr2,Cx3cr1,S1pr3,Elf3,F2rl1,Lilrb4a,Ifngr1,Ifngr2,Il17ra,Il1rn,Itgam,Itgb2,Jun,Large1,Cd180,Ly86,Nfe2l2,Nfkb2,Pparg,Rasgrp1,Relb,S100a9,Ccl2,Ccl25,Ccl6,Ccl7,Cxcl5,Cx3cl1,Thbs1,Timp1,Tnf,Plscr1,Vnn1,Tlr2,Macir,Stk39,Tlr5,Ccrl2,Mefv,Nupr1,Tnip1,Serpinb1a,Dab2ip,Prcp,Trem2,Hmgb2,Smpdl3b,Ffar4,Hps1,Lacc1,Il20rb,Afap1l2,Nfkbid	61/552
GO Biological Processes	GO:0006302	Double-strand break repair	-3.56627	-1.68037	Cdc45,Cdc7,H2ax,Lig1,Mcm3,Mcm2,Mcm4,Mcm5,Mcm6,Rad51,Rad51ap1,Rad51b,Xrcc2,Cdca5,Trip13,Aunip,Esco2,Tonsl,Hsf2bp,Polq,Mms22l,Rmi2,Hmces,Palb2,Kdm4d,Eme1,Gins2,Rad54b	28/199
GO Biological Processes	GO:0090306	Meiotic spindle assembly	-3.52632	-1.6532	Aspm,Ccnb2,Aurka,Ndc80,Cenpe	5/10
GO Biological Processes	GO:0051255	Spindle midzone assembly	-3.52632	-1.6532	Birc5,Incenp,Cdca8,Kif23,Prc1	5/10
GO Biological Processes	GO:0043410	Positive regulation of MAPK cascade	-3.52137	-1.65033	Adam8,App,Cd24a,Cd36,Cd44,Cxcr4,Ccr2,F2rl1,Il1rn,Ajuba,Jun,Lif,Ntrk3,Pak1,Pdgfa,Prkca,Rasgrp1,Robo1,Ccl2,Ccl25,Ccl6,Ccl7,Cx3cl1,Src,Tgfb2,Thbs1,Tnf,Tnfrsf11a,Gdf15,Tlr2,Mapk3,Map4k4,Iqgap1,Stk39,Lpar2,Arhgef5,Pdgfc,Fgf21,Inava,Avpi1,Dab2ip,Gpr39,Map3k13,Trem2,Gpnmb,Ffar4,Npnt,Dok4,Nrg1,Rassf2,Tmem106a,Dnajc27,Rell2,Gpr55,Plcg2,Eda2r,Gpr183,Glipr2,Iqgap3	59/537
GO Biological Processes	GO:0007056	Spindle assembly involved in female meiosis	-3.51226	-1.6495	Ccnb2,Aurka,Ndc80,Cenpe	4/6
GO Biological Processes	GO:0032675	Regulation of interleukin-6 production	-3.50405	-1.64334	App,Cd24a,Cd36,F2rl1,Lilrb4b,Lilrb4a,Ccn1,Il17ra,Arhgef2,Lpl,Mbp,Ncl,Sirpa,Tnf,Tlr2,Zbtb20,Inava,Irak3,Trem2,Spon2,Tmem106a,Afap1l2,Rab7b,Plcg2,Nlrx1	25/171
GO Biological Processes	GO:0034502	Protein localization to chromosome	-3.49004	-1.63339	Bub1b,Cdk1,Cenpa,Plk1,Tert,Ttk,Zwilch,Spdl1,Esco2,Tonsl,Knl1,Champ1,Scml2,Kntc1,Mms22l,Snhg15	16/88
GO Biological Processes	GO:0043405	Regulation of MAP kinase activity	-3.45798	-1.61327	Adam8,App,Cd24a,Il1rn,Ajuba,Ntrk3,Pak1,Pdgfa,Pparg,Rasgrp1,Rgs2,Robo1,Smpd1,Sorl1,Src,Thbs1,Tnf,Tnfrsf11a,Iqgap1,Arhgef5,Pdgfc,Dusp10,Dab2ip,Gpr39,Map3k13,Irak3,Cblc,Trib3	28/202
GO Biological Processes	GO:0030866	Cortical actin cytoskeleton organization	-3.41873	-1.58181	Arf6,Epb41l1,Rtkn,Tnf,Iqgap1,Plek,Anln,Pls1,Rhoq,Iqgap3	10/41
GO Biological Processes	GO:0002718	Regulation of cytokine production involved in immune response	-3.2943	-1.47628	Cd36,Ccr2,Twist2,F2rl1,Lilrb4b,Lilrb4a,Tgfb2,Tnf,Tlr2,Panx1,Rsad2,Inava,Irak3,Sash3,Gimap3,Trim6,Spon2,Lacc1,Plcg2,Nlrx1	20/128
GO Biological Processes	GO:0050727	Regulation of inflammatory response	-3.27234	-1.46164	Adam8,App,Cd24a,Cd44,Ccr2,Ctss,Cx3cr1,Fanca,Gpx2,Ier3,Il17ra,Lgals1,Lpl,Mas1,Prkca,Serpine1,Pparg,Sirpa,S100a9,Cx3cl1,Spn,Tgm2,Tnf,Tnfrsf11a,Ccn4,Tlr2,Macir,Stk39,Mefv,Nupr1,Clcf1,Tnip1,Zbp1,Dusp10,C1qtnf12,Sting1,Trem2,Smpdl3b,Cd276,Ffar4,Abr,Lacc1,Il20rb,Trim45,Plcg2,Nlrx1	46/401
GO Biological Processes	GO:0033674	Positive regulation of kinase activity	-3.26596	-1.46025	Adam8,App,Areg,Btc,Ddr1,Ccnd2,Cd24a,Cdc25b,Cdkn1a,Dab1,Dag1,Hbegf,Ccn1,Il1rn,Ajuba,Mas1,Nedd9,Neurl1a,Ntrk3,Pak1,Pdgfa,Rasgrp1,Robo1,Stil,Src,Tgfb2,Thbs1,Tnf,Tnfrsf11a,Unc119,Vegfc,Vldlr,Iqgap1,Camk1,Arhgef5,Pdgfc,Psrc1,Dab2ip,Gpr39,Map3k13,Tpx2,Trem2,Nrg1,Rassf2,Cenpe,Ccnb1,Clspn,Tigar,Kif14	49/435
GO Biological Processes	GO:0042098	T cell proliferation	-3.26223	-1.45874	Bax,Cd24a,Coro1a,Cxcr4,Lilrb4a,Itgal,Itgam,Itgb2,Myc,Rasgrp1,Slfn1,Spn,Ctps,Sash3,Cd276,Il20rb,Zc3h12d	17/101
GO Biological Processes	GO:1903490	Positive regulation of mitotic cytokinesis	-3.16886	-1.38186	Birc5,Incenp,Cdca8,Kif20b	4/7
GO Biological Processes	GO:0032465	Regulation of cytokinesis	-3.16594	-1.38167	Birc5,Cdc25b,Incenp,Kif3b,Plk1,Kif20a,Aurka,Cdca8,Kif23,Tex14,E2f8,Map9,Prc1,Kif20b,Kif14	15/85
GO Biological Processes	GO:0050729	Positive regulation of inflammatory response	-3.13548	-1.35462	Adam8,App,Cd24a,Ccr2,Ctss,Il17ra,Lgals1,Lpl,Prkca,Serpine1,S100a9,Tgm2,Tnf,Tnfrsf11a,Ccn4,Tlr2,Mefv,Nupr1,Tnip1,Zbp1,Trem2,Plcg2	22/151
GO Biological Processes	GO:0043406	Positive regulation of MAP kinase activity	-3.11988	-1.35239	Adam8,App,Cd24a,Il1rn,Ajuba,Ntrk3,Pak1,Pdgfa,Rasgrp1,Robo1,Src,Thbs1,Tnf,Tnfrsf11a,Iqgap1,Arhgef5,Pdgfc,Dab2ip,Gpr39,Map3k13	20/132
GO Biological Processes	GO:1903038	Negative regulation of leukocyte cell-cell adhesion	-3.09632	-1.33047	Adam8,Cd24a,Cd44,Cd80,Lilrb4b,Lilrb4a,Lgals3,Ccl25,Sftpd,Slfn1,Spn,Socs6,Dlg5,Gimap3,Gpnmb,Cd276,Pawr,Ripor2,Il20rb,Zc3h12d,Vtcn1,Nfkbid	22/152
GO Biological Processes	GO:0022409	Positive regulation of cell-cell adhesion	-3.08488	-1.32229	Actb,Adam8,Slc7a1,Cd24a,Cd44,Cd80,Cd83,Cdh1,Coro1a,Ccr2,Lilrb4b,Lilrb4a,Itga6,Itgal,Itgb2,Lgals1,Nck1,Nck2,Plaur,Sirpa,Rasgrp1,Ccl2,Cx3cl1,Sox4,Spn,Tgfbr2,Tnf,Vnn1,Dusp10,Sash3,Gimap3,Cd276,Rap1gap,Pawr,Pde4d,Vtcn1,Nfkbid,Kif26b,Mfsd2b	39/331
GO Biological Processes	GO:0051987	Positive regulation of attachment of spindle microtubules to kinetochore	-3.07998	-1.32224	Birc5,Incenp,Cdca8,Cenpe,Ccnb1	5/12
GO Biological Processes	GO:0090232	Positive regulation of spindle checkpoint	-3.07998	-1.32224	Birc5,Incenp,Cdca8,Mad2l1,Ndc80	5/12
GO Biological Processes	GO:0090267	Positive regulation of mitotic cell cycle spindle assembly checkpoint	-3.07998	-1.32224	Birc5,Incenp,Cdca8,Mad2l1,Ndc80	5/12
GO Biological Processes	GO:0050672	Negative regulation of lymphocyte proliferation	-3.05656	-1.30363	Cd24a,Cd44,Cd80,Lilrb4b,Lilrb4a,Sftpd,Slfn1,Spn,Dlg5,Gpnmb,Cd276,Pawr,Ripor2,Il20rb,Zc3h12d,Vtcn1	16/96
GO Biological Processes	GO:0030193	Regulation of blood coagulation	-3.0316	-1.28183	Anxa5,Anxa2,Cd36,Cd9,F2rl1,Nfe2l2,Pdgfa,Serpine1,Plat,Plaur,S100a9,Thbs1,Tspan8	13/70
GO Biological Processes	GO:0097435	Supramolecular fiber organization	-3.02644	-1.27825	Actg1,App,Bax,Anxa2,Capg,Casq1,Cd36,Coro1a,Enah,Fat1,Gas7,Krt8,Stmn1,Arhgef2,Limk1,Limk2,Lox,Myo1f,Myo7b,Nck1,Nck2,Nedd9,Nin,Sirpa,Sgk1,Src,Tacc3,Tagln2,Tgfb2,Tpm1,Tpm2,Dpysl3,Vill,Twf2,Ldb3,Iqgap1,Rhog,Diaph3,Sh3d21,Loxl4,Spire1,Wdr73,Tpx2,Rflna,Kif2c,Rflnb,Krt23,Pls1,Pawr,Elmo1,Flna,Baiap2l2,Myo5c,Coro6,Pgm5,Spire2,Clip2,Cdsn,Iqgap3	59/562
GO Biological Processes	GO:0032945	Negative regulation of mononuclear cell proliferation	-3.00658	-1.26464	Cd24a,Cd44,Cd80,Lilrb4b,Lilrb4a,Sftpd,Slfn1,Spn,Dlg5,Gpnmb,Cd276,Pawr,Ripor2,Il20rb,Zc3h12d,Vtcn1	16/97
GO Biological Processes	GO:0050868	Negative regulation of T cell activation	-2.9147	-1.19741	Cd24a,Cd44,Cd80,Lilrb4b,Lilrb4a,Lgals3,Sftpd,Slfn1,Spn,Socs6,Dlg5,Gimap3,Gpnmb,Cd276,Pawr,Ripor2,Il20rb,Zc3h12d,Vtcn1,Nfkbid	20/137
GO Biological Processes	GO:1900046	Regulation of hemostasis	-2.91319	-1.19741	Anxa5,Anxa2,Cd36,Cd9,F2rl1,Nfe2l2,Pdgfa,Serpine1,Plat,Plaur,S100a9,Thbs1,Tspan8	13/72
GO Biological Processes	GO:0000912	Assembly of actomyosin apparatus involved in cytokinesis	-2.89235	-1.19741	Rtkn,Iqgap1,Anln,Iqgap3	4/8
GO Biological Processes	GO:0000915	Actomyosin contractile ring assembly	-2.89235	-1.19741	Rtkn,Iqgap1,Anln,Iqgap3	4/8
GO Biological Processes	GO:0044837	Actomyosin contractile ring organization	-2.89235	-1.19741	Rtkn,Iqgap1,Anln,Iqgap3	4/8
GO Biological Processes	GO:0000212	Meiotic spindle organization	-2.86819	-1.17878	Aspm,Ccnb2,Aurka,Ndc80,Espl1,Cenpe	6/19
GO Biological Processes	GO:0071675	Regulation of mononuclear cell migration	-2.84397	-1.15866	Adam8,App,C3ar1,Coro1a,Ccr2,Cx3cr1,Lgals3,Nedd9,Padi2,Serpine1,Ccl2,Ccl7,Cx3cl1,Spn,Stk10,Thbs1,Mapk3,Stk39,Ripor2	19/129
GO Biological Processes	GO:0002687	Positive regulation of leukocyte migration	-2.80545	-1.12555	Adam8,App,C3ar1,Coro1a,Ccr2,Cx3cr1,F2rl1,Lgals3,Myo1f,Nedd9,Serpine1,Ccl2,Ccl7,Cx3cl1,Spn,Thbs1,Vegfc,Tlr2,Mapk3,Stk39,Trem2,Pawr,Ripor2	23/170
GO Biological Processes	GO:0070374	Positive regulation of ERK1 and ERK2 cascade	-2.79958	-1.12103	App,Cd36,Cd44,Cxcr4,F2rl1,Jun,Pdgfa,Prkca,Rasgrp1,Ccl2,Ccl25,Ccl6,Ccl7,Cx3cl1,Src,Tnfrsf11a,Tlr2,Mapk3,Pdgfc,Fgf21,Trem2,Gpnmb,Ffar4,Npnt,Nrg1,Dnajc27,Gpr55,Gpr183,Glipr2	29/233
GO Biological Processes	GO:0032755	Positive regulation of interleukin-6 production	-2.79022	-1.113	App,Cd36,F2rl1,Ccn1,Il17ra,Arhgef2,Lpl,Mbp,Ncl,Tnf,Tlr2,Zbtb20,Inava,Spon2,Tmem106a,Rab7b,Plcg2	17/111
GO Biological Processes	GO:0032508	DNA duplex unwinding	-2.77915	-1.10593	Cdc45,Mcm3,Mcm2,Mcm4,Mcm5,Mcm6,Rad51,Gins3,Gins2	9/41
GO Biological Processes	GO:2000401	Regulation of lymphocyte migration	-2.7	-1.0462	Adam8,App,Coro1a,Ccr2,Nedd9,Padi2,Ccl2,Ccl7,Spn,Stk10,Stk39,Ripor2	12/67
GO Biological Processes	GO:0032731	Positive regulation of interleukin-1 beta production	-2.7	-1.0462	App,Cd36,F2rl1,Ccn1,Lpl,Tnf,Tlr2,Mefv,Panx1,Inava,Tmem106a,Ifi211	12/67
GO Biological Processes	GO:0006275	Regulation of DNA replication	-2.68679	-1.03425	Ccna2,Cdk1,Cdc7,Jun,Mas1,Mcm3,Mcm2,Mcm4,Mcm5,Mcm6,Dbf4,Cdt1,Ctc1,Esco2,Ticrr,Gins3,Rfc4,E2f8,Gins2	19/133
GO Biological Processes	GO:0070664	Negative regulation of leukocyte proliferation	-2.67982	-1.02854	Cd24a,Cd44,Cd80,Lilrb4b,Lilrb4a,Sftpd,Slfn1,Spn,Dlg5,Gpnmb,Cd276,Pawr,Ripor2,Il20rb,Zc3h12d,Vtcn1	16/104
GO Biological Processes	GO:1902808	Positive regulation of cell cycle G1/S phase transition	-2.66258	-1.01401	Apex1,Ccnd2,Cyp1a1,Rrm1,Stil,Tert,Dbf4,Anp32b,Fam83d,Lsm10,Plcg2	11/59
GO Biological Processes	GO:0031055	Chromatin remodeling at centromere	-2.66153	-1.01401	Cenpa,Oip5,Cenpn,Cenpi	4/9
GO Biological Processes	GO:0034080	CENP-A containing chromatin assembly	-2.66153	-1.01401	Cenpa,Oip5,Cenpn,Cenpi	4/9
GO Biological Processes	GO:0050670	Regulation of lymphocyte proliferation	-2.62769	-0.987772	Chrnb2,Slc7a1,Cd24a,Cd44,Cd80,Cdkn1a,Coro1a,Ccr2,Lilrb4b,Lilrb4a,Itgal,Lgals3,Nck1,Nck2,Nfatc2,Sftpd,Slfn1,Spn,Tgfbr2,Clcf1,Dlg5,Sash3,Gpnmb,Cd276,Pawr,Ripor2,Il20rb,Slc39a10,Zc3h12d,Vtcn1,Gpr183	31/261
GO Biological Processes	GO:0031349	Positive regulation of defense response	-2.595	-0.965638	Adam8,App,Cd14,Cd24a,Ccr2,Ctss,F2rl1,Il17ra,Lgals1,Lpl,Mmp12,Prkca,Serpine1,Rasgrp1,S100a9,Tgm2,Tnf,Tnfrsf11a,Plscr1,Ccn4,Tlr2,Mapk3,Pvr,Tlr5,Mefv,Nupr1,Clec7a,Tnip1,Rsad2,Zbp1,Slc15a3,Polr3d,Inava,Wdfy1,Sting1,Rftn1,Gimap3,Trem2,Trim6,Hmgb2,Lacc1,Oasl1,Plcg2,Oas3,Ifi211	45/421
GO Biological Processes	GO:0007292	Female gamete generation	-2.59483	-0.965638	Afp,Aspm,Ccnb2,Cdc25b,Inhbb,Plk1,Src,Aurka,Top2a,Ttk,Ndc80,Spire1,Sgo2a,Trip13,Hsf2bp,Ythdf2,Ncaph,Hrob,Cenpe,Spire2,Pde4d,Ccnb1	22/166
GO Biological Processes	GO:0050866	Negative regulation of cell activation	-2.58235	-0.957922	Cd24a,Cd44,Cd80,Cd9,Ccr2,Lilrb4b,Lilrb4a,Il13ra2,Lgals3,Pdgfa,Pparg,Cx3cl1,Sftpd,Slfn1,Spn,Socs6,Dlg5,Gimap3,Trem2,Gpnmb,Cd276,Abr,Pawr,Ripor2,Il20rb,Zc3h12d,Vtcn1,Nfkbid	28/230
GO Biological Processes	GO:1901978	Positive regulation of cell cycle checkpoint	-2.57725	-0.957523	Birc5,Incenp,Cdca8,Mad2l1,Ndc80	5/15
GO Biological Processes	GO:0002685	Regulation of leukocyte migration	-2.55213	-0.93822	Adam8,App,C3ar1,Cd9,Coro1a,Ccr2,Cx3cr1,F2rl1,Lgals3,Myo1f,Nedd9,Padi2,Serpine1,Ccl2,Ccl25,Ccl7,Cx3cl1,Spn,Stk10,Thbs1,Vegfc,Tlr2,Mapk3,Stk39,Smpd3,Trem2,Abr,Pawr,Ripor2	29/242
GO Biological Processes	GO:0032944	Regulation of mononuclear cell proliferation	-2.5262	-0.930312	Chrnb2,Slc7a1,Cd24a,Cd44,Cd80,Cdkn1a,Coro1a,Ccr2,Lilrb4b,Lilrb4a,Itgal,Lgals3,Nck1,Nck2,Nfatc2,Sftpd,Slfn1,Spn,Tgfbr2,Clcf1,Dlg5,Sash3,Gpnmb,Cd276,Pawr,Ripor2,Il20rb,Slc39a10,Zc3h12d,Vtcn1,Gpr183	31/265
GO Biological Processes	GO:0070663	Regulation of leukocyte proliferation	-2.50813	-0.918102	Chrnb2,Slc7a1,Cd24a,Cd44,Cd80,Cdkn1a,Coro1a,Ccr2,Csf2ra,Lilrb4b,Lilrb4a,Itgal,Lgals3,Nck1,Nck2,Nfatc2,Sftpd,Slfn1,Spn,Tgfbr2,Mapk3,Clcf1,Dlg5,Sash3,Gpnmb,Cd276,Pawr,Ripor2,Il20rb,Slc39a10,Zc3h12d,Vtcn1,Gpr183	33/288
GO Biological Processes	GO:0044843	Cell cycle G1/S phase transition	-2.48834	-0.90022	Ccna2,Ccnd2,Ccne1,Cdc25a,E2f1,E2f3,Myc,Pole,Gpr132,Anp32b,Rhou,Klf11,Iqgap3	13/80
GO Biological Processes	GO:1900087	Positive regulation of G1/S transition of mitotic cell cycle	-2.48446	-0.89963	Apex1,Ccnd2,Cyp1a1,Rrm1,Stil,Tert,Dbf4,Anp32b,Lsm10	9/45
GO Biological Processes	GO:0010935	Regulation of macrophage cytokine production	-2.48446	-0.89963	Cd36,Twist2,Tgfb2,Tlr2,Panx1,Irak3,Spon2,Plcg2,Nlrx1	9/45
GO Biological Processes	GO:0042129	Regulation of T cell proliferation	-2.46107	-0.89211	Slc7a1,Cd24a,Cd44,Cd80,Coro1a,Ccr2,Lilrb4b,Lilrb4a,Itgal,Lgals3,Nck1,Nck2,Sftpd,Slfn1,Spn,Tgfbr2,Dlg5,Sash3,Gpnmb,Cd276,Pawr,Ripor2,Il20rb,Zc3h12d,Vtcn1	25/202
GO Biological Processes	GO:0065004	Protein-DNA complex assembly	-2.45227	-0.884349	Cdc45,Cenpa,H1f3,Mcm2,Rad51,Sox9,Cenph,Chaf1a,Brf2,Cdt1,Med18,Anp32b,Oip5,Cenpn,Grwd1,Cenpi,Med9,Kntc1,Dlgap5,Cenpe,Cenpt	21/160
GO Biological Processes	GO:1903037	Regulation of leukocyte cell-cell adhesion	-2.44741	-0.88053	Actb,Adam8,Slc7a1,Cd24a,Cd44,Cd80,Cd83,Coro1a,Ccr2,Lilrb4b,Lilrb4a,Itgal,Itgb2,Lgals1,Lgals3,Nck1,Nck2,Sirpa,Rasgrp1,Ccl2,Ccl25,Sftpd,Slfn1,Sox4,Spn,Tgfbr2,Tnf,Vnn1,Socs6,Dusp10,Dlg5,Sash3,Gimap3,Gpnmb,Cd276,Pawr,Ripor2,Il20rb,Zc3h12d,Vtcn1,Nfkbid	41/382
GO Biological Processes	GO:0032506	Cytokinetic process	-2.40639	-0.847717	Kif20a,Rtkn,Iqgap1,Spire1,Anln,Cep55,Spire2,Iqgap3	8/38
GO Biological Processes	GO:0050867	Positive regulation of cell activation	-2.40336	-0.84571	Chrnb2,Actb,Adam8,Slc7a1,Cd24a,Cd80,Cd83,Cdkn1a,Coro1a,Ccr2,F2rl1,Lilrb4b,Lilrb4a,Itgal,Itgam,Itgb2,Jund,Lgals1,Nck1,Nck2,Nfatc2,Sirpa,Rasgrp1,Ccl2,Sox4,Spn,Tgfbr2,Thbs1,Tnf,Vnn1,Plek,Clec7a,Clcf1,Dusp10,Sash3,Gimap3,Trem2,Cd276,Flna,Hps1,Slc39a10,Hmces,Vtcn1,Nfkbid,Gpr183	45/431
GO Biological Processes	GO:1901623	Regulation of lymphocyte chemotaxis	-2.40134	-0.844699	Ccr2,Nedd9,Padi2,Ccl2,Ccl7,Stk39	6/23
GO Biological Processes	GO:1902806	Regulation of cell cycle G1/S phase transition	-2.38308	-0.828461	Actb,Apex1,Ccnd2,Cdkn1a,Cdkn2b,Cyp1a1,E2f1,Prmt2,Muc1,Rbl1,Rrm1,Ccl2,Stil,Slfn1,Tert,Dbf4,Plpp2,Anp32b,Fam83d,Gpnmb,Lsm10,Plcg2,Zc3h12d,Kif14	24/194
GO Biological Processes	GO:0002696	Positive regulation of leukocyte activation	-2.3755	-0.825967	Chrnb2,Actb,Adam8,Slc7a1,Cd24a,Cd80,Cd83,Cdkn1a,Coro1a,Ccr2,F2rl1,Lilrb4b,Lilrb4a,Itgal,Itgam,Itgb2,Jund,Lgals1,Nck1,Nck2,Nfatc2,Sirpa,Rasgrp1,Ccl2,Sox4,Spn,Tgfbr2,Thbs1,Tnf,Vnn1,Clec7a,Clcf1,Dusp10,Sash3,Gimap3,Trem2,Cd276,Hps1,Slc39a10,Hmces,Vtcn1,Nfkbid,Gpr183	43/409
GO Biological Processes	GO:0050920	Regulation of chemotaxis	-2.34616	-0.803465	Angpt2,App,C3ar1,Cxcr4,Ccr2,Cx3cr1,F2rl1,Nedd9,Ntrk3,Padi2,Prkca,Serpine1,Plxna3,Robo1,Ccl2,Ccl7,Cx3cl1,Sema3b,Sema4b,Sema4d,Stx3,Thbs1,Vegfc,Mapk3,Stk39,Trem2,Ripor2,Gpr183	28/239
GO Biological Processes	GO:0032467	Positive regulation of cytokinesis	-2.33337	-0.795551	Birc5,Cdc25b,Incenp,Kif3b,Cdca8,Kif23,Kif20b,Kif14	8/39
GO Biological Processes	GO:0070661	Leukocyte proliferation	-2.32665	-0.790761	Chrnb2,Bax,Cd24a,Coro1a,Cxcr4,F2rl1,Lilrb4a,Hells,Itgal,Itgam,Itgb2,Cd180,Myc,Rasgrp1,Cx3cl1,Slfn1,Spn,Impdh1,Ctps,Sash3,Trem2,Cd276,Il20rb,Zc3h12d	24/196
GO Biological Processes	GO:0002695	Negative regulation of leukocyte activation	-2.32226	-0.787339	Cd24a,Cd44,Cd80,Ccr2,Lilrb4b,Lilrb4a,Il13ra2,Lgals3,Pparg,Cx3cl1,Sftpd,Slfn1,Spn,Socs6,Dlg5,Gimap3,Gpnmb,Cd276,Abr,Pawr,Ripor2,Il20rb,Zc3h12d,Vtcn1,Nfkbid	25/207
GO Biological Processes	GO:0010755	Regulation of plasminogen activation	-2.31373	-0.786449	Serpine1,Plat,Plaur,Thbs1,Meltf	5/17
GO Biological Processes	GO:0051781	Positive regulation of cell division	-2.30149	-0.77797	Birc5,Btc,Cdc25b,Incenp,Kif3b,Pdgfa,Tgfb2,Vegfc,Cdca8,Pdgfc,Kif23,Kif20b,Kif14	13/84
GO Biological Processes	GO:0032392	DNA geometric change	-2.28838	-0.771379	Cdc45,Mcm3,Mcm2,Mcm4,Mcm5,Mcm6,Rad51,Gins3,Gins2	9/48
GO Biological Processes	GO:0071103	DNA conformation change	-2.27096	-0.758374	Cdc45,Mcm3,Mcm2,Mcm4,Mcm5,Mcm6,Rad51,Top2a,Gins3,Gins2	10/57
GO Biological Processes	GO:0061572	Actin filament bundle organization	-2.27078	-0.758374	Gas7,Limk1,Src,Dpysl3,Spire1,Rflna,Rflnb,Pls1,Pawr,Baiap2l2,Spire2	11/66
GO Biological Processes	GO:0002700	Regulation of production of molecular mediator of immune response	-2.26871	-0.757219	Cd36,Ccr2,Twist2,Evpl,F2rl1,Lilrb4b,Lilrb4a,Il13ra2,Ivl,Tgfb2,Tnf,Tlr2,Panx1,Clcf1,Rsad2,Inava,Irak3,Sash3,Gimap3,Trim6,Spon2,Lacc1,Hmces,Plcg2,Nlrx1	25/209
GO Biological Processes	GO:0002833	Positive regulation of response to biotic stimulus	-2.21515	-0.721534	Adam8,Cd14,Cd24a,F2rl1,Cd180,Ly86,Mmp12,Prkca,Rasgrp1,Tnf,Plscr1,Tlr2,Pvr,Tlr5,Mefv,Clec7a,Tnip1,Rsad2,Zbp1,Slc15a3,Polr3d,Inava,Wdfy1,Sting1,Rftn1,Gimap3,Trim6,Hmgb2,Lacc1,Oasl1,Plcg2,Oas3,Ifi211	33/301
GO Biological Processes	GO:2000045	Regulation of G1/S transition of mitotic cell cycle	-2.20559	-0.716333	Actb,Apex1,Ccnd2,Cdkn1a,Cdkn2b,Cyp1a1,E2f1,Prmt2,Muc1,Rbl1,Rrm1,Ccl2,Stil,Slfn1,Tert,Dbf4,Anp32b,Gpnmb,Lsm10,Zc3h12d,Kif14	21/168
GO Biological Processes	GO:0002690	Positive regulation of leukocyte chemotaxis	-2.19907	-0.713945	App,C3ar1,Ccr2,Cx3cr1,F2rl1,Nedd9,Serpine1,Ccl2,Ccl7,Cx3cl1,Thbs1,Vegfc,Mapk3,Stk39,Ripor2	15/106
GO Biological Processes	GO:0022616	DNA strand elongation	-2.19757	-0.713945	Lig1,Mcm3,Mcm4,Pole,Tert	5/18
GO Biological Processes	GO:1903039	Positive regulation of leukocyte cell-cell adhesion	-2.19682	-0.713945	Actb,Adam8,Slc7a1,Cd24a,Cd44,Cd80,Cd83,Coro1a,Ccr2,Lilrb4b,Lilrb4a,Itgal,Itgb2,Lgals1,Nck1,Nck2,Sirpa,Rasgrp1,Ccl2,Sox4,Spn,Tgfbr2,Tnf,Vnn1,Dusp10,Sash3,Gimap3,Cd276,Pawr,Vtcn1,Nfkbid	31/279
GO Biological Processes	GO:0098742	Cell-cell adhesion via plasma-membrane adhesion molecules	-2.16596	-0.692865	Cd24a,Cdh1,Cdh17,Cldn3,Dab1,Itga3,Itgal,Ajuba,Lgals1,Epcam,Mmp24,Robo1,Tgfb2,Tgfbr2,Tenm4,Pvr,Myot,Pcdh18,Igsf9,Igsf11,Nrg1,Dsg1c,Lrfn3	23/191
GO Biological Processes	GO:0050921	Positive regulation of chemotaxis	-2.15626	-0.683998	App,C3ar1,Cxcr4,Ccr2,Cx3cr1,F2rl1,Nedd9,Ntrk3,Prkca,Serpine1,Ccl2,Ccl7,Cx3cl1,Stx3,Thbs1,Vegfc,Mapk3,Stk39,Trem2,Ripor2	20/159
GO Biological Processes	GO:0032732	Positive regulation of interleukin-1 production	-2.14398	-0.674274	App,Cd36,F2rl1,Ccn1,Lpl,Tnf,Tlr2,Mefv,Panx1,Inava,Tmem106a,Ifi211	12/78
GO Biological Processes	GO:0000082	G1/S transition of mitotic cell cycle	-2.14398	-0.674274	Ccnd2,Ccne1,Cdc25a,E2f1,E2f3,Myc,Pole,Gpr132,Anp32b,Rhou,Klf11,Iqgap3	12/78
GO Biological Processes	GO:2000403	Positive regulation of lymphocyte migration	-2.1303	-0.66874	Adam8,App,Coro1a,Ccr2,Nedd9,Ccl7,Spn,Stk39	8/42
GO Biological Processes	GO:0046651	Lymphocyte proliferation	-2.09098	-0.637646	Chrnb2,Bax,Cd24a,Coro1a,Cxcr4,Lilrb4a,Hells,Itgal,Itgam,Itgb2,Cd180,Myc,Rasgrp1,Slfn1,Spn,Impdh1,Ctps,Sash3,Cd276,Il20rb,Zc3h12d	21/172
GO Biological Processes	GO:0071902	Positive regulation of protein serine/threonine kinase activity	-2.08712	-0.636807	Adam8,App,Ccnd2,Cd24a,Il1rn,Ajuba,Ntrk3,Pak1,Pdgfa,Rasgrp1,Robo1,Stil,Src,Thbs1,Tnf,Tnfrsf11a,Iqgap1,Camk1,Arhgef5,Pdgfc,Psrc1,Dab2ip,Gpr39,Map3k13	24/205
GO Biological Processes	GO:0051251	Positive regulation of lymphocyte activation	-2.06971	-0.621769	Chrnb2,Actb,Adam8,Slc7a1,Cd24a,Cd80,Cd83,Cdkn1a,Coro1a,Ccr2,Lilrb4b,Lilrb4a,Itgal,Lgals1,Nck1,Nck2,Nfatc2,Sirpa,Rasgrp1,Ccl2,Sox4,Spn,Tgfbr2,Vnn1,Clec7a,Clcf1,Dusp10,Sash3,Gimap3,Cd276,Hps1,Slc39a10,Hmces,Vtcn1,Nfkbid,Gpr183	36/343
GO Biological Processes	GO:0071677	Positive regulation of mononuclear cell migration	-2.05684	-0.614381	Adam8,App,Coro1a,Ccr2,Cx3cr1,Lgals3,Nedd9,Serpine1,Ccl2,Ccl7,Spn,Stk39	12/80
GO Biological Processes	GO:0030194	Positive regulation of blood coagulation	-2.03722	-0.604093	Cd36,Nfe2l2,Serpine1,Plat,S100a9,Thbs1	6/27
GO Biological Processes	GO:1900048	Positive regulation of hemostasis	-2.03722	-0.604093	Cd36,Nfe2l2,Serpine1,Plat,S100a9,Thbs1	6/27
GO Biological Processes	GO:0032943	Mononuclear cell proliferation	-2.0086	-0.592359	Chrnb2,Bax,Cd24a,Coro1a,Cxcr4,Lilrb4a,Hells,Itgal,Itgam,Itgb2,Cd180,Myc,Rasgrp1,Slfn1,Spn,Impdh1,Ctps,Sash3,Cd276,Il20rb,Zc3h12d	21/175
GO Biological Processes	GO:0006271	DNA strand elongation involved in DNA replication	-2.00476	-0.592359	Lig1,Mcm3,Mcm4,Pole	4/13

## Sheet: Supplementary Table 8
Supplementary Table 8. GO analysis of up-regulated genes in the liver of control mice and METTL3Δhep mice (JAX) from RNA-seq data deposited in NCBI GEO under the accession number GSE176113.
Category	Term	Description	LogP	Log(q-value)	Symbols	InTerm_InList
GO Biological Processes	GO:0000278	Mitotic cell cycle	-5.54222	-1.44692	Brca2,Ccnb2,Cdk1,Cdkn1a,Chek1,Mcm2,Mcm6,Myc,Kif20a,Tubb2a,Knstrn,Tuba8,Psrc1,Smpd3,Cdca5,Trip13,Fam110a,Ckap2,Bmyc,Cdc20,Klf11,Map9,Ccnb1,Kifc1	24/579
GO Biological Processes	GO:1903047	Mitotic cell cycle process	-5.49437	-1.44692	Brca2,Ccnb2,Cdk1,Cdkn1a,Chek1,Mcm2,Mcm6,Myc,Kif20a,Knstrn,Psrc1,Smpd3,Cdca5,Trip13,Fam110a,Ckap2,Bmyc,Cdc20,Klf11,Map9,Ccnb1,Kifc1	22/503
GO Biological Processes	GO:0000226	Microtubule cytoskeleton organization	-4.84617	-1.09975	Brca2,Ccnb2,Cdk1,Foxj1,Kif20a,Tubb2a,Knstrn,Tuba8,Ccdc120,Psrc1,Aunip,Fam110a,Cdc20,Dnah5,Dnah1,Cfap44,Map9,Spire2,Ccnb1,Clip2,Smok3a,Kifc1	22/553
GO Biological Processes	GO:0010564	Regulation of cell cycle process	-4.33104	-0.68153	Brca2,Cdk1,Cdkn1a,Chek1,Cyp1a1,Fen1,Myc,Kif20a,Rad51b,Ccl2,Sox9,Ubd,Knstrn,Psrc1,Smpd3,Cdca5,Trip13,Gpnmb,Bmyc,Cdc20,Map9,Dyrk3,Zc3h12d,Ccnb1,Kifc1	25/731
GO Biological Processes	GO:0009137	Purine nucleoside diphosphate catabolic process	-3.82737	-0.47889	Entpd2,Nt5e,Nudt18	3/8
GO Biological Processes	GO:0009181	Purine ribonucleoside diphosphate catabolic process	-3.82737	-0.47889	Entpd2,Nt5e,Nudt18	3/8
GO Biological Processes	GO:0060054	Positive regulation of epithelial cell proliferation involved in wound healing	-3.65585	-0.365517	Cldn1,Mmp12,Eppk1	3/9
GO Biological Processes	GO:0007346	Regulation of mitotic cell cycle	-3.43614	-0.316941	Brca2,Btg2,Cdk1,Cdkn1a,Chek1,Cyp1a1,Myc,Rad51b,Ccl2,Ubd,Smpd3,Cdca5,Trip13,Gpnmb,Cdc20,Zc3h12d,Ccnb1,Bex4	18/509
GO Biological Processes	GO:0071466	Cellular response to xenobiotic stimulus	-3.42624	-0.316941	Cyp1a1,Cyp2b10,Gsta1,Gsta2,Gstm2,Gstm3,Myc,Cyp2c55,Bmyc,Cyp2a22	10/189
GO Biological Processes	GO:0043903	Regulation of biological process involved in symbiotic interaction	-3.39884	-0.316941	F2rl1,Lgals1,Sftpd,Tmprss2,Trim59,Tmprss4	6/68
GO Biological Processes	GO:0051276	Chromosome organization	-3.36181	-0.316941	Brca2,Cdk1,Mcm2,Mcm6,Myc,Knstrn,Psrc1,Cdca5,Trip13,Esco2,Bmyc,Cdc20,Map9,Ccnb1,Gins2,Kifc1	16/429
GO Biological Processes	GO:0006334	Nucleosome assembly	-3.33064	-0.316941	Mcm2,Sox9,Chaf1a,H3c4,H3c2,H3c13	6/70
GO Biological Processes	GO:0045787	Positive regulation of cell cycle	-3.3041	-0.316941	Brca2,Cdk1,Chek1,Cyp1a1,Fen1,Myc,Rad51b,Src,Psrc1,Smpd3,Cdca5,Cdc20,Dyrk3,Ccnb1	14/350
GO Biological Processes	GO:0006805	Xenobiotic metabolic process	-3.29533	-0.316941	Cyp1a1,Cyp2b10,Gsta1,Gsta2,Gstm2,Gstm3,Cyp2c55,Cyp2a22	8/129
GO Biological Processes	GO:0001676	Long-chain fatty acid metabolic process	-3.27301	-0.316941	Cyp1a1,Cyp2b10,Gstm2,Gstm3,Acot1,Cyp2c55,Acot2,Cyp2a22	8/130
GO Biological Processes	GO:0000280	Nuclear division	-3.27103	-0.316941	Brca2,Ccnb2,Knstrn,Psrc1,Smpd3,Fignl1,Cdca5,Trip13,Cdc20,Map9,Spire2,Ccnb1,Kifc1	13/312
GO Biological Processes	GO:0098813	Nuclear chromosome segregation	-3.26155	-0.316941	Brca2,Ccnb2,Knstrn,Psrc1,Cdca5,Trip13,Knl1,Cdc20,Map9,Ccnb1,Kifc1	11/235
GO Biological Processes	GO:0009191	Ribonucleoside diphosphate catabolic process	-3.25139	-0.316941	Entpd2,Nt5e,Nudt18	3/12
GO Biological Processes	GO:0000727	Double-strand break repair via break-induced replication	-3.25139	-0.316941	Mcm2,Mcm6,Gins2	3/12
GO Biological Processes	GO:0006302	Double-strand break repair	-3.25045	-0.316941	Brca2,Mcm2,Mcm6,Rad51b,Cdca5,Trip13,Aunip,Esco2,Kdm4d,Gins2	10/199
GO Biological Processes	GO:0009135	Purine nucleoside diphosphate metabolic process	-3.14201	-0.27065	Entpd2,Nt5e,Nudt18	3/13
GO Biological Processes	GO:0009179	Purine ribonucleoside diphosphate metabolic process	-3.14201	-0.27065	Entpd2,Nt5e,Nudt18	3/13
GO Biological Processes	GO:0007059	Chromosome segregation	-3.10658	-0.259239	Brca2,Ccnb2,Knstrn,Psrc1,Cdca5,Trip13,Esco2,Knl1,Cdc20,Map9,Ccnb1,Bex4,Kifc1	13/325
GO Biological Processes	GO:0018210	Peptidyl-threonine modification	-3.0795	-0.259239	Cdk1,Chek1,Galnt3,Dyrk3,Mylk2,Wnk3	6/78
GO Biological Processes	GO:0048146	Positive regulation of fibroblast proliferation	-3.0503	-0.259239	Anxa2,Cdkn1a,Myc,Pdgfc,Bmyc,Ccnb1	6/79
GO Biological Processes	GO:0046598	Positive regulation of viral entry into host cell	-3.04183	-0.259239	Lgals1,Tmprss2,Tmprss4	3/14
GO Biological Processes	GO:0075294	Positive regulation by symbiont of entry into host	-3.04183	-0.259239	Lgals1,Tmprss2,Tmprss4	3/14
GO Biological Processes	GO:1902969	Mitotic DNA replication	-3.04183	-0.259239	Brca2,Mcm2,Mcm6	3/14
GO Biological Processes	GO:0000724	Double-strand break repair via homologous recombination	-3.0132	-0.244502	Brca2,Mcm2,Mcm6,Rad51b,Aunip,Kdm4d,Gins2	7/110
GO Biological Processes	GO:0042130	Negative regulation of T cell proliferation	-2.99322	-0.239922	Foxj1,Sftpd,Dlg5,Gpnmb,Zc3h12d,Vtcn1	6/81
GO Biological Processes	GO:1902751	Positive regulation of cell cycle G2/M phase transition	-2.98634	-0.239922	Cdk1,Rad51b,Dyrk3,Ccnb1	4/32
GO Biological Processes	GO:0009134	Nucleoside diphosphate catabolic process	-2.94947	-0.231184	Entpd2,Nt5e,Nudt18	3/15
GO Biological Processes	GO:0048285	Organelle fission	-2.93989	-0.231184	Brca2,Ccnb2,Knstrn,Psrc1,Smpd3,Fignl1,Cdca5,Trip13,Cdc20,Map9,Spire2,Ccnb1,Kifc1	13/339
GO Biological Processes	GO:0042178	Xenobiotic catabolic process	-2.93504	-0.231184	Cyp1a1,Cyp2b10,Gstm2,Gstm3	4/33
GO Biological Processes	GO:0000725	Recombinational repair	-2.92232	-0.231184	Brca2,Mcm2,Mcm6,Rad51b,Aunip,Kdm4d,Gins2	7/114
GO Biological Processes	GO:1901990	Regulation of mitotic cell cycle phase transition	-2.91691	-0.231184	Cdk1,Cdkn1a,Chek1,Cyp1a1,Rad51b,Ccl2,Ubd,Cdca5,Trip13,Gpnmb,Cdc20,Zc3h12d,Ccnb1	13/341
GO Biological Processes	GO:1901987	Regulation of cell cycle phase transition	-2.81534	-0.175745	Brca2,Cdk1,Cdkn1a,Chek1,Cyp1a1,Rad51b,Ccl2,Ubd,Cdca5,Trip13,Gpnmb,Cdc20,Dyrk3,Zc3h12d,Ccnb1	15/438
GO Biological Processes	GO:1901989	Positive regulation of cell cycle phase transition	-2.81423	-0.175745	Cdk1,Cyp1a1,Rad51b,Cdca5,Cdc20,Dyrk3,Ccnb1	7/119
GO Biological Processes	GO:0007064	Mitotic sister chromatid cohesion	-2.78406	-0.175745	Cdca5,Esco2,Cdc20	3/17
GO Biological Processes	GO:0015693	Magnesium ion transport	-2.78406	-0.175745	Slc41a3,Mmgt2,Nipa1	3/17
GO Biological Processes	GO:0034728	Nucleosome organization	-2.78099	-0.175745	Mcm2,Sox9,Chaf1a,H3c4,H3c2,H3c13	6/89
GO Biological Processes	GO:0140014	Mitotic nuclear division	-2.77748	-0.175745	Knstrn,Psrc1,Smpd3,Cdca5,Cdc20,Map9,Ccnb1,Kifc1	8/155
GO Biological Processes	GO:0051310	Metaphase plate congression	-2.76835	-0.175745	Brca2,Psrc1,Cdca5,Ccnb1,Kifc1	5/61
GO Biological Processes	GO:0006749	Glutathione metabolic process	-2.76835	-0.175745	Gsta1,Gsta2,Gstm2,Gstm3,Ggt6	5/61
GO Biological Processes	GO:0006974	DNA damage response	-2.75762	-0.172566	Brca2,Btg2,Cdk1,Cdkn1a,Chek1,Fen1,Mcm2,Mcm6,Myc,Uhrf1,Rad51b,Exo1,Chaf1a,Phlda3,Cdca5,Trip13,Aunip,Esco2,Bmyc,Kdm4d,Gins2	21/730
GO Biological Processes	GO:0007051	Spindle organization	-2.70786	-0.144714	Ccnb2,Knstrn,Aunip,Fam110a,Cdc20,Map9,Ccnb1,Kifc1	8/159
GO Biological Processes	GO:0008285	Negative regulation of cell population proliferation	-2.65895	-0.109807	Brca2,Btg2,Ddr1,Cdkn1a,Adgrg1,Foxj1,Myc,Ndrg1,Ccl2,Sftpd,Sox4,Sox9,Dlg5,Gpnmb,Sh3bp4,Bmyc,Klf11,Eppk1,Niban2,Zc3h12d,Vtcn1	21/744
GO Biological Processes	GO:0000070	Mitotic sister chromatid segregation	-2.61447	-0.0848008	Knstrn,Psrc1,Cdca5,Cdc20,Map9,Ccnb1,Kifc1	7/129
GO Biological Processes	GO:1901992	Positive regulation of mitotic cell cycle phase transition	-2.61374	-0.0848008	Cdk1,Cyp1a1,Rad51b,Cdca5,Cdc20,Ccnb1	6/96
GO Biological Processes	GO:0050672	Negative regulation of lymphocyte proliferation	-2.61374	-0.0848008	Foxj1,Sftpd,Dlg5,Gpnmb,Zc3h12d,Vtcn1	6/96
GO Biological Processes	GO:0032945	Negative regulation of mononuclear cell proliferation	-2.59109	-0.0821322	Foxj1,Sftpd,Dlg5,Gpnmb,Zc3h12d,Vtcn1	6/97
GO Biological Processes	GO:0045931	Positive regulation of mitotic cell cycle	-2.57691	-0.0821322	Brca2,Cdk1,Cyp1a1,Rad51b,Cdca5,Cdc20,Ccnb1	7/131
GO Biological Processes	GO:1901991	Negative regulation of mitotic cell cycle phase transition	-2.57537	-0.0821322	Cdk1,Cdkn1a,Chek1,Ccl2,Trip13,Gpnmb,Cdc20,Zc3h12d	8/167
GO Biological Processes	GO:0006268	DNA unwinding involved in DNA replication	-2.57328	-0.0821322	Mcm2,Mcm6,Gins2	3/20
GO Biological Processes	GO:2000279	Negative regulation of DNA biosynthetic process	-2.54126	-0.0608374	Cdkn1a,Chek1,Src,Niban2	4/42
GO Biological Processes	GO:0000819	Sister chromatid segregation	-2.54009	-0.0608374	Knstrn,Psrc1,Cdca5,Cdc20,Map9,Ccnb1,Kifc1	7/133
GO Biological Processes	GO:0018107	Peptidyl-threonine phosphorylation	-2.53182	-0.0584061	Cdk1,Chek1,Dyrk3,Mylk2,Wnk3	5/69
GO Biological Processes	GO:0061041	Regulation of wound healing	-2.48619	-0.0338986	Anxa2,Cldn1,Cldn4,F2rl1,Ccl2,Tspan8,Eppk1	7/136
GO Biological Processes	GO:0009410	Response to xenobiotic stimulus	-2.48063	-0.0338986	Cyp1a1,Cyp2b10,Gsta1,Gsta2,Gstm2,Gstm3,Lcn2,Myc,Cyp2c55,Bmyc,Cyp2a22,Serpina7	12/338
GO Biological Processes	GO:0006281	DNA repair	-2.4715	-0.0338986	Brca2,Chek1,Fen1,Mcm2,Mcm6,Uhrf1,Rad51b,Exo1,Chaf1a,Cdca5,Trip13,Aunip,Esco2,Kdm4d,Gins2	15/476
GO Biological Processes	GO:0050868	Negative regulation of T cell activation	-2.46856	-0.0338986	Foxj1,Sftpd,Socs6,Dlg5,Gpnmb,Zc3h12d,Vtcn1	7/137
GO Biological Processes	GO:0035634	Response to stilbenoid	-2.45172	-0.0324759	Gsta1,Gsta2,Ly6d	3/22
GO Biological Processes	GO:0071459	Protein localization to chromosome, centromeric region	-2.45172	-0.0324759	Cdk1,Knl1,H2ac4	3/22
GO Biological Processes	GO:0070664	Negative regulation of leukocyte proliferation	-2.44034	-0.0263566	Foxj1,Sftpd,Dlg5,Gpnmb,Zc3h12d,Vtcn1	6/104
GO Biological Processes	GO:0033260	Nuclear DNA replication	-2.34208	0	Brca2,Mcm2,Mcm6	3/24
GO Biological Processes	GO:0007080	Mitotic metaphase plate congression	-2.32982	0	Psrc1,Cdca5,Ccnb1,Kifc1	4/48
GO Biological Processes	GO:0051303	Establishment of chromosome localization	-2.32641	0	Brca2,Psrc1,Cdca5,Ccnb1,Kifc1	5/77
GO Biological Processes	GO:0051052	Regulation of DNA metabolic process	-2.31275	0	Cdk1,Cdkn1a,Chek1,Mas1,Mcm2,Mcm6,Myc,Src,Fignl1,Aunip,Esco2,Bmyc,Niban2,Spire2,Kdm4d,Gins2	16/544
GO Biological Processes	GO:0045930	Negative regulation of mitotic cell cycle	-2.31037	0	Btg2,Cdk1,Cdkn1a,Chek1,Ccl2,Trip13,Gpnmb,Cdc20,Zc3h12d	9/225
GO Biological Processes	GO:0009185	Ribonucleoside diphosphate metabolic process	-2.29108	0	Entpd2,Nt5e,Nudt18	3/25
GO Biological Processes	GO:0044786	Cell cycle DNA replication	-2.29108	0	Brca2,Mcm2,Mcm6	3/25
GO Biological Processes	GO:0090102	Cochlea development	-2.26617	0	Atp2b2,Mcm2,Sox9,Ptk7	4/50
GO Biological Processes	GO:0010332	Response to gamma radiation	-2.26617	0	Brca2,Cdkn1a,Myc,Bmyc	4/50
GO Biological Processes	GO:0044772	Mitotic cell cycle phase transition	-2.23846	0	Ccnb2,Cdk1,Chek1,Myc,Bmyc,Klf11,Ccnb1	7/151
GO Biological Processes	GO:0042060	Wound healing	-2.23301	0	Anxa8,Ddr1,Entpd2,Cdkn1a,Cldn1,Evpl,F2rl1,Mmp12,Ptk7,Eppk1	10/274
GO Biological Processes	GO:1902749	Regulation of cell cycle G2/M phase transition	-2.22782	0	Cdk1,Cdkn1a,Chek1,Rad51b,Dyrk3,Ccnb1	6/115
GO Biological Processes	GO:1903038	Negative regulation of leukocyte cell-cell adhesion	-2.22313	0	Foxj1,Sftpd,Socs6,Dlg5,Gpnmb,Zc3h12d,Vtcn1	7/152
GO Biological Processes	GO:0051301	Cell division	-2.19249	0	Ccnb2,Cdk1,Hells,Kif20a,Knstrn,Psrc1,Cdca5,Knl1,Ckap2,Cdc20,Map9,Dyrk3,Spire2,Ercc6l,Ccnb1	15/511
GO Biological Processes	GO:0050000	Chromosome localization	-2.18887	0	Brca2,Psrc1,Cdca5,Ccnb1,Kifc1	5/83
GO Biological Processes	GO:0046596	Regulation of viral entry into host cell	-2.17617	0	Lgals1,Tmprss2,Trim59,Tmprss4	4/53
GO Biological Processes	GO:0006310	DNA recombination	-2.16674	0	Brca2,Mcm2,Mcm6,Rad51b,Exo1,Trip13,Aunip,Kdm4d,Gins2	9/237
GO Biological Processes	GO:0032787	Monocarboxylic acid metabolic process	-2.15307	0	Cyp1a1,Cyp2b10,Gstm2,Gstm3,Acot1,Hao2,Cyp2c55,Chst14,Elovl7,Ankrd23,Pgd,Acot2,Cyp2a22,Acsm4,Phgdh,Dhrs9	16/566
GO Biological Processes	GO:1903902	Positive regulation of viral life cycle	-2.151	0	Lgals1,Tmprss2,Tmprss4	3/28
GO Biological Processes	GO:0006631	Fatty acid metabolic process	-2.1117	0	Cyp1a1,Cyp2b10,Gstm2,Gstm3,Acot1,Hao2,Cyp2c55,Elovl7,Ankrd23,Acot2,Cyp2a22,Acsm4	12/377
GO Biological Processes	GO:0010971	Positive regulation of G2/M transition of mitotic cell cycle	-2.10808	0	Cdk1,Rad51b,Ccnb1	3/29
GO Biological Processes	GO:0042537	Benzene-containing compound metabolic process	-2.10808	0	Gstm2,Gstm3,Hao2	3/29
GO Biological Processes	GO:0065004	Protein-DNA complex assembly	-2.10517	0	Mcm2,Sox9,Chaf1a,Brf2,H3c4,H3c2,H3c13	7/160
GO Biological Processes	GO:0033047	Regulation of mitotic sister chromatid segregation	-2.09206	0	Cdk1,Trip13,Cdc20,Ccnb1	4/56
GO Biological Processes	GO:0034502	Protein localization to chromosome	-2.08341	0	Brca2,Cdk1,Esco2,Knl1,H2ac4	5/88
GO Biological Processes	GO:0033044	Regulation of chromosome organization	-2.07675	0	Cdk1,Fen1,Mcm2,Myc,Src,Trip13,Bmyc,Cdc20,Ccnb1	9/245
GO Biological Processes	GO:0044770	Cell cycle phase transition	-2.06299	0	Ccnb2,Cdk1,Chek1,Myc,Bmyc,Klf11,Ccnb1	7/163
GO Biological Processes	GO:0048145	Regulation of fibroblast proliferation	-2.04017	0	Anxa2,Cdkn1a,Myc,Pdgfc,Bmyc,Ccnb1	6/126
GO Biological Processes	GO:0052372	Modulation by symbiont of entry into host	-2.03894	0	Lgals1,Tmprss2,Trim59,Tmprss4	4/58
GO Biological Processes	GO:0002683	Negative regulation of immune system process	-2.03327	0	F2rl1,Gpx2,Foxj1,Acod1,Mmp12,Myc,Ccl2,Sftpd,Sox9,Socs6,Dlg5,Gpnmb,Bmyc,Zc3h12d,Vtcn1	15/533
GO Biological Processes	GO:0001556	Oocyte maturation	-2.02712	0	Brca2,Trip13,Ccnb1	3/31
GO Biological Processes	GO:0009132	Nucleoside diphosphate metabolic process	-2.02712	0	Entpd2,Nt5e,Nudt18	3/31

## Sheet: Supplementary Table 9
Supplementary Table 9. GO analysis of up-regulated genes in the liver of control mice and METTL3Δhep mice (GPT) at 1 week after birth from RNA-seq data deposited in NCBI GEO under the accession number GSE198512.
Category	Term	Description	LogP	Log(q-value)	Symbols	InTerm_InList
GO Biological Processes	GO:0009615	Response to virus	-12.3051	-8.11599	Bax,Ifi44l,Cxcl10,Ifi204,Ifit1,Ifit2,Ifit3,Mmp12,Mx1,Smpd1,Oas1g,Oasl2,Irf7,Rsad2,Rtp4,Ndufaf4,Bst2,Ifi27l2a,Dhx58,Trim6,Duox2,Ifi27l2b,Oasl1,Oas3,Oas1a,Ifi211,Ifi213,Ifit3b,Ifit1bl1,Ifi208,Isg15,Ifi206	32/329
GO Biological Processes	GO:0035456	Response to interferon-beta	-10.8303	-6.94222	Ifi204,Ifit1,Ifit3,Oas1g,Gbp3,Bst2,Trim6,Cdc34,Oas1a,Xaf1,Ifi211,Ifi213,Ifi208,Tgtp2,Ifi206	15/71
GO Biological Processes	GO:0045071	Negative regulation of viral genome replication	-10.2685	-6.6178	Ifi204,Oas1g,Oasl2,Rsad2,Bst2,Trim6,Oasl1,Oas3,Oas1a,Ifi211,Ifi213,Ifi208,Isg15,Ifi206	14/65
GO Biological Processes	GO:0051607	Defense response to virus	-10.1441	-6.6178	Ifi44l,Cxcl10,Ifi204,Ifit1,Ifit2,Ifit3,Oas1g,Oasl2,Irf7,Rsad2,Rtp4,Ndufaf4,Bst2,Dhx58,Trim6,Ifi27l2b,Oasl1,Oas3,Oas1a,Ifi211,Ifi213,Ifit3b,Ifit1bl1,Ifi208,Isg15,Ifi206	26/266
GO Biological Processes	GO:0140546	Defense response to symbiont	-10.1079	-6.6178	Ifi44l,Cxcl10,Ifi204,Ifit1,Ifit2,Ifit3,Oas1g,Oasl2,Irf7,Rsad2,Rtp4,Ndufaf4,Bst2,Dhx58,Trim6,Ifi27l2b,Oasl1,Oas3,Oas1a,Ifi211,Ifi213,Ifit3b,Ifit1bl1,Ifi208,Isg15,Ifi206	26/267
GO Biological Processes	GO:0035458	Cellular response to interferon-beta	-9.42193	-6.01099	Ifi204,Ifit1,Ifit3,Oas1g,Gbp3,Trim6,Cdc34,Oas1a,Ifi211,Ifi213,Ifi208,Tgtp2,Ifi206	13/62
GO Biological Processes	GO:0045069	Regulation of viral genome replication	-7.69618	-4.35218	Ifi204,Oas1g,Oasl2,Rsad2,Bst2,Trim6,Oasl1,Oas3,Oas1a,Ifi211,Ifi213,Ifi208,Isg15,Ifi206	14/100
GO Biological Processes	GO:0048525	Negative regulation of viral process	-7.1091	-3.82309	Ifi204,Oas1g,Oasl2,Rsad2,Bst2,Trim6,Oasl1,Oas3,Oas1a,Ifi211,Ifi213,Ifi208,Isg15,Ifi206	14/111
GO Biological Processes	GO:0045824	Negative regulation of innate immune response	-6.35738	-3.12253	Ifi204,Mmp12,Oas1g,Klrb1b,Dhx58,Ythdf2,Oas3,Oas1a,Ifi211,Ifi213,Ifi208,Isg15,Ifi206	13/109
GO Biological Processes	GO:0072332	Intrinsic apoptotic signaling pathway by p53 class mediator	-5.86634	-2.67724	Bax,Ifi204,Stk11,Phlda3,Aen,Eda2r,Ifi211,Ifi213,Ifi208,Ifi206	10/68
GO Biological Processes	GO:1903900	Regulation of viral life cycle	-5.80477	-2.65706	Ifi204,Smpd1,Oas1g,Oasl2,Rsad2,Bst2,Trim6,Oasl1,Oas3,Oas1a,Ifi211,Ifi213,Ifi208,Isg15,Ifi206	15/162
GO Biological Processes	GO:0050792	Regulation of viral process	-5.57528	-2.49698	Ifi204,Smpd1,Dynlt1b,Oas1g,Oasl2,Rsad2,Bst2,Trim6,Oasl1,Oas3,Oas1a,Ifi211,Ifi213,Ifi208,Isg15,Ifi206	16/191
GO Biological Processes	GO:0140972	Negative regulation of AIM2 inflammasome complex assembly	-5.57214	-2.49698	Ifi204,Ifi211,Ifi213,Ifi208,Ifi206	5/12
GO Biological Processes	GO:0060338	Regulation of type I interferon-mediated signaling pathway	-5.51824	-2.47527	Mmp12,Oas1g,Irf7,Trim6,Ythdf2,Oas3,Oas1a,Isg15	8/44
GO Biological Processes	GO:0002832	Negative regulation of response to biotic stimulus	-5.39699	-2.40298	Ifi204,Mmp12,Oas1g,Spink5,Klrb1b,Dhx58,Ythdf2,Oas3,Oas1a,Ifi211,Ifi213,Ifi208,Isg15,Ifi206	14/153
GO Biological Processes	GO:0072331	Signal transduction by p53 class mediator	-5.38796	-2.40298	Bax,Ifi204,Stk11,Usp10,Phlda3,Aen,Eda2r,Ifi211,Ifi213,Ifi208,Ifi206	11/94
GO Biological Processes	GO:0140971	Regulation of AIM2 inflammasome complex assembly	-5.18437	-2.22572	Ifi204,Ifi211,Ifi213,Ifi208,Ifi206	5/14
GO Biological Processes	GO:0060339	Negative regulation of type I interferon-mediated signaling pathway	-5.11432	-2.18049	Mmp12,Oas1g,Ythdf2,Oas3,Oas1a,Isg15	6/24
GO Biological Processes	GO:0060700	Regulation of ribonuclease activity	-4.86051	-1.95016	Oas1g,Oasl2,Oasl1,Oas3,Oas1a	5/16
GO Biological Processes	GO:0050777	Negative regulation of immune response	-4.81812	-1.93005	Foxj1,Ifi204,Mmp12,Oas1g,Spink5,Klrb1b,Dhx58,Il20rb,Ythdf2,Oas3,Oas1a,Ifi211,Ifi213,Ifi208,Isg15,Ifi206	16/219
GO Biological Processes	GO:0035457	Cellular response to interferon-alpha	-4.45769	-1.59081	Ifi204,Ifit1,Ifit2,Oas1g,Oas1a	5/19
GO Biological Processes	GO:0035455	Response to interferon-alpha	-4.42989	-1.58321	Ifi204,Ifit1,Ifit2,Oas1g,Bst2,Oas1a	6/31
GO Biological Processes	GO:0140374	Antiviral innate immune response	-3.9638	-1.13643	Ifit2,Ifit3,Oas1g,Dhx58,Trim6,Oas1a,Ifit3b	7/53
GO Biological Processes	GO:0097193	Intrinsic apoptotic signaling pathway	-3.80717	-0.998282	Bax,Ifi204,Stk11,Phlda3,Rnf186,Aen,Scn2a,Ifi27l2b,Eda2r,Ifi211,Ifi213,Ifi208,Ifi206	13/187
GO Biological Processes	GO:0030224	Monocyte differentiation	-3.75726	-0.983134	Ifi204,Ifi211,Ifi213,Ifi208,Ifi206	5/26
GO Biological Processes	GO:1901857	Positive regulation of cellular respiration	-3.75726	-0.983134	Opn3,Oas1g,Chchd4,Gadd45gip1,Oas1a	5/26
GO Biological Processes	GO:0045089	Positive regulation of innate immune response	-3.73463	-0.976894	Ifi204,Mmp12,Oas1g,Irf7,Gbp3,Clec7a,Rsad2,Dhx58,Trim6,Oasl1,Oas3,Oas1a,Ifi211,Ifi213,Ifi208,Ifi206	16/270
GO Biological Processes	GO:0010212	Response to ionizing radiation	-3.71246	-0.97052	Bax,Ifi204,Smpd1,Stk11,Aen,Ddias,Bmyc,Ifi211,Ifi213,Ifi208,Ifi206	11/142
GO Biological Processes	GO:0002833	Positive regulation of response to biotic stimulus	-3.68318	-0.956481	Ifi204,Mmp12,Oas1g,Irf7,Gbp3,Clec7a,Rsad2,Dhx58,Trim6,Mmrn2,Oasl1,Oas3,Oas1a,Ifi211,Ifi213,Ifi208,Ifi206	17/301
GO Biological Processes	GO:0032069	Regulation of nuclease activity	-3.59775	-0.885779	Oas1g,Oasl2,Oasl1,Oas3,Oas1a	5/28
GO Biological Processes	GO:0097267	Omega-hydroxylase P450 pathway	-3.53111	-0.833374	Cyp4a12b,Cyp2u1,Cyp4a12a	3/7
GO Biological Processes	GO:0120254	Olefinic compound metabolic process	-3.4806	-0.798083	Cyp17a1,Cyp4a12b,Cyp4a14,Gstp2,Cyp2u1,Cyp2c55,Sdr16c5,Cyp4a12a,Cyp2d11,Cyp2c67,Plb1	11/151
GO Biological Processes	GO:0045088	Regulation of innate immune response	-3.46867	-0.798083	Ifi204,Klrb1a,Mmp12,Oas1g,Irf7,Gbp3,Clec7a,Rsad2,Klrb1b,Dhx58,Trim6,Ythdf2,Oasl1,Oas3,Oas1a,Ifi211,Ifi213,Ifi208,Isg15,Ifi206	20/404
GO Biological Processes	GO:0097202	Activation of cysteine-type endopeptidase activity	-3.45124	-0.793621	Ifi204,Ifi211,Ifi213,Ifi208,Ifi206	5/30
GO Biological Processes	GO:0001676	Long-chain fatty acid metabolic process	-3.40087	-0.765099	Cyp4a12b,Cyp4a14,Gstp2,Acot1,Cyp2u1,Cyp2c55,Acot2,Cyp4a12a,Cyp2d11,Cyp2c67	10/130
GO Biological Processes	GO:0002831	Regulation of response to biotic stimulus	-3.39789	-0.765099	Ifi204,Ivl,Klrb1a,Mmp12,Oas1g,Irf7,Gbp3,Clec7a,Rsad2,Spink5,Klrb1b,Dhx58,Trim6,Mmrn2,Ythdf2,Oasl1,Oas3,Oas1a,Ifi211,Ifi213,Ifi208,Isg15,Ifi206	23/504
GO Biological Processes	GO:0048252	Lauric acid metabolic process	-3.33375	-0.724434	Cyp4a12b,Cyp4a14,Cyp4a12a	3/8
GO Biological Processes	GO:0042373	Vitamin K metabolic process	-3.33375	-0.724434	Cbr1,Ubiad1,Cbr3	3/8
GO Biological Processes	GO:0043651	Linoleic acid metabolic process	-3.3159	-0.718884	Cyp4a12b,Cyp4a14,Gstp2,Cyp2c55,Cyp4a12a	5/32
GO Biological Processes	GO:0071478	Cellular response to radiation	-3.30592	-0.718884	Bax,Opn3,Ifi204,Smpd1,Stk11,Nsmce3,Pierce1,Ddias,Ifi211,Ifi213,Ifi208,Ifi206	12/184
GO Biological Processes	GO:0002218	Activation of innate immune response	-3.28977	-0.713459	Ifi204,Oas1g,Gbp3,Clec7a,Dhx58,Oas3,Oas1a,Ifi211,Ifi213,Ifi208,Ifi206	11/159
GO Biological Processes	GO:0043603	Amide metabolic process	-3.24131	-0.67546	Baat,Eif1a,St8sia3,Smpd1,Usp10,Btd,Acot1,Eif2s3x,Corin,Gal3st1,Eefsec,Mrpl46,Mtres1,Ggt6,Ehhadh,Arxes1,Cln6,Arxes2,Mrps34,Mrpl43,Gadd45gip1,Mrps2,Acot2,Acot6,Dglucy,Dhx29,Eif1ad15,Fa2h,Eif1ad7,Degs1l,Eif1ad8	31/789
GO Biological Processes	GO:0019374	Galactolipid metabolic process	-3.16441	-0.608778	Pnliprp2,Gal3st1,Fa2h	3/9
GO Biological Processes	GO:0045087	Innate immune response	-3.06747	-0.521828	Apoa4,Cyp27b1,Fcgr1,H2-Q7,Ifi204,Ifit1,Ifit2,Ifit3,Marco,Mx1,Rab20,Smpd1,Oas1g,Oasl2,Ubd,Rab11fip5,Irf7,Gbp3,Rsad2,Bst2,Dhx58,Trim6,Ythdf2,Ifi27l2b,Oasl1,Oas3,Oas1a,Ifit3b,Isg15	29/738
GO Biological Processes	GO:0071659	Negative regulation of IP-10 production	-3.01625	-0.489909	Oas1g,Oas3,Oas1a	3/10
GO Biological Processes	GO:2000342	Negative regulation of chemokine (C-X-C motif) ligand 2 production	-3.01625	-0.489909	Oas1g,Oas3,Oas1a	3/10
GO Biological Processes	GO:0034340	Response to type I interferon	-2.96368	-0.446678	Smpd1,Oas1g,Irf7,Oas1a,Isg15	5/38
GO Biological Processes	GO:0019369	Arachidonic acid metabolic process	-2.89039	-0.385781	Cyp4a12b,Cyp4a14,Cyp2u1,Cyp2c55,Cyp4a12a,Cyp2d11,Cyp2c67	7/79
GO Biological Processes	GO:0071658	Regulation of IP-10 production	-2.88468	-0.385781	Oas1g,Oas3,Oas1a	3/11
GO Biological Processes	GO:0032481	Positive regulation of type I interferon production	-2.85831	-0.368186	Mmp12,Oas1g,Irf7,Dhx58,Oas3,Oas1a,Isg15	7/80
GO Biological Processes	GO:0031349	Positive regulation of defense response	-2.84784	-0.366318	Fcgr1,Ifi204,Mmp12,Oas1g,Irf7,Gbp3,Clec7a,Rsad2,Dhx58,Trim6,Mmrn2,Lgals2,Oasl1,Oas3,Oas1a,Ifi211,Ifi213,Ifi208,Ifi206	19/421
GO Biological Processes	GO:0043392	Negative regulation of DNA binding	-2.78045	-0.307352	Ifi204,Wfikkn1,Ifi211,Ifi213,Ifi208,Ifi206	6/61
GO Biological Processes	GO:0031348	Negative regulation of defense response	-2.74031	-0.275485	Ifi204,Mmp12,Oas1g,Spink5,Klrb1b,Dhx58,Il20rb,Ythdf2,Oas3,Oas1a,Ifi211,Ifi213,Ifi208,Isg15,Ifi206	15/303
GO Biological Processes	GO:0097190	Apoptotic signaling pathway	-2.65021	-0.193509	Bax,Ifi204,Stk11,Tnfrsf10b,Tnfrsf12a,Phlda3,Rnf186,Aen,Ifi27l2a,Scn2a,Ifi27l2b,Eda2r,Ifi211,Ifi213,Ifi208,Ifi206	16/341
GO Biological Processes	GO:0019373	Epoxygenase P450 pathway	-2.62899	-0.180255	Cyp4a12b,Cyp4a14,Cyp2c55,Cyp4a12a,Cyp2c67	5/45
GO Biological Processes	GO:0006631	Fatty acid metabolic process	-2.6017	-0.160794	Baat,Cyp4a12b,Cyp4a14,Gstp2,Ucp3,Acot1,Cyp2u1,Cyp2c55,Pex13,Ehhadh,Elovl7,Acot2,Acot6,Cyp4a12a,Fa2h,Cyp2d11,Cyp2c67	17/377
GO Biological Processes	GO:0071637	Regulation of monocyte chemotactic protein-1 production	-2.59354	-0.160318	Gstp2,Oas1g,Oas3,Oas1a	4/28
GO Biological Processes	GO:0006775	Fat-soluble vitamin metabolic process	-2.53619	-0.110518	Cbr1,Cyp27b1,Ubiad1,Cbr3	4/29
GO Biological Processes	GO:0042149	Cellular response to glucose starvation	-2.50653	-0.0882855	Ifi204,Bhlha15,Ifi211,Ifi213,Ifi208,Ifi206	6/69
GO Biological Processes	GO:0070314	G1 to G0 transition	-2.47103	-0.0600839	Cyp27b1,Stk11,Wdr6	3/15
GO Biological Processes	GO:0034644	Cellular response to UV	-2.45758	-0.0538153	Bax,Opn3,Smpd1,Stk11,Nsmce3,Pierce1,Ddias	7/94
GO Biological Processes	GO:0032103	Positive regulation of response to external stimulus	-2.41871	-0.0220068	Cntf,Fcgr1,Cxcl10,Ifi204,Mmp12,Plat,Oas1g,Irf7,Gbp3,Clec7a,Rsad2,Dhx58,Trim6,Mmrn2,Lgals2,Oasl1,Oas3,Oas1a,Ifi211,Ifi213,Ifi208,Ifi206	22/564
GO Biological Processes	GO:0032787	Monocarboxylic acid metabolic process	-2.40069	-0.0189136	Aldoc,Baat,Cyp4a12b,Cyp4a14,Gstp2,Ldhb,Me1,Ucp3,Btd,Acot1,Pgam2,Cyp2u1,Cyp2c55,Pex13,Ehhadh,Elovl7,Acot2,Acot6,Cyp4a12a,Fa2h,Cyp2d11,Cyp2c67	22/566
GO Biological Processes	GO:0032728	Positive regulation of interferon-beta production	-2.38919	-0.0189136	Oas1g,Irf7,Oas3,Oas1a,Isg15	5/51
GO Biological Processes	GO:0001960	Negative regulation of cytokine-mediated signaling pathway	-2.38432	-0.0189136	Mmp12,Oas1g,Ythdf2,Oas3,Oas1a,Isg15	6/73
GO Biological Processes	GO:1905330	Regulation of morphogenesis of an epithelium	-2.38432	-0.0189136	Bmp7,Cxcl10,Lif,Fkbpl,Mmrn2,Stox1	6/73
GO Biological Processes	GO:0002683	Negative regulation of immune system process	-2.38194	-0.0189136	Foxj1,Ifi204,Mmp12,Oas1g,Bst2,Spink5,Klrb1b,Dhx58,Clec2i,Gpnmb,Bmyc,Il20rb,Ythdf2,Gpr55,Oas3,Oas1a,Ifi211,Ifi213,Ifi208,Isg15,Ifi206	21/533
GO Biological Processes	GO:0006413	Translational initiation	-2.35511	-0.00237452	Eif1a,Eif2s3x,Dhx29,Eif1ad15,Eif1ad7,Eif1ad8	6/74
GO Biological Processes	GO:0006687	Glycosphingolipid metabolic process	-2.35262	-0.00237452	Bax,St8sia3,Gal3st1,Cln6,Fa2h	5/52
GO Biological Processes	GO:0032479	Regulation of type I interferon production	-2.33028	0	Mmp12,Oas1g,Irf7,Dhx58,Oas3,Oas1a,Xaf1,Isg15	8/125
GO Biological Processes	GO:0032682	Negative regulation of chemokine production	-2.3283	0	Gstp2,Oas1g,Oas3,Oas1a	4/33
GO Biological Processes	GO:0031638	Zymogen activation	-2.2982	0	Ifi204,Plat,Ifi211,Ifi213,Ifi208,Ifi206	6/76
GO Biological Processes	GO:0060761	Negative regulation of response to cytokine stimulus	-2.27047	0	Mmp12,Oas1g,Ythdf2,Oas3,Oas1a,Isg15	6/77
GO Biological Processes	GO:0033559	Unsaturated fatty acid metabolic process	-2.26872	0	Cyp4a12b,Cyp4a14,Gstp2,Cyp2u1,Cyp2c55,Cyp4a12a,Cyp2d11,Cyp2c67	8/128
GO Biological Processes	GO:0099024	Plasma membrane invagination	-2.18213	0	Fcgr1,Marco,Clec7a,Xkr6,Spire2	5/57
GO Biological Processes	GO:0071639	Positive regulation of monocyte chemotactic protein-1 production	-2.16948	0	Oas1g,Oas3,Oas1a	3/19
GO Biological Processes	GO:0090083	Regulation of inclusion body assembly	-2.16948	0	Sacs,Bag5,Cdc34	3/19
GO Biological Processes	GO:0071479	Cellular response to ionizing radiation	-2.13859	0	Ifi204,Ddias,Ifi211,Ifi213,Ifi208,Ifi206	6/82
GO Biological Processes	GO:0046513	Ceramide biosynthetic process	-2.11914	0	St8sia3,Smpd1,Gal3st1,Fa2h,Degs1l	5/59
GO Biological Processes	GO:0051101	Regulation of DNA binding	-2.11407	0	Ifi204,Lif,Trim6,Wfikkn1,Ifi211,Ifi213,Ifi208,Ifi206	8/136
GO Biological Processes	GO:0006006	Glucose metabolic process	-2.11407	0	Aldoc,Atf3,Fbp2,Oas1g,Pdk4,Pgam2,Oas1a,Gdpgp1	8/136
GO Biological Processes	GO:1902742	Apoptotic process involved in development	-2.06748	0	Bax,Bmp7,Zpr1,Xkr6	4/39
GO Biological Processes	GO:0006690	Icosanoid metabolic process	-2.05939	0	Cyp4a12b,Cyp4a14,Gstp2,Cyp2u1,Cyp2c55,Cyp4a12a,Cyp2d11,Cyp2c67	8/139
GO Biological Processes	GO:0030858	Positive regulation of epithelial cell differentiation	-2.05881	0	Bmp7,Cyp27b1,Foxj1,Lif,Commd5	5/61
GO Biological Processes	GO:0060340	Positive regulation of type I interferon-mediated signaling pathway	-2.04529	0	Mmp12,Irf7,Trim6	3/21
GO Biological Processes	GO:0006665	Sphingolipid metabolic process	-2.04155	0	Bax,St8sia3,Smpd1,Gal3st1,Elovl7,Cln6,Fa2h,Degs1l	8/140
GO Biological Processes	GO:0071482	Cellular response to light stimulus	-2.02581	0	Bax,Opn3,Smpd1,Stk11,Nsmce3,Pierce1,Ddias	7/113
GO Biological Processes	GO:0001959	Regulation of cytokine-mediated signaling pathway	-2.0064	0	Mmp12,Oas1g,Irf7,Trim6,Ythdf2,Oas3,Oas1a,Isg15	8/142

## Sheet: Supplementary Table 10
Supplementary Table 10. GO analysis of up-regulated genes in the liver of control mice and METTL3Δhep mice (GPT) at 2 week after birth from RNA-seq data deposited in NCBI GEO under the accession number GSE198512.
Category	Term	Description	LogP	Log(q-value)	Symbols	InTerm_InList
GO Biological Processes	GO:0045333	Cellular respiration	-19.4801	-15.291	Atp5a1,Atp5b,Atp5c1,Atp5pb,Atp5k,Bax,Coq7,Cox4i1,Cox5a,Cox6a1,Cox6a2,Cox7a2,Cox8a,Mdh2,Mdh1,Ndufa2,Ndufs4,Cox7a2l,Uqcrq,Uqcrc1,Atp5o,Ndufa1,Suclg1,Ndufb5,Sdhc,Mrps36,Dnajc15,Uqcr10,Chchd5,Uqcrh,Uqcr11,Uqcrfs1,Sdhd,Ndufa6,Ndufb8,Mtln,Sdhaf4,Ndufb10,Tefm,Ndufaf1,Ndufab1,Slc25a18,Chchd10,Etfa,Ndufb6,Idh2,Ndufs6,Ndufs5	48/190
GO Biological Processes	GO:0006119	Oxidative phosphorylation	-19.0186	-15.1338	Atp5a1,Atp5b,Atp5c1,Atp5pb,Atp5k,Coq7,Cox4i1,Cox5a,Cox6a1,Cox6a2,Cox7a2,Cox8a,Ndufa2,Ndufs4,Cox7a2l,Uqcrq,Uqcrc1,Atp5o,Ndufa1,Ndufb5,Sdhc,Dnajc15,Uqcr10,Uqcrh,Uqcr11,Uqcrfs1,Sdhd,Ndufa6,Ndufb8,Ndufb10,Tefm,Ndufaf1,Ndufab1,Chchd10,Ndufb6,Ndufs6,Ndufs5	37/115
GO Biological Processes	GO:0006412	Translation	-18.8457	-15.1338	Rplp0,Eef1a1,Eef2,Eif4ebp1,Mrps33,Rack1,Eif6,Rps2,Mrpl40,Rpl19,Rpl30,Rpl32,Rpl37a,Rpl6,Rpl7,Rps12,Rps14,Rps17,Rps3a1,Rps4x,Rps5,Rps7,Rps8,Mrps12,Rpl7a,Rps11,Mrpl15,Mrpl17,Mrpl50,Mrps7,Rps28,Rplp1,Mrpl12,Mrps31,Mrps22,Mrps24,Rpl23,Eefsec,Mrpl54,Eif3f,Mrpl35,Mrps28,Mrpl11,Mrpl20,Rpl35,Mrpl51,Rpl11,Mrpl45,Mrpl46,Rps20,Mrpl57,Mtres1,Rpl4,Rps27l,Rpl41,Mrpl14,Mrps18a,Mrpl44,Yars2,Rps9,Mrps34,Mrpl16,Mrp…	72/412
GO Biological Processes	GO:0009060	Aerobic respiration	-18.2337	-14.6467	Atp5a1,Atp5b,Atp5c1,Atp5pb,Atp5k,Coq7,Cox4i1,Cox5a,Cox6a1,Cox6a2,Cox7a2,Cox8a,Mdh2,Mdh1,Ndufa2,Ndufs4,Cox7a2l,Uqcrq,Uqcrc1,Atp5o,Ndufa1,Suclg1,Ndufb5,Sdhc,Mrps36,Dnajc15,Uqcr10,Uqcrh,Uqcr11,Uqcrfs1,Sdhd,Ndufa6,Ndufb8,Ndufb10,Tefm,Ndufaf1,Ndufab1,Chchd10,Ndufb6,Idh2,Ndufs6,Ndufs5	42/156
GO Biological Processes	GO:0043603	Amide metabolic process	-17.541	-14.0509	Gla,Rplp0,Eef1a1,Eef2,Eif4ebp1,Mrps33,Glul,Rack1,Got2,Eif6,Rps2,Mrpl40,Pam,Psap,Rpl19,Rpl30,Rpl32,Rpl37a,Rpl6,Rpl7,Rps12,Rps14,Rps17,Rps3a1,Rps4x,Rps5,Rps7,Rps8,St3gal2,Smpd1,Mrps12,Btd,Cln8,Acot1,Rpl7a,Rps11,Mrpl15,Mrpl17,Mrpl50,Mrps7,Acaa2,Gal3st1,Rps28,Rplp1,Bace2,Mrpl12,Suclg1,Tdo2,Mrps31,Mrps22,Mrps24,Rpl23,Eefsec,Mrpl54,Eif3f,Mrpl35,Mrps28,Mrpl11,Mrpl20,Rpl35,Mrpl51,Rpl11,Mrpl45,Mrpl46,Rps2…	104/789
GO Biological Processes	GO:0043043	Peptide biosynthetic process	-17.4346	-14.0237	Rplp0,Eef1a1,Eef2,Eif4ebp1,Mrps33,Rack1,Eif6,Rps2,Mrpl40,Rpl19,Rpl30,Rpl32,Rpl37a,Rpl6,Rpl7,Rps12,Rps14,Rps17,Rps3a1,Rps4x,Rps5,Rps7,Rps8,Mrps12,Rpl7a,Rps11,Mrpl15,Mrpl17,Mrpl50,Mrps7,Rps28,Rplp1,Mrpl12,Mrps31,Mrps22,Mrps24,Rpl23,Eefsec,Mrpl54,Eif3f,Mrpl35,Mrps28,Mrpl11,Mrpl20,Rpl35,Mrpl51,Rpl11,Mrpl45,Mrpl46,Rps20,Mrpl57,Mtres1,Rpl4,Rps27l,Rpl41,Mrpl14,Mrps18a,Mrpl44,Yars2,Rps9,Mrps34,Mrpl16,Mrp…	72/436
GO Biological Processes	GO:0043604	Amide biosynthetic process	-17.363	-14.019	Rplp0,Eef1a1,Eef2,Eif4ebp1,Mrps33,Rack1,Eif6,Rps2,Mrpl40,Pam,Rpl19,Rpl30,Rpl32,Rpl37a,Rpl6,Rpl7,Rps12,Rps14,Rps17,Rps3a1,Rps4x,Rps5,Rps7,Rps8,St3gal2,Smpd1,Mrps12,Rpl7a,Rps11,Mrpl15,Mrpl17,Mrpl50,Mrps7,Gal3st1,Rps28,Rplp1,Mrpl12,Mrps31,Mrps22,Mrps24,Rpl23,Eefsec,Mrpl54,Eif3f,Mrpl35,Mrps28,Mrpl11,Mrpl20,Rpl35,Mrpl51,Rpl11,Mrpl45,Mrpl46,Rps20,Mrpl57,Mtres1,Rpl4,Rps27l,Rpl41,Mrpl14,Mrps18a,Mrpl44,Ya…	82/543
GO Biological Processes	GO:0015980	Energy derivation by oxidation of organic compounds	-16.2885	-13.0025	Atp5a1,Atp5b,Atp5c1,Atp5pb,Atp5k,Bax,Coq7,Cox4i1,Cox5a,Cox6a1,Cox6a2,Cox7a2,Cox8a,Lepr,Mdh2,Mdh1,Ndufa2,Ndufs4,Cox7a2l,Uqcrq,Uqcrc1,Gyg,Atp5o,Stbd1,Ndufa1,Suclg1,Ndufb5,Sdhc,Mrps36,Dnajc15,Uqcr10,Chchd5,Uqcrh,Uqcr11,Uqcrfs1,Sdhd,Ndufa6,Ndufb8,Mtln,Sdhaf4,Ndufb10,Tefm,Ndufaf1,Ndufab1,Slc25a18,Chchd10,Pygb,Etfa,Ndufb6,Idh2,Ndufs6,Ndufs5	52/260
GO Biological Processes	GO:0007005	Mitochondrion organization	-15.8532	-12.6183	Slc25a4,Slc25a5,Prdx3,Bad,Bak1,Bax,Coq7,Cox7a2,Lpin1,Hspd1,Jun,Grpel1,Grpel2,Ndufa2,Ndufs4,Nectin2,Rnf7,Cox7a2l,Tert,Timm17a,Cln8,Mrpl15,Mrpl17,Tomm70a,Timm13,Timm8a1,Timm10,Siva1,Prkn,Coa3,Acaa2,Ndufa1,Uqcc1,Timm22,Park7,Ndufb5,Chchd6,Dnajc15,Tomm7,Map1lc3a,Higd2a,Ndufa6,Ndufb8,Poldip2,Mtfp1,Tomm20,Sdhaf4,Cox19,Maip1,Apool,Sdhaf1,Ndufb10,Mul1,Ndufaf4,Tomm5,Ndufaf1,Ndufab1,Tmem70,Chchd4,Plekhf1,P…	74/487
GO Biological Processes	GO:0006091	Generation of precursor metabolites and energy	-14.6789	-11.5222	Adh5,Atp5a1,Atp5b,Atp5c1,Atp5pb,Atp5k,Bax,Coq7,Cox4i1,Cox5a,Cox6a1,Cox6a2,Cox7a2,Cox8a,Fdx1,Lepr,Mdh2,Mdh1,Ndufa2,Ndufs4,Por,Cox7a2l,Uqcrq,Uqcrc1,Gyg,Atp5o,Stbd1,Ndufa1,Suclg1,Ndufb5,Sdhc,Mrps36,Dnajc15,Uqcr10,Chchd5,Uqcrh,Uqcr11,Uqcrfs1,Sdhd,Ndufa6,Ndufb8,Mtln,Sdhaf4,Ndufb10,Tefm,Ndufaf1,Ndufab1,Slc25a18,Chchd10,Pygb,Etfa,Ndufb6,Idh2,Ndufs6,Ndufs5	55/312
GO Biological Processes	GO:0006518	Peptide metabolic process	-14.6699	-11.5222	Rplp0,Eef1a1,Eef2,Eif4ebp1,Mrps33,Rack1,Eif6,Rps2,Mrpl40,Pam,Rpl19,Rpl30,Rpl32,Rpl37a,Rpl6,Rpl7,Rps12,Rps14,Rps17,Rps3a1,Rps4x,Rps5,Rps7,Rps8,Mrps12,Rpl7a,Rps11,Mrpl15,Mrpl17,Mrpl50,Mrps7,Rps28,Rplp1,Bace2,Mrpl12,Mrps31,Mrps22,Mrps24,Rpl23,Eefsec,Mrpl54,Eif3f,Mrpl35,Mrps28,Mrpl11,Mrpl20,Rpl35,Mrpl51,Rpl11,Mrpl45,Mrpl46,Rps20,Mrpl57,Mtres1,Rpl4,Rps27l,Rpl41,Mrpl14,Mrps18a,Mrpl44,Yars2,Arxes1,Rps9,…	75/523
GO Biological Processes	GO:0032543	Mitochondrial translation	-14.3517	-11.2417	Mrps33,Mrpl40,Mrps12,Mrpl15,Mrpl17,Mrpl50,Mrps7,Mrpl12,Mrps31,Mrps22,Mrps24,Mrpl54,Mrpl35,Mrps28,Mrpl11,Mrpl20,Mrpl51,Mrpl45,Mrpl46,Mrpl57,Mrpl14,Mrps18a,Mrpl44,Yars2,Mrps34,Mrpl16,Mrpl34,Mrpl43,Mrps2,Mrps6,Tufm	31/109
GO Biological Processes	GO:0072521	Purine-containing compound metabolic process	-12.7803	-9.70517	Adssl1,Atp5a1,Atp5b,Atp5c1,Atp5pb,Atp5k,Bad,Fdx1,Gpd2,Guk1,Hint1,Mdh2,Mdh1,Nudt1,Ndufa2,Ndufs4,Nme1,Nqo1,Acot1,Atp5o,Acaa2,Ndufa1,Prdx5,Suclg1,Nme4,Tdo2,Icmt,Ndufb5,Sdhc,Dnajc30,Nudt2,Sdhd,Ola1,Ndufa6,Ndufb8,Qprt,Dcxr,Ndufb10,Ndufab1,Mpc2,Coasy,Ehhadh,Nudt9,Nudt16,Pank1,Urah,Acacb,Ppcs,Macrod1,Atic,Slc2a9,Acot2,Nudt18,Acot6,Enpp4,Atp5g3,Fitm2,Ndufb6,Urad,Idh2,Prps1l3,Ndufs6,Ndufs5	63/431
GO Biological Processes	GO:0002181	Cytoplasmic translation	-12.1063	-9.06329	Rplp0,Eif4ebp1,Rps2,Rpl19,Rpl30,Rpl32,Rpl37a,Rpl6,Rpl7,Rps12,Rps14,Rps17,Rps3a1,Rps4x,Rps5,Rps7,Rps8,Rpl7a,Rps11,Rps28,Rplp1,Rpl23,Rpl11,Rps20,Rpl4,Rpl41,Rps9,Rpl23a,Rpl32l	29/114
GO Biological Processes	GO:0006163	Purine nucleotide metabolic process	-11.8465	-8.83347	Adssl1,Atp5a1,Atp5b,Atp5c1,Atp5pb,Atp5k,Bad,Fdx1,Gpd2,Guk1,Hint1,Mdh2,Mdh1,Ndufa2,Ndufs4,Nme1,Nqo1,Acot1,Atp5o,Acaa2,Ndufa1,Prdx5,Suclg1,Nme4,Tdo2,Ndufb5,Sdhc,Dnajc30,Nudt2,Sdhd,Ola1,Ndufa6,Ndufb8,Qprt,Dcxr,Ndufb10,Ndufab1,Mpc2,Coasy,Ehhadh,Nudt9,Nudt16,Pank1,Urah,Acacb,Ppcs,Atic,Acot2,Nudt18,Acot6,Atp5g3,Fitm2,Ndufb6,Urad,Idh2,Prps1l3,Ndufs6,Ndufs5	58/396
GO Biological Processes	GO:0055086	Nucleobase-containing small molecule metabolic process	-11.6615	-8.68369	Adssl1,Atp5a1,Atp5b,Atp5c1,Atp5pb,Atp5k,Bad,Entpd2,Fdx1,Gpd2,Guk1,Hint1,Mdh2,Mdh1,Nudt1,Ndufa2,Ndufs4,Nme1,Nqo1,Umps,Acot1,Atp5o,Acaa2,Ndufa1,Prdx5,Suclg1,Nme4,Tdo2,Icmt,Park7,Dpys,Ndufb5,Sdhc,Dnajc30,Nudt2,Sdhd,Ola1,Ndufa6,Ndufb8,Qprt,Dcxr,Ndufb10,Ndufab1,Mpc2,Coasy,Ehhadh,Nudt9,Nudt16,Pank1,Urah,Enpp5,Acacb,Ppcs,Macrod1,Atic,Acot2,Nudt18,Acot6,Enpp4,Uap1l1,Atp5g3,Fitm2,Ndufb6,Urad,Idh2,Prps1l3,…	68/514
GO Biological Processes	GO:0140053	Mitochondrial gene expression	-11.6423	-8.68369	Mrps33,Mrpl40,Mrps12,Mrpl15,Mrpl17,Mrpl50,Mrps7,Mrpl12,Mrps31,Mrps22,Mrps24,Mrpl54,Mrpl35,Mrps28,Mrpl11,Mrpl20,Mrpl51,Mrpl45,Mrpl46,Mrpl57,Mrpl14,Tefm,Mrps18a,Mrpl44,Yars2,Mrps34,Mrpl16,Mrpl34,Mrpl43,Mrps2,Mrps6,Tufm	32/143
GO Biological Processes	GO:0006753	Nucleoside phosphate metabolic process	-11.5854	-8.65798	Adssl1,Atp5a1,Atp5b,Atp5c1,Atp5pb,Atp5k,Bad,Entpd2,Fdx1,Gpd2,Guk1,Hint1,Mdh2,Mdh1,Ndufa2,Ndufs4,Nme1,Nqo1,Umps,Acot1,Atp5o,Acaa2,Ndufa1,Prdx5,Suclg1,Nme4,Tdo2,Park7,Dpys,Ndufb5,Sdhc,Dnajc30,Nudt2,Sdhd,Ola1,Ndufa6,Ndufb8,Qprt,Dcxr,Ndufb10,Ndufab1,Mpc2,Coasy,Ehhadh,Nudt9,Nudt16,Pank1,Urah,Enpp5,Acacb,Ppcs,Atic,Acot2,Nudt18,Acot6,Atp5g3,Fitm2,Ndufb6,Urad,Idh2,Prps1l3,Ndufs6,Ndufs5	63/458
GO Biological Processes	GO:0009117	Nucleotide metabolic process	-11.5683	-8.65798	Adssl1,Atp5a1,Atp5b,Atp5c1,Atp5pb,Atp5k,Bad,Fdx1,Gpd2,Guk1,Hint1,Mdh2,Mdh1,Ndufa2,Ndufs4,Nme1,Nqo1,Umps,Acot1,Atp5o,Acaa2,Ndufa1,Prdx5,Suclg1,Nme4,Tdo2,Park7,Dpys,Ndufb5,Sdhc,Dnajc30,Nudt2,Sdhd,Ola1,Ndufa6,Ndufb8,Qprt,Dcxr,Ndufb10,Ndufab1,Mpc2,Coasy,Ehhadh,Nudt9,Nudt16,Pank1,Urah,Enpp5,Acacb,Ppcs,Atic,Acot2,Nudt18,Acot6,Atp5g3,Fitm2,Ndufb6,Urad,Idh2,Prps1l3,Ndufs6,Ndufs5	62/447
GO Biological Processes	GO:0022900	Electron transport chain	-10.7261	-7.83803	Coq7,Cox4i1,Cox5a,Cox6a1,Cox6a2,Cox7a2,Cox8a,Fdx1,Ndufa2,Ndufs4,Por,Cox7a2l,Uqcrq,Uqcrc1,Sdhc,Dnajc15,Uqcr10,Uqcrh,Uqcr11,Uqcrfs1,Sdhd,Ndufb8,Ndufaf1,Slc25a18,Etfa,Ndufb6,Ndufs6	27/112
GO Biological Processes	GO:0019646	Aerobic electron transport chain	-10.6036	-7.73672	Cox4i1,Cox5a,Cox6a1,Cox6a2,Cox7a2,Cox8a,Cox7a2l,Uqcrq,Uqcrc1,Sdhc,Dnajc15,Uqcr10,Uqcrh,Uqcr11,Uqcrfs1,Sdhd,Ndufb8,Ndufaf1,Ndufb6,Ndufs6	20/62
GO Biological Processes	GO:0006839	Mitochondrial transport	-10.5735	-7.72681	Slc25a4,Slc25a5,Bad,Bak1,Bax,Hspd1,Grpel1,Grpel2,Timm17a,Ucp3,Tomm70a,Timm13,Timm8a1,Timm10,Siva1,Prkn,Acaa2,Timm22,Slc25a20,Dnajc15,Tmem14c,Tomm7,Tomm20,Maip1,Mul1,Tomm5,Slc25a18,Chchd4,Plekhf1,Pmpcb,Chchd10,Ppif	32/156
GO Biological Processes	GO:0009206	Purine ribonucleoside triphosphate biosynthetic process	-10.2765	-7.44914	Atp5a1,Atp5b,Atp5c1,Atp5pb,Atp5k,Ndufa2,Ndufs4,Nme1,Atp5o,Ndufa1,Nme4,Ndufb5,Sdhc,Dnajc30,Nudt2,Sdhd,Ndufa6,Ndufb8,Ndufb10,Ndufab1,Atp5g3,Ndufb6,Ndufs6,Ndufs5	24/93
GO Biological Processes	GO:0009145	Purine nucleoside triphosphate biosynthetic process	-10.1704	-7.36155	Atp5a1,Atp5b,Atp5c1,Atp5pb,Atp5k,Ndufa2,Ndufs4,Nme1,Atp5o,Ndufa1,Nme4,Ndufb5,Sdhc,Dnajc30,Nudt2,Sdhd,Ndufa6,Ndufb8,Ndufb10,Ndufab1,Atp5g3,Ndufb6,Ndufs6,Ndufs5	24/94
GO Biological Processes	GO:0042775	Mitochondrial ATP synthesis coupled electron transport	-10.0392	-7.27599	Coq7,Cox4i1,Cox5a,Cox6a1,Cox6a2,Cox7a2,Cox8a,Cox7a2l,Uqcrq,Uqcrc1,Sdhc,Dnajc15,Uqcr10,Uqcrh,Uqcr11,Uqcrfs1,Sdhd,Ndufb8,Ndufaf1,Ndufb6,Ndufs6	21/73
GO Biological Processes	GO:0019693	Ribose phosphate metabolic process	-10.0361	-7.27599	Adssl1,Atp5a1,Atp5b,Atp5c1,Atp5pb,Atp5k,Bad,Guk1,Hint1,Ndufa2,Ndufs4,Nme1,Umps,Acot1,Atp5o,Acaa2,Ndufa1,Suclg1,Nme4,Tdo2,Dpys,Ndufb5,Sdhc,Dnajc30,Nudt2,Sdhd,Ola1,Ndufa6,Ndufb8,Ndufb10,Ndufab1,Mpc2,Coasy,Ehhadh,Nudt9,Pank1,Urah,Acacb,Ppcs,Atic,Acot2,Nudt18,Acot6,Atp5g3,Fitm2,Ndufb6,Urad,Prps1l3,Ndufs6,Ndufs5	50/347
GO Biological Processes	GO:0009259	Ribonucleotide metabolic process	-10.0337	-7.27599	Adssl1,Atp5a1,Atp5b,Atp5c1,Atp5pb,Atp5k,Bad,Guk1,Hint1,Ndufa2,Ndufs4,Nme1,Umps,Acot1,Atp5o,Acaa2,Ndufa1,Suclg1,Nme4,Tdo2,Dpys,Ndufb5,Sdhc,Dnajc30,Nudt2,Sdhd,Ola1,Ndufa6,Ndufb8,Ndufb10,Ndufab1,Mpc2,Coasy,Ehhadh,Nudt9,Pank1,Urah,Acacb,Ppcs,Atic,Acot2,Nudt18,Acot6,Atp5g3,Fitm2,Ndufb6,Urad,Ndufs6,Ndufs5	49/336
GO Biological Processes	GO:0015986	Proton motive force-driven ATP synthesis	-9.91379	-7.17185	Atp5a1,Atp5b,Atp5c1,Atp5pb,Atp5k,Ndufa2,Ndufs4,Atp5o,Ndufa1,Ndufb5,Sdhc,Sdhd,Ndufa6,Ndufb8,Ndufb10,Ndufab1,Atp5g3,Ndufb6,Ndufs6,Ndufs5	20/67
GO Biological Processes	GO:0009150	Purine ribonucleotide metabolic process	-9.89733	-7.17063	Adssl1,Atp5a1,Atp5b,Atp5c1,Atp5pb,Atp5k,Bad,Guk1,Hint1,Ndufa2,Ndufs4,Nme1,Acot1,Atp5o,Acaa2,Ndufa1,Suclg1,Nme4,Tdo2,Ndufb5,Sdhc,Dnajc30,Nudt2,Sdhd,Ola1,Ndufa6,Ndufb8,Ndufb10,Ndufab1,Mpc2,Coasy,Ehhadh,Nudt9,Pank1,Urah,Acacb,Ppcs,Atic,Acot2,Nudt18,Acot6,Atp5g3,Fitm2,Ndufb6,Urad,Ndufs6,Ndufs5	47/317
GO Biological Processes	GO:0006754	ATP biosynthetic process	-9.83214	-7.12016	Atp5a1,Atp5b,Atp5c1,Atp5pb,Atp5k,Ndufa2,Ndufs4,Atp5o,Ndufa1,Ndufb5,Sdhc,Dnajc30,Nudt2,Sdhd,Ndufa6,Ndufb8,Ndufb10,Ndufab1,Atp5g3,Ndufb6,Ndufs6,Ndufs5	22/82
GO Biological Processes	GO:0042773	ATP synthesis coupled electron transport	-9.79529	-7.09756	Coq7,Cox4i1,Cox5a,Cox6a1,Cox6a2,Cox7a2,Cox8a,Cox7a2l,Uqcrq,Uqcrc1,Sdhc,Dnajc15,Uqcr10,Uqcrh,Uqcr11,Uqcrfs1,Sdhd,Ndufb8,Ndufaf1,Ndufb6,Ndufs6	21/75
GO Biological Processes	GO:0032787	Monocarboxylic acid metabolic process	-9.76958	-7.09082	Acads,Adh5,Aldoc,Cpt2,Crat,Cyp2e1,Cyp3a11,Cyp4a10,Cyp4a14,Dbi,Eci1,Eno1,Ephx1,Ces1c,Fabp2,Lpin1,Galk1,Gpx1,Gstm1,Gstm4,Gstp2,Gstp1,Mif,Pam,Pgam1,Pgk1,Lypla1,Por,Tpi1,Ucp3,Btd,Decr2,Slc27a4,Acot1,Ech1,Acaa2,Park7,Fads3,Aig1,Ptgr1,Abhd5,Dcxr,Mtln,Ndufab1,Mpc2,Pex13,Chst14,Ehhadh,Elovl7,Aacs,Acox2,Acacb,Glo1,Etfa,Acot2,Acot6,Ces2e,Acsf3,Idh2,Mthfd1l,Cyp4a12a,Fa2h,Ugt1a6b,Peds1,Ndufs6,Cyp2d11,Gpx4,Cy…	68/566
GO Biological Processes	GO:0009201	Ribonucleoside triphosphate biosynthetic process	-9.76141	-7.09082	Atp5a1,Atp5b,Atp5c1,Atp5pb,Atp5k,Ndufa2,Ndufs4,Nme1,Atp5o,Ndufa1,Nme4,Ndufb5,Sdhc,Dnajc30,Nudt2,Sdhd,Ndufa6,Ndufb8,Ndufb10,Ndufab1,Atp5g3,Ndufb6,Ndufs6,Ndufs5	24/98
GO Biological Processes	GO:0006631	Fatty acid metabolic process	-9.70731	-7.04969	Acads,Adh5,Cpt2,Crat,Cyp2e1,Cyp4a10,Cyp4a14,Dbi,Eci1,Ephx1,Ces1c,Fabp2,Lpin1,Gpx1,Gstm1,Gstm4,Gstp2,Gstp1,Mif,Pam,Lypla1,Por,Ucp3,Decr2,Slc27a4,Acot1,Ech1,Acaa2,Fads3,Aig1,Ptgr1,Abhd5,Mtln,Ndufab1,Pex13,Ehhadh,Elovl7,Aacs,Acox2,Acacb,Etfa,Acot2,Acot6,Ces2e,Acsf3,Cyp4a12a,Fa2h,Peds1,Ndufs6,Cyp2d11,Gpx4,Cyp4a32	52/377
GO Biological Processes	GO:0042776	Proton motive force-driven mitochondrial ATP synthesis	-9.67008	-7.02505	Atp5a1,Atp5b,Atp5c1,Atp5pb,Atp5k,Ndufa2,Ndufs4,Atp5o,Ndufa1,Ndufb5,Sdhc,Sdhd,Ndufa6,Ndufb8,Ndufb10,Ndufab1,Ndufb6,Ndufs6,Ndufs5	19/62
GO Biological Processes	GO:0006164	Purine nucleotide biosynthetic process	-9.605	-6.97221	Adssl1,Atp5a1,Atp5b,Atp5c1,Atp5pb,Atp5k,Guk1,Ndufa2,Ndufs4,Nme1,Atp5o,Ndufa1,Nme4,Ndufb5,Sdhc,Dnajc30,Nudt2,Sdhd,Ndufa6,Ndufb8,Qprt,Ndufb10,Ndufab1,Mpc2,Coasy,Pank1,Acacb,Ppcs,Atic,Atp5g3,Ndufb6,Idh2,Prps1l3,Ndufs6,Ndufs5	35/198
GO Biological Processes	GO:0022904	Respiratory electron transport chain	-9.56555	-6.94465	Coq7,Cox4i1,Cox5a,Cox6a1,Cox6a2,Cox7a2,Cox8a,Ndufs4,Cox7a2l,Uqcrq,Uqcrc1,Sdhc,Dnajc15,Uqcr10,Uqcrh,Uqcr11,Uqcrfs1,Sdhd,Ndufb8,Ndufaf1,Slc25a18,Etfa,Ndufb6,Ndufs6	24/100
GO Biological Processes	GO:0009152	Purine ribonucleotide biosynthetic process	-9.42184	-6.81252	Adssl1,Atp5a1,Atp5b,Atp5c1,Atp5pb,Atp5k,Guk1,Ndufa2,Ndufs4,Nme1,Atp5o,Ndufa1,Nme4,Ndufb5,Sdhc,Dnajc30,Nudt2,Sdhd,Ndufa6,Ndufb8,Ndufb10,Ndufab1,Mpc2,Coasy,Pank1,Acacb,Ppcs,Atic,Atp5g3,Ndufb6,Ndufs6,Ndufs5	32/172
GO Biological Processes	GO:0046390	Ribose phosphate biosynthetic process	-9.30886	-6.71083	Adssl1,Atp5a1,Atp5b,Atp5c1,Atp5pb,Atp5k,Guk1,Ndufa2,Ndufs4,Nme1,Umps,Atp5o,Ndufa1,Nme4,Ndufb5,Sdhc,Dnajc30,Nudt2,Sdhd,Ndufa6,Ndufb8,Ndufb10,Ndufab1,Mpc2,Coasy,Pank1,Acacb,Ppcs,Atic,Atp5g3,Ndufb6,Prps1l3,Ndufs6,Ndufs5	34/193
GO Biological Processes	GO:0009260	Ribonucleotide biosynthetic process	-9.26301	-6.67597	Adssl1,Atp5a1,Atp5b,Atp5c1,Atp5pb,Atp5k,Guk1,Ndufa2,Ndufs4,Nme1,Umps,Atp5o,Ndufa1,Nme4,Ndufb5,Sdhc,Dnajc30,Nudt2,Sdhd,Ndufa6,Ndufb8,Ndufb10,Ndufab1,Mpc2,Coasy,Pank1,Acacb,Ppcs,Atic,Atp5g3,Ndufb6,Ndufs6,Ndufs5	33/184
GO Biological Processes	GO:0072522	Purine-containing compound biosynthetic process	-9.12226	-6.54595	Adssl1,Atp5a1,Atp5b,Atp5c1,Atp5pb,Atp5k,Guk1,Ndufa2,Ndufs4,Nme1,Atp5o,Ndufa1,Nme4,Ndufb5,Sdhc,Dnajc30,Nudt2,Sdhd,Ndufa6,Ndufb8,Qprt,Ndufb10,Ndufab1,Mpc2,Coasy,Pank1,Acacb,Ppcs,Atic,Atp5g3,Ndufb6,Idh2,Prps1l3,Ndufs6,Ndufs5	35/206
GO Biological Processes	GO:0009142	Nucleoside triphosphate biosynthetic process	-8.83395	-6.26811	Atp5a1,Atp5b,Atp5c1,Atp5pb,Atp5k,Ndufa2,Ndufs4,Nme1,Atp5o,Ndufa1,Nme4,Ndufb5,Sdhc,Dnajc30,Nudt2,Sdhd,Ndufa6,Ndufb8,Ndufb10,Ndufab1,Atp5g3,Ndufb6,Ndufs6,Ndufs5	24/108
GO Biological Processes	GO:0046034	ATP metabolic process	-8.71367	-6.15804	Atp5a1,Atp5b,Atp5c1,Atp5pb,Atp5k,Bad,Guk1,Ndufa2,Ndufs4,Atp5o,Ndufa1,Ndufb5,Sdhc,Dnajc30,Nudt2,Sdhd,Ola1,Ndufa6,Ndufb8,Ndufb10,Ndufab1,Atp5g3,Ndufb6,Ndufs6,Ndufs5	25/118
GO Biological Processes	GO:0009144	Purine nucleoside triphosphate metabolic process	-8.49759	-5.95194	Atp5a1,Atp5b,Atp5c1,Atp5pb,Atp5k,Bad,Guk1,Ndufa2,Ndufs4,Nme1,Atp5o,Ndufa1,Nme4,Ndufb5,Sdhc,Dnajc30,Nudt2,Sdhd,Ola1,Ndufa6,Ndufb8,Ndufb10,Ndufab1,Nudt16,Atp5g3,Ndufb6,Ndufs6,Ndufs5	28/148
GO Biological Processes	GO:0009165	Nucleotide biosynthetic process	-8.36727	-5.83138	Adssl1,Atp5a1,Atp5b,Atp5c1,Atp5pb,Atp5k,Guk1,Ndufa2,Ndufs4,Nme1,Umps,Atp5o,Ndufa1,Nme4,Ndufb5,Sdhc,Dnajc30,Nudt2,Sdhd,Ndufa6,Ndufb8,Qprt,Ndufb10,Ndufab1,Mpc2,Coasy,Pank1,Acacb,Ppcs,Atic,Atp5g3,Ndufb6,Idh2,Prps1l3,Ndufs6,Ndufs5	36/230
GO Biological Processes	GO:0009205	Purine ribonucleoside triphosphate metabolic process	-8.26727	-5.74093	Atp5a1,Atp5b,Atp5c1,Atp5pb,Atp5k,Bad,Guk1,Ndufa2,Ndufs4,Nme1,Atp5o,Ndufa1,Nme4,Ndufb5,Sdhc,Dnajc30,Nudt2,Sdhd,Ola1,Ndufa6,Ndufb8,Ndufb10,Ndufab1,Atp5g3,Ndufb6,Ndufs6,Ndufs5	27/142
GO Biological Processes	GO:1901293	Nucleoside phosphate biosynthetic process	-8.06338	-5.54638	Adssl1,Atp5a1,Atp5b,Atp5c1,Atp5pb,Atp5k,Guk1,Ndufa2,Ndufs4,Nme1,Umps,Atp5o,Ndufa1,Nme4,Ndufb5,Sdhc,Dnajc30,Nudt2,Sdhd,Ndufa6,Ndufb8,Qprt,Ndufb10,Ndufab1,Mpc2,Coasy,Pank1,Acacb,Ppcs,Atic,Atp5g3,Ndufb6,Idh2,Prps1l3,Ndufs6,Ndufs5	36/236
GO Biological Processes	GO:0070585	Protein localization to mitochondrion	-7.92246	-5.41461	Bax,Tspo,Hspd1,Grpel1,Grpel2,Timm17a,Tomm70a,Timm13,Timm8a1,Timm10,Prkn,Timm22,Dnajc15,Tomm7,Rnf186,Tomm20,Maip1,Tomm5,Chchd4,Pmpcb	20/85
GO Biological Processes	GO:0140241	Translation at synapse	-7.89662	-5.40649	Eef2,Rpl32,Rpl37a,Rpl6,Rpl7,Rps12,Rps14,Rps5,Rpl7a,Rps11,Rps28,Rpl23,Rpl35,Rpl4,Rpl23a	15/48
GO Biological Processes	GO:0140242	Translation at postsynapse	-7.89662	-5.40649	Eef2,Rpl32,Rpl37a,Rpl6,Rpl7,Rps12,Rps14,Rps5,Rpl7a,Rps11,Rps28,Rpl23,Rpl35,Rpl4,Rpl23a	15/48
GO Biological Processes	GO:0009199	Ribonucleoside triphosphate metabolic process	-7.79933	-5.3178	Atp5a1,Atp5b,Atp5c1,Atp5pb,Atp5k,Bad,Guk1,Ndufa2,Ndufs4,Nme1,Atp5o,Ndufa1,Nme4,Ndufb5,Sdhc,Dnajc30,Nudt2,Sdhd,Ola1,Ndufa6,Ndufb8,Ndufb10,Ndufab1,Atp5g3,Ndufb6,Ndufs6,Ndufs5	27/149
GO Biological Processes	GO:0042254	Ribosome biogenesis	-7.77429	-5.30119	Rplp0,C1qbp,Glul,Eif6,Rpl6,Rpl7,Rps12,Rps14,Rps17,Rps3a1,Rps5,Rps7,Rps8,Rpl7a,Rps11,Nop16,Abt1,Mrps7,Nhp2,Bysl,Rps28,Rrs1,Nop10,Rpl7l1,Mrpl20,Rpl35,2810004N23Rik,Rpl11,Mrm3,Wdr55,Rps27l,Zfp593,Mrpl44,Riox1,Ddx28,Pop7,Rps9,Rpusd1,Mrps2,Rpl23a,Urb2,Rps27rt	42/309
GO Biological Processes	GO:0009141	Nucleoside triphosphate metabolic process	-7.36119	-4.89637	Atp5a1,Atp5b,Atp5c1,Atp5pb,Atp5k,Bad,Guk1,Ndufa2,Ndufs4,Nme1,Atp5o,Ndufa1,Nme4,Ndufb5,Sdhc,Dnajc30,Nudt2,Sdhd,Ola1,Ndufa6,Ndufb8,Ndufb10,Ndufab1,Nudt16,Atp5g3,Ndufb6,Ndufs6,Ndufs5	28/166
GO Biological Processes	GO:0007006	Mitochondrial membrane organization	-7.34402	-4.88891	Slc25a4,Slc25a5,Bad,Bak1,Bax,Cln8,Tomm70a,Timm13,Timm10,Siva1,Acaa2,Timm22,Chchd6,Mtfp1,Maip1,Apool,Mul1,Plekhf1,Chchd10,Ppif,Tmem11,Micos13	22/109
GO Biological Processes	GO:0072655	Establishment of protein localization to mitochondrion	-7.33765	-4.88891	Bax,Tspo,Hspd1,Grpel1,Grpel2,Timm17a,Tomm70a,Timm13,Timm8a1,Timm10,Timm22,Dnajc15,Tomm7,Tomm20,Maip1,Tomm5,Chchd4,Pmpcb	18/75
GO Biological Processes	GO:0033108	Mitochondrial respiratory chain complex assembly	-7.19675	-4.75584	Ndufa2,Ndufs4,Coa3,Ndufa1,Uqcc1,Ndufb5,Ndufa6,Ndufb8,Sdhaf4,Cox19,Sdhaf1,Ndufb10,Ndufaf4,Ndufaf1,Ndufab1,Chchd4,Ndufaf2,Lyrm2,Ndufb6,Ndufs6,Ndufs5	21/102
GO Biological Processes	GO:0140236	Translation at presynapse	-7.11472	-4.6815	Rpl32,Rpl37a,Rpl6,Rpl7,Rps12,Rps14,Rps5,Rpl7a,Rps11,Rps28,Rpl23,Rpl35,Rpl4,Rpl23a	14/47
GO Biological Processes	GO:0042255	Ribosome assembly	-6.75647	-4.3308	Rplp0,C1qbp,Eif6,Rpl6,Rps14,Rps5,Abt1,Mrps7,Rps28,Rrs1,Mrpl20,Rpl11,Rps27l,Ddx28,Mrps2,Rpl23a	16/65
GO Biological Processes	GO:0006626	Protein targeting to mitochondrion	-6.46781	-4.04957	Hspd1,Grpel1,Grpel2,Timm17a,Tomm70a,Timm13,Timm8a1,Timm10,Timm22,Dnajc15,Tomm7,Tomm20,Tomm5,Chchd4,Pmpcb	15/60
GO Biological Processes	GO:0022613	Ribonucleoprotein complex biogenesis	-6.35598	-3.94504	Rplp0,C1qbp,Coil,Glul,Eif6,Rpl6,Rpl7,Rps12,Rps14,Rps17,Rps3a1,Rps5,Rps7,Rps8,Snrpc,Rpl7a,Rps11,Nop16,Abt1,Mrps7,Nhp2,Bysl,Rps28,Ruvbl1,Rrs1,Nop10,Rpl7l1,Mrpl20,Rpl35,2810004N23Rik,Rpl11,Gemin6,Snrpd3,Mrm3,Wdr55,Rps27l,Zfp593,Mrpl44,Gemin7,Riox1,Ddx28,Pop7,Rps9,Rpusd1,Mrps2,Rpl23a,Urb2,Rps27rt	48/422
GO Biological Processes	GO:0010257	NADH dehydrogenase complex assembly	-6.17133	-3.77462	Ndufa2,Ndufs4,Ndufa1,Ndufb5,Ndufa6,Ndufb8,Ndufb10,Ndufaf4,Ndufaf1,Ndufab1,Ndufaf2,Lyrm2,Ndufb6,Ndufs6,Ndufs5	15/63
GO Biological Processes	GO:0032981	Mitochondrial respiratory chain complex I assembly	-6.17133	-3.77462	Ndufa2,Ndufs4,Ndufa1,Ndufb5,Ndufa6,Ndufb8,Ndufb10,Ndufaf4,Ndufaf1,Ndufab1,Ndufaf2,Lyrm2,Ndufb6,Ndufs6,Ndufs5	15/63
GO Biological Processes	GO:0044743	Protein transmembrane import into intracellular organelle	-5.57897	-3.18921	Hspd1,Grpel1,Grpel2,Timm17a,Tomm70a,Pex14,Dnajc15,Tomm7,Tomm20,Pex13,Chchd4	11/38
GO Biological Processes	GO:0043086	Negative regulation of catalytic activity	-5.48361	-3.10069	Gla,Ahsg,Anxa8,Prdx3,Apoe,Serpinc1,Bmp7,Serpina6,Cdkn1a,Cst3,Cstb,Ctsb,Lpin1,Bscl2,Gpc3,Gpx1,Grn,Gstp2,Gstp1,Serpind1,Hras,Itgb1bp1,Lepr,Smad7,Nqo1,Prkca,Por,Ppp1r1b,Rps7,Apcs,Serpinf1,Smpd1,Timp2,Pebp1,Slc27a4,Cln8,Prkn,Prdx5,Park7,Angptl4,Rpl23,Serpinb1a,Gskip,Plin5,Rpl11,Lamtor5,Tmed10,Bag5,Hexim2,Wfdc3,Camk2n2,Rd3,Mvp,Cblc,Dnaja3,Sh3bp4,Acacb,Dusp22,Egln1,Chmp6,Itih5,Bag2,Serpina10,Zgpat	64/672
GO Biological Processes	GO:0007007	Inner mitochondrial membrane organization	-5.45781	-3.08657	Bax,Tomm70a,Timm13,Timm10,Timm22,Chchd6,Maip1,Apool,Tmem11,Micos13	10/32
GO Biological Processes	GO:1990542	Mitochondrial transmembrane transport	-5.45612	-3.08657	Hspd1,Grpel1,Grpel2,Timm17a,Ucp3,Tomm70a,Dnajc15,Tomm7,Tomm20,Slc25a18,Chchd4	11/39
GO Biological Processes	GO:0044282	Small molecule catabolic process	-5.44649	-3.08347	Acads,Adh5,Apoe,Bad,Glb1,Cpt2,Crat,Eci1,Eno1,Lpin1,Galk1,Got2,Nudt1,Pgk1,Tpi1,Decr2,Slc27a4,Acaa2,Tdo2,Park7,Aig1,Qprt,Dcxr,Mtln,Pex13,Ehhadh,Urah,Acox2,Glo1,Cbr3,Etfa,Acot2,Enpp4,Urad,Amdhd2,Acsf3,Acmsd,Galm	38/325
GO Biological Processes	GO:0090407	Organophosphate biosynthetic process	-5.35616	-2.99957	Adssl1,Atp5a1,Atp5b,Atp5c1,Atp5pb,Atp5k,Guk1,Ndufa2,Ndufs4,Nme1,Tpi1,Umps,Bpnt1,Atp5o,Ndufa1,Nme4,Ndufb5,Sdhc,Dnajc30,Nudt2,Pyurf,Sdhd,Pgap4,Ndufa6,Ndufb8,Qprt,Abhd5,Dcxr,Ndufb10,Fitm1,Mocs3,Ndufab1,Mpc2,Coasy,Sgms2,Pank1,Acacb,Pnpo,Ppcs,Atic,Pigh,Plaat3,Atp5g3,Fitm2,Ndufb6,Idh2,Prps1l3,Ndufs6,Ndufs5	49/471
GO Biological Processes	GO:0006094	Gluconeogenesis	-5.29408	-2.94383	Aldoc,Eno1,Fbp2,Gpd2,Lepr,Mdh2,Mdh1,Pgam1,Pgk1,Rbp4,Tpi1,C1qtnf12	12/48
GO Biological Processes	GO:0016042	Lipid catabolic process	-5.0957	-2.7517	Acads,Gla,Apoa4,Apoe,Cpt2,Crat,Eci1,Ces1c,Lpin1,Bscl2,Ppt1,Psap,Smpd1,Decr2,Slc27a4,Acaa2,Apoa5,Aig1,Pla2g12a,Plbd1,Iah1,Mtln,Pex13,Ehhadh,Srd5a1,Acox2,Etfa,Hsd17b11,Acot2,Plaat3,Fitm2,Apob,Nceh1,Plb1	34/286
GO Biological Processes	GO:0044283	Small molecule biosynthetic process	-4.90748	-2.5753	Aldoc,Coq7,Cyp4a10,Cyp4a14,Eno1,Ephx1,Ces1c,Fbp2,Gpd2,Glul,Got2,Gstm1,Gstm4,Gstp2,Gstp1,Hsd17b7,Lepr,Mif,Mdh2,Mdh1,Pgam1,Pgk1,Rbp4,Spr,Tpi1,Decr2,Park7,Fads3,Pgp,C1qtnf12,Ndufab1,Ubiad1,Chst14,Elovl7,Acox2,Acacb,Pnpo,Cth,Npc1l1,Acsf3,Mthfd1l,Cyp4a12a,Bhmt1b,Fa2h,Cyp4a32	45/435
GO Biological Processes	GO:0019319	Hexose biosynthetic process	-4.90707	-2.5753	Aldoc,Eno1,Fbp2,Gpd2,Lepr,Mdh2,Mdh1,Pgam1,Pgk1,Rbp4,Tpi1,C1qtnf12	12/52
GO Biological Processes	GO:0042159	Lipoprotein catabolic process	-4.87358	-2.54781	Apoe,Ctsd,Lypla1,Ppt1,Abhd13,Abhd17c,Apob	7/17
GO Biological Processes	GO:0006790	Sulfur compound metabolic process	-4.72656	-2.4067	Ext2,Gstm1,Gstp2,Gstp1,Hspa9,Hyal1,Tpst2,Btd,Acot1,Galns,Acaa2,Suclg1,Tdo2,Icmt,Sult1c2,Ndufab1,Mpc2,Sulf2,Chst14,Glrx5,Ehhadh,Glce,Acacb,Ppcs,Cth,Acot2,Suox,Iba57,Acot6,Fitm2,Mat2a,Mpst,Bhmt1b	33/285
GO Biological Processes	GO:0046364	Monosaccharide biosynthetic process	-4.70297	-2.38894	Aldoc,Eno1,Fbp2,Gpd2,Lepr,Mdh2,Mdh1,Pgam1,Pgk1,Rbp4,Tpi1,C1qtnf12,Chst14	13/63
GO Biological Processes	GO:0006122	Mitochondrial electron transport, ubiquinol to cytochrome c	-4.58326	-2.28065	Uqcrq,Uqcrc1,Uqcr10,Uqcrh,Uqcr11,Uqcrfs1	6/13
GO Biological Processes	GO:0007042	Lysosomal lumen acidification	-4.58326	-2.28065	Atp6v0c,Grn,Ppt1,Tmem9,Cln6,Creg1	6/13
GO Biological Processes	GO:0042274	Ribosomal small subunit biogenesis	-4.53866	-2.24166	Rps12,Rps14,Rps17,Rps3a1,Rps5,Rps7,Rps8,Rps11,Abt1,Mrps7,Bysl,Rps28,Rrs1,2810004N23Rik,Rps27l,Rps9,Rps27rt	17/104
GO Biological Processes	GO:0090559	Regulation of membrane permeability	-4.49816	-2.20669	Slc25a4,Slc25a5,Bad,Bak1,Bax,Cldn3,F11r,Siva1,Acaa2,Mul1,Plekhf1,Chchd10,Ppif,Laptm4b	14/75
GO Biological Processes	GO:0019318	Hexose metabolic process	-4.47661	-2.19061	Aldoc,Bad,Glb1,Eno1,Fbp2,Gpd2,Galk1,Onecut1,Lepr,Mdh2,Mdh1,Pgam1,Pgk1,Rbp4,Tpi1,Pdk4,Fuca2,C1qtnf12,Dcxr,Fuom,Galk2,Gdpgp1,Galm	23/171
GO Biological Processes	GO:0065002	Intracellular protein transmembrane transport	-4.39816	-2.11755	Hspd1,Grpel1,Grpel2,Timm17a,Tomm70a,Pex14,Dnajc15,Tomm7,Sec61b,Tomm20,Pex13,Chchd4	12/58
GO Biological Processes	GO:0010890	Positive regulation of sequestering of triglyceride	-4.37495	-2.09966	Plin2,Plin3,Plin5,Fitm1,Fitm2	5/9
GO Biological Processes	GO:0030150	Protein import into mitochondrial matrix	-4.33356	-2.06875	Grpel1,Grpel2,Timm17a,Tomm70a,Dnajc15,Tomm7,Tomm20	7/20
GO Biological Processes	GO:0006123	Mitochondrial electron transport, cytochrome c to oxygen	-4.33356	-2.06875	Cox4i1,Cox5a,Cox6a1,Cox6a2,Cox7a2,Cox8a,Cox7a2l	7/20
GO Biological Processes	GO:1901615	Organic hydroxy compound metabolic process	-4.3095	-2.04982	Adh5,Alpl,Apoa4,Apoe,Ctsb,Ctsl,Cyp2e1,Ddt,Ephx1,Ces1c,Fdx1,Galk1,Hsd17b7,Lepr,Maoa,Ndufs4,Nqo1,Med1,Rbp4,Smpd1,Soat1,Spr,Tg,Tpi1,Cln8,Apon,Prkn,Gde1,Park7,Pgp,Retsat,Npc2,Ebpl,Slc16a10,Cln6,Acox2,Pnpo,Rdh14,Glo1,Btbd9,Npc1l1,Apob,Tsku,Idh2,Plb1	45/460
GO Biological Processes	GO:1901137	Carbohydrate derivative biosynthetic process	-4.29245	-2.04761	Adssl1,Atp5a1,Atp5b,Atp5c1,Atp5pb,Atp5k,Ext2,Guk1,Hyal1,Ndufa2,Ndufs4,Nme1,St3gal2,Tpi1,Umps,Atp5o,Gal3st1,Ndufa1,Nme4,Ndufb5,Sdhc,Dnajc30,Nudt2,Pyurf,Sdhd,Pgap4,Ndufa6,Ndufb8,Dcxr,Ndufb10,Ndufab1,Mpc2,Coasy,Chst14,Pank1,Glce,Acacb,Ppcs,Atic,B4gat1,Pigh,Uap1l1,Atp5g3,Slc35c1,Ndufb6,Fktn,Prps1l3,Lcmt2,Fa2h,Ndufs6,Ndufs5	51/545
GO Biological Processes	GO:0009062	Fatty acid catabolic process	-4.29223	-2.04761	Acads,Cpt2,Crat,Eci1,Lpin1,Decr2,Slc27a4,Acaa2,Aig1,Mtln,Pex13,Ehhadh,Acox2,Etfa,Acot2	15/88
GO Biological Processes	GO:0010889	Regulation of sequestering of triglyceride	-4.15795	-1.93734	Plin2,Plin3,Plin5,Abhd5,Fitm1,Fitm2	6/15
GO Biological Processes	GO:0071806	Protein transmembrane transport	-4.02754	-1.81157	Hspd1,Grpel1,Grpel2,Timm17a,Tomm70a,Pex14,Dnajc15,Tomm7,Sec61b,Tomm20,Pex13,Chchd4	12/63
GO Biological Processes	GO:0005996	Monosaccharide metabolic process	-3.87856	-1.67174	Aldoc,Bad,Glb1,Eno1,Fbp2,Gpd2,Galk1,Onecut1,Lepr,Mdh2,Mdh1,Pgam1,Pgk1,Rbp4,Tpi1,Pdk4,Fuca2,C1qtnf12,Dcxr,Fuom,Galk2,Chst14,Gdpgp1,Galm	24/199
GO Biological Processes	GO:0008202	Steroid metabolic process	-3.76935	-1.57148	Afp,Apoa4,Apoe,Tspo,Serpina6,Cbr1,Cyp17a1,Cyp2e1,Cyp3a11,Ces1c,Fdx1,Hsd17b7,Lepr,Med1,Smpd1,Soat1,Cln8,Akr1c13,Apon,Hsd17b12,Npc2,Ebpl,Cln6,Srd5a1,Acox2,Hsd17b11,Npc1l1,Apob,Tsku,Akr1c12	30/279
GO Biological Processes	GO:0044242	Cellular lipid catabolic process	-3.69894	-1.51235	Acads,Gla,Cpt2,Crat,Eci1,Lpin1,Bscl2,Psap,Smpd1,Decr2,Slc27a4,Acaa2,Apoa5,Aig1,Plbd1,Mtln,Pex13,Ehhadh,Acox2,Etfa,Acot2,Apob,Plb1	23/192
GO Biological Processes	GO:0016051	Carbohydrate biosynthetic process	-3.69713	-1.51235	Aldoc,Eno1,Ext2,Fbp2,Gpd2,Lepr,Mdh2,Mdh1,Pgam1,Pgk1,Rbp4,St3gal2,Tpi1,Gyg,Pgp,C1qtnf12,Chst14	17/121
GO Biological Processes	GO:1901028	Regulation of mitochondrial outer membrane permeabilization involved in apoptotic signaling pathway	-3.64164	-1.46538	Slc25a4,Slc25a5,Bak1,Siva1,Acaa2,Mul1,Chchd10	7/25
GO Biological Processes	GO:0010884	Positive regulation of lipid storage	-3.64164	-1.46538	Plin2,Plin3,Plin5,Fitm1,Acacb,Fitm2,Apob	7/25
GO Biological Processes	GO:0030162	Regulation of proteolysis	-3.56881	-1.40091	Ahsg,Anxa8,Apoe,Serpinc1,Bad,Bak1,Bax,Serpina6,Cldn3,Cldn4,Clu,Cradd,Cst3,Cstb,Ctsb,Ctsd,Ctsl,Eno1,F2,Fadd,Gna12,Rack1,Gpc3,Gpx1,Grn,Serpind1,Hspd1,Smad7,Mgmt,Nedd8,Por,Rnf7,Rps7,Serpinf1,Glg1,Timm17a,Timp2,Ubb,Pebp1,Prkn,Cpb2,Park7,Rpl23,Serpinb1a,Rpl11,Rps27l,Mul1,Lamtor5,Tmed10,Svbp,Trim32,Fam162a,Bag5,Wfdc3,Cln6,Dnaja3,Tmem98,Rnf185,Itih5,Bag2,Serpina10,Trim67,Nlrp12,Zyg11b	64/778
GO Biological Processes	GO:0019915	Lipid storage	-3.55658	-1.39715	Plin2,Apoe,Cidec,Bscl2,Soat1,Plin3,Plin5,Npc2,Fitm1,Fitm2	10/51
GO Biological Processes	GO:0006006	Glucose metabolic process	-3.54882	-1.39715	Aldoc,Bad,Eno1,Fbp2,Gpd2,Onecut1,Lepr,Mdh2,Mdh1,Pgam1,Pgk1,Rbp4,Tpi1,Pdk4,C1qtnf12,Dcxr,Gdpgp1,Galm	18/136
GO Biological Processes	GO:0000027	Ribosomal large subunit assembly	-3.52547	-1.37777	Rplp0,Rpl6,Rrs1,Mrpl20,Rpl11,Ddx28,Rpl23a	7/26
GO Biological Processes	GO:0042273	Ribosomal large subunit biogenesis	-3.51465	-1.37099	Rplp0,Eif6,Rpl6,Rpl7,Nop16,Rrs1,Rpl7l1,Mrpl20,Rpl35,Rpl11,Ddx28,Rpl23a	12/71
GO Biological Processes	GO:0046902	Regulation of mitochondrial membrane permeability	-3.45637	-1.32551	Slc25a4,Slc25a5,Bad,Bak1,Bax,Siva1,Acaa2,Mul1,Plekhf1,Chchd10,Ppif	11/62
GO Biological Processes	GO:0071826	Protein-RNA complex organization	-3.40661	-1.29669	Rplp0,Coil,Eif6,Rpl6,Rps14,Rps5,Snrpc,Abt1,Mrps7,Rps28,Ruvbl1,Rrs1,Mrpl20,Rpl11,Gemin6,Snrpd3,Rps27l,Gemin7,Ddx28,Dyrk3,Rpl23a	21/176
GO Biological Processes	GO:0072329	Monocarboxylic acid catabolic process	-3.37991	-1.2736	Acads,Cpt2,Crat,Eci1,Lpin1,Decr2,Slc27a4,Acaa2,Aig1,Dcxr,Mtln,Pex13,Ehhadh,Acox2,Etfa,Acot2	16/117
GO Biological Processes	GO:0061024	Membrane organization	-3.34772	-1.258	Slc25a4,Slc25a5,Apoe,Bad,Bak1,Bax,Cd9,Clu,Ppt1,Psap,Nectin2,Rab20,Exoc4,Smpd1,Tpst2,Cln8,Tomm70a,Timm13,Timm10,Siva1,Atp8a2,Acaa2,Timm22,Gltp,Emc6,Chchd6,Baiap2l1,Mtfp1,Maip1,Apool,Mul1,Tmed10,Plekhf1,Emc7,Izumo1,Cptp,Rilpl2,Dnaja3,Exoc8,Chchd10,Ppif,Xrcc4,Laptm4b,Snx18,Baiap2l2,Chmp6,Tmem11,Xkr6,Micos13,Plaat3,Spire2,Atp8b5,Fa2h,Tlcd2,Xkr8,Wdr83os,Degs1l	57/686
GO Biological Processes	GO:0022618	Protein-RNA complex assembly	-3.26006	-1.17817	Rplp0,Coil,Eif6,Rpl6,Rps14,Rps5,Snrpc,Abt1,Mrps7,Rps28,Ruvbl1,Rrs1,Mrpl20,Rpl11,Gemin6,Snrpd3,Rps27l,Gemin7,Ddx28,Rpl23a	20/168
GO Biological Processes	GO:1905954	Positive regulation of lipid localization	-3.16982	-1.10782	Plin2,Apoe,Cyp4a10,Cyp4a14,Dbi,Ces1c,Mif,Atp8a2,Plin3,Plin5,Fitm1,Acacb,Xrcc4,Fitm2,Apob,Cyp4a12a,Cyp4a32	17/134
GO Biological Processes	GO:0051204	Protein insertion into mitochondrial membrane	-3.12242	-1.06686	Bax,Tomm70a,Timm13,Timm10,Timm22,Maip1	6/22
GO Biological Processes	GO:0035751	Regulation of lysosomal lumen pH	-3.12242	-1.06686	Atp6v0c,Grn,Ppt1,Tmem9,Cln6,Creg1	6/22
GO Biological Processes	GO:0010822	Positive regulation of mitochondrion organization	-3.08019	-1.03145	Slc25a4,Slc25a5,Bad,Bak1,Bax,Siva1,Prkn,Irgm2,Mul1,Fam162a,Chchd10,Ppif	12/79
GO Biological Processes	GO:0005975	Carbohydrate metabolic process	-3.05635	-1.01338	Gla,Aldoc,Bad,Glb1,Eno1,Ext2,Fbp2,Gpd2,Galk1,Onecut1,Hyal1,Lepr,Mdh2,Mdh1,Pgam1,Pgk1,Rbp4,St3gal2,Tpi1,Siae,Pdk4,Gyg,Stbd1,Fuca2,Pgp,C1qtnf12,Dcxr,Chid1,Fuom,Galk2,Chst14,Glo1,Pygb,Hexdc,Amdhd2,Idh2,Gdpgp1,Galm	38/421
GO Biological Processes	GO:0052547	Regulation of peptidase activity	-3.03271	-1.00086	Ahsg,Anxa8,Serpinc1,Bad,Bak1,Bax,Serpina6,Cldn3,Cldn4,Cradd,Cst3,Cstb,Ctsb,Ctsd,Ctsl,Fadd,Rack1,Gpc3,Gpx1,Grn,Serpind1,Hspd1,Mgmt,Por,Rnf7,Serpinf1,Timp2,Pebp1,Park7,Serpinb1a,Rps27l,Mul1,Lamtor5,Tmed10,Svbp,Fam162a,Wfdc3,Dnaja3,Itih5,Serpina10,Nlrp12	41/466
GO Biological Processes	GO:0140694	Non-membrane-bounded organelle assembly	-3.02182	-0.994091	Rplp0,C1qbp,Bscl2,Eif6,Krt19,Krt8,Rpl6,Rps14,Rps5,Abt1,Mrps7,Rps28,Wrap73,Rrs1,Sac3d1,Mrpl20,Rpl11,Patl2,Poldip2,Rps27l,Fitm1,Ddx28,Ccp110,Mrps2,Ythdf2,Map9,Fitm2,Sh3pxd2b,Rpl23a,Tubgcp6,Snhg15	31/323
GO Biological Processes	GO:0019395	Fatty acid oxidation	-2.93396	-0.926707	Acads,Adh5,Cpt2,Crat,Eci1,Por,Acaa2,Mtln,Pex13,Ehhadh,Acox2,Etfa	12/82
GO Biological Processes	GO:1901526	Positive regulation of mitophagy	-2.90653	-0.918826	Slc25a4,Slc25a5,Prkn,Irgm2	4/10
GO Biological Processes	GO:0045039	Protein insertion into mitochondrial inner membrane	-2.90653	-0.918826	Tomm70a,Timm13,Timm10,Timm22	4/10
GO Biological Processes	GO:0002084	Protein depalmitoylation	-2.90653	-0.918826	Lypla1,Ppt1,Abhd13,Abhd17c	4/10
GO Biological Processes	GO:0098734	Macromolecule depalmitoylation	-2.90653	-0.918826	Lypla1,Ppt1,Abhd13,Abhd17c	4/10
GO Biological Processes	GO:0033344	Cholesterol efflux	-2.85281	-0.889025	Apoa4,Apoe,Soat1,Apoa5,Npc2,Apob,Tsku	7/33
GO Biological Processes	GO:0006605	Protein targeting	-2.84008	-0.884723	Clu,Hspd1,Grpel1,Grpel2,Exoc4,Timm17a,Ywhag,Tomm70a,Timm13,Timm8a1,Timm10,Irgm2,Pex14,Timm22,Dnajc15,Tomm7,Sec61b,Rpl11,Tomm20,Tomm5,Pex13,Chchd4,Pmpcb,Arxes1,Hps4	25/248
GO Biological Processes	GO:0042157	Lipoprotein metabolic process	-2.83577	-0.884723	Apoa4,Apoe,Ctsd,Glul,Lypla1,Ppt1,Irgm2,Apoa5,Pyurf,Pgap4,Abhd13,Abhd17c,Pigh,Npc1l1,Apob	15/119
GO Biological Processes	GO:0090151	Establishment of protein localization to mitochondrial membrane	-2.80578	-0.862195	Bax,Tomm70a,Timm13,Timm10,Timm22,Maip1	6/25
GO Biological Processes	GO:0007035	Vacuolar acidification	-2.80578	-0.862195	Atp6v0c,Grn,Ppt1,Tmem9,Cln6,Creg1	6/25
GO Biological Processes	GO:0055088	Lipid homeostasis	-2.79596	-0.854831	Apoa4,Apoe,Tspo,Ces1c,Soat1,Cln8,Angptl4,Apoa5,Lamtor1,Abhd5,Mtln,Npc2,Tmem97,Gpr39,Acox2,Fitm2,Npc1l1,Apob,Tsku,Tlcd2	20/183
GO Biological Processes	GO:1905952	Regulation of lipid localization	-2.77114	-0.834897	Plin2,Apoa4,Apoe,Tspo,Cyp4a10,Cyp4a14,Dbi,Ces1c,Mif,Atp8a2,Lamtor1,Plin3,Plin5,Abhd5,Fitm1,Acacb,Xrcc4,Fitm2,Apob,Cyp4a12a,Cyp4a32	21/197
GO Biological Processes	GO:0010823	Negative regulation of mitochondrion organization	-2.72703	-0.805106	Slc25a4,Slc25a5,Bak1,Tspo,Gpx1,Prkn,Acaa2,Mul1,Ppif	9/54
GO Biological Processes	GO:0051346	Negative regulation of hydrolase activity	-2.70493	-0.794585	Ahsg,Anxa8,Serpinc1,Serpina6,Cst3,Cstb,Ctsb,Lpin1,Gpc3,Gpx1,Grn,Serpind1,Hras,Lepr,Por,Ppp1r1b,Apcs,Serpinf1,Timp2,Pebp1,Slc27a4,Park7,Angptl4,Serpinb1a,Plin5,Lamtor5,Tmed10,Wfdc3,Dnaja3,Sh3bp4,Egln1,Itih5,Serpina10	33/367
GO Biological Processes	GO:0034389	Lipid droplet organization	-2.69559	-0.79205	Plin2,Cidec,Bscl2,Plin3,Plin5,Fitm1,Fitm2	7/35
GO Biological Processes	GO:0006066	Alcohol metabolic process	-2.63055	-0.738123	Adh5,Apoa4,Apoe,Ephx1,Ces1c,Fdx1,Galk1,Hsd17b7,Lepr,Rbp4,Smpd1,Soat1,Spr,Tpi1,Cln8,Apon,Gde1,Park7,Pgp,Retsat,Npc2,Cln6,Rdh14,Npc1l1,Apob,Tsku,Idh2,Plb1	28/299
GO Biological Processes	GO:0010883	Regulation of lipid storage	-2.61408	-0.730642	Plin2,Ces1c,Plin3,Plin5,Abhd5,Fitm1,Acacb,Fitm2,Apob	9/56
GO Biological Processes	GO:0042632	Cholesterol homeostasis	-2.61224	-0.730642	Apoa4,Apoe,Tspo,Ces1c,Soat1,Apoa5,Lamtor1,Npc2,Tmem97,Gpr39,Npc1l1,Apob,Tsku	13/101
GO Biological Processes	GO:0034660	NcRNA metabolic process	-2.60933	-0.729912	Eif6,Rpl7,Rps14,Rps17,Rps7,Rps8,Tert,Abt1,Nhp2,Bysl,Rps28,Rrs1,Tsen34,Nop10,Lage3,Rpl7l1,Rpl35,Polr2l,Rpl11,Mrm3,Wdr55,Urm1,Mrpl44,Mocs3,Rnf113a1,Rpp25l,Yars2,Pop7,Nudt16,Wdr6,Snapc2,Rpusd1,Pars2,Thumpd1,Pnldc1,Exd1,Dtd2,Trmt61a,Lcmt2,Snapc5,Rps27rt	41/491
GO Biological Processes	GO:1902652	Secondary alcohol metabolic process	-2.6052	-0.729912	Apoa4,Apoe,Ces1c,Fdx1,Hsd17b7,Lepr,Smpd1,Soat1,Cln8,Apon,Npc2,Cln6,Npc1l1,Apob,Tsku,Idh2	16/138
GO Biological Processes	GO:0007033	Vacuole organization	-2.59576	-0.729912	Atp6v0c,Ctsd,Grn,Ppt1,Rab20,Cln8,Stbd1,Irgm2,Emc6,Tmem9,Lamtor1,Map1lc3a,Cln6,Laptm4b,Hps4,Chmp6,Elapor1,Creg1,Rufy4	19/177
GO Biological Processes	GO:0008203	Cholesterol metabolic process	-2.58818	-0.729912	Apoa4,Apoe,Ces1c,Fdx1,Hsd17b7,Lepr,Smpd1,Soat1,Cln8,Apon,Npc2,Cln6,Npc1l1,Apob,Tsku	15/126
GO Biological Processes	GO:0034470	NcRNA processing	-2.58657	-0.729912	Eif6,Rpl7,Rps14,Rps17,Rps7,Rps8,Tert,Abt1,Nhp2,Bysl,Rps28,Rrs1,Tsen34,Nop10,Lage3,Rpl7l1,Rpl35,Rpl11,Mrm3,Wdr55,Urm1,Mrpl44,Mocs3,Rnf113a1,Rpp25l,Pop7,Wdr6,Rpusd1,Thumpd1,Pnldc1,Exd1,Trmt61a,Lcmt2,Rps27rt	34/388
GO Biological Processes	GO:0034440	Lipid oxidation	-2.58143	-0.72679	Acads,Adh5,Cpt2,Crat,Eci1,Por,Acaa2,Mtln,Pex13,Ehhadh,Acox2,Etfa	12/90
GO Biological Processes	GO:0055092	Sterol homeostasis	-2.57395	-0.724238	Apoa4,Apoe,Tspo,Ces1c,Soat1,Apoa5,Lamtor1,Npc2,Tmem97,Gpr39,Npc1l1,Apob,Tsku	13/102
GO Biological Processes	GO:0016125	Sterol metabolic process	-2.57327	-0.724238	Apoa4,Apoe,Ces1c,Fdx1,Hsd17b7,Lepr,Smpd1,Soat1,Cln8,Apon,Npc2,Ebpl,Cln6,Npc1l1,Apob,Tsku	16/139
GO Biological Processes	GO:1901029	Negative regulation of mitochondrial outer membrane permeabilization involved in apoptotic signaling pathway	-2.57091	-0.724238	Slc25a4,Slc25a5,Bak1,Acaa2	4/12
GO Biological Processes	GO:0006635	Fatty acid beta-oxidation	-2.55979	-0.716096	Acads,Cpt2,Crat,Eci1,Acaa2,Mtln,Ehhadh,Acox2,Etfa	9/57
GO Biological Processes	GO:0007040	Lysosome organization	-2.54082	-0.704044	Atp6v0c,Grn,Ppt1,Rab20,Cln8,Tmem9,Lamtor1,Cln6,Laptm4b,Hps4,Chmp6,Creg1	12/91
GO Biological Processes	GO:0080171	Lytic vacuole organization	-2.54082	-0.704044	Atp6v0c,Grn,Ppt1,Rab20,Cln8,Tmem9,Lamtor1,Cln6,Laptm4b,Hps4,Chmp6,Creg1	12/91
GO Biological Processes	GO:0006364	RRNA processing	-2.53521	-0.704044	Eif6,Rpl7,Rps14,Rps17,Rps7,Rps8,Abt1,Nhp2,Bysl,Rps28,Rrs1,Nop10,Rpl7l1,Rpl35,Rpl11,Mrm3,Wdr55,Mrpl44,Pop7,Rpusd1,Rps27rt	21/206
GO Biological Processes	GO:0016054	Organic acid catabolic process	-2.52566	-0.698288	Acads,Cpt2,Crat,Eci1,Lpin1,Got2,Decr2,Slc27a4,Acaa2,Tdo2,Aig1,Qprt,Dcxr,Mtln,Pex13,Ehhadh,Acox2,Etfa,Acot2,Amdhd2,Acsf3,Acmsd	22/220
GO Biological Processes	GO:0046395	Carboxylic acid catabolic process	-2.52566	-0.698288	Acads,Cpt2,Crat,Eci1,Lpin1,Got2,Decr2,Slc27a4,Acaa2,Tdo2,Aig1,Qprt,Dcxr,Mtln,Pex13,Ehhadh,Acox2,Etfa,Acot2,Amdhd2,Acsf3,Acmsd	22/220
GO Biological Processes	GO:0046394	Carboxylic acid biosynthetic process	-2.47204	-0.648431	Cyp4a10,Cyp4a14,Glul,Got2,Gstm1,Gstm4,Gstp2,Gstp1,Mif,Decr2,Park7,Fads3,Ndufab1,Chst14,Elovl7,Acox2,Acacb,Cth,Acsf3,Mthfd1l,Cyp4a12a,Bhmt1b,Fa2h,Cyp4a32	24/250
GO Biological Processes	GO:0051205	Protein insertion into membrane	-2.45533	-0.633589	Bax,Tomm70a,Timm13,Timm10,Timm22,Emc6,Maip1,Emc7,Wdr83os	9/59
GO Biological Processes	GO:0006637	Acyl-CoA metabolic process	-2.43122	-0.621465	Acot1,Acaa2,Suclg1,Tdo2,Mpc2,Ehhadh,Acacb,Ppcs,Acot2,Acot6,Fitm2	11/82
GO Biological Processes	GO:0035383	Thioester metabolic process	-2.43122	-0.621465	Acot1,Acaa2,Suclg1,Tdo2,Mpc2,Ehhadh,Acacb,Ppcs,Acot2,Acot6,Fitm2	11/82
GO Biological Processes	GO:0033865	Nucleoside bisphosphate metabolic process	-2.42674	-0.621465	Acot1,Acaa2,Suclg1,Tdo2,Mpc2,Coasy,Ehhadh,Pank1,Acacb,Ppcs,Acot2,Acot6,Fitm2	13/106
GO Biological Processes	GO:0033875	Ribonucleoside bisphosphate metabolic process	-2.42674	-0.621465	Acot1,Acaa2,Suclg1,Tdo2,Mpc2,Coasy,Ehhadh,Pank1,Acacb,Ppcs,Acot2,Acot6,Fitm2	13/106
GO Biological Processes	GO:0034032	Purine nucleoside bisphosphate metabolic process	-2.42674	-0.621465	Acot1,Acaa2,Suclg1,Tdo2,Mpc2,Coasy,Ehhadh,Pank1,Acacb,Ppcs,Acot2,Acot6,Fitm2	13/106
GO Biological Processes	GO:0044272	Sulfur compound biosynthetic process	-2.42674	-0.621465	Ext2,Gstm1,Gstp2,Gstp1,Mpc2,Chst14,Glce,Acacb,Ppcs,Cth,Mat2a,Mpst,Bhmt1b	13/106
GO Biological Processes	GO:0006885	Regulation of pH	-2.42674	-0.621465	Atp5b,Atp6v0c,Grn,Ppt1,Rab20,Car14,Pdk4,Slc4a4,Tmem9,Gpr39,Cln6,Slc4a9,Creg1	13/106
GO Biological Processes	GO:0030258	Lipid modification	-2.42496	-0.621465	Acads,Adh5,Cpt2,Crat,Cyp2e1,Cyp3a11,Eci1,Por,St3gal2,Acaa2,Mtln,Pex13,Ehhadh,Acox2,Etfa,Inpp5j,Slc35c1,Fa2h	18/170
GO Biological Processes	GO:0008637	Apoptotic mitochondrial changes	-2.41071	-0.612547	Slc25a4,Bad,Bak1,Bax,Hspd1,Jun,Rnf7,Prkn,Acaa2,Ppif	10/71
GO Biological Processes	GO:0016053	Organic acid biosynthetic process	-2.40627	-0.609945	Cyp4a10,Cyp4a14,Glul,Got2,Gstm1,Gstm4,Gstp2,Gstp1,Mif,Decr2,Park7,Fads3,Ndufab1,Chst14,Elovl7,Acox2,Acacb,Cth,Acsf3,Mthfd1l,Cyp4a12a,Bhmt1b,Fa2h,Cyp4a32	24/253
GO Biological Processes	GO:0010821	Regulation of mitochondrion organization	-2.33158	-0.554099	Slc25a4,Slc25a5,Bad,Bak1,Bax,Tspo,Gpx1,Siva1,Prkn,Acaa2,Irgm2,Mul1,Fam162a,Chchd10,Ppif,Stox1	16/147
GO Biological Processes	GO:0072594	Establishment of protein localization to organelle	-2.30197	-0.543979	Bax,Tspo,Cdkn1a,Clu,Hspd1,Lamp1,Grpel1,Grpel2,Nup50,Med1,Tert,Timm17a,Tomm70a,Timm13,Timm8a1,Timm10,Irgm2,Pex14,Timm22,Nxt1,Dnajc15,Tomm7,Sec61b,Tomm20,Maip1,Tomm5,Pex13,Chchd4,Pmpcb,Arxes1	30/345
GO Biological Processes	GO:1903599	Positive regulation of autophagy of mitochondrion	-2.30171	-0.543979	Slc25a4,Slc25a5,Prkn,Irgm2	4/14
GO Biological Processes	GO:0051452	Intracellular pH reduction	-2.1735	-0.467594	Atp6v0c,Grn,Ppt1,Rab20,Tmem9,Cln6,Creg1	7/43
GO Biological Processes	GO:0030641	Regulation of cellular pH	-2.15909	-0.464149	Atp5b,Atp6v0c,Grn,Ppt1,Rab20,Slc4a4,Tmem9,Gpr39,Cln6,Slc4a9,Creg1	11/89
GO Biological Processes	GO:0097250	Mitochondrial respirasome assembly	-2.01727	-0.363465	Cox7a2,Cox7a2l,Higd2a	3/9
GO Biological Processes	GO:0051453	Regulation of intracellular pH	-2.00547	-0.352928	Atp5b,Atp6v0c,Grn,Ppt1,Rab20,Slc4a4,Tmem9,Cln6,Slc4a9,Creg1	10/81
